# Supplementary material for: Detecting potential causal relationship between multiple risk factors and Alzheimer’s disease using multivariable Mendelian randomization
Source: Aging (Albany NY). 2020 Nov 7;12(21):21747–57. doi: 10.18632/aging.103983 (PMC7695397; doi:10.18632/aging.103983)
Supplement: Supplementary Table 1 [file aging-12-103983-s001..xlsx]

## Sheet: AD_dat
SNP	effect_allele.exposure	other_allele.exposure	effect_allele.outcome	other_allele.outcome	beta.exposure	beta.outcome	eaf.exposure	se.outcome	samplesize.outcome	pval.outcome	outcome.deprecated	pval.exposure	se.exposure	samplesize.exposure	exposure
rs1000096	T	C	T	C	-0.0133384	0.0045	0.401094	0.0161	54162	0.7804	Alzheimer's disease || ||	5.10035e-11	0.00203101	461460	Body mass index (BMI) || id:ukb-b-19953
rs10063055	T	C	T	C	0.0136775	-0.011	0.253365	0.0183	54162	0.549	Alzheimer's disease || ||	1.7e-09	0.00226991	461460	Body mass index (BMI) || id:ukb-b-19953
rs10099330	G	A	G	A	0.0124247	-0.0194	0.45285	0.0156	54162	0.2153	Alzheimer's disease || ||	4.20001e-10	0.00198907	461460	Body mass index (BMI) || id:ukb-b-19953
rs10160769	C	G	C	G	-0.0155862	-0.0396	0.21751	0.0184	54162	0.0314702	Alzheimer's disease || ||	1.2e-10	0.00242199	461460	Body mass index (BMI) || id:ukb-b-19953
rs10169594	C	T	C	T	0.0121875	-0.0029	0.363139	0.0166	54162	0.8631	Alzheimer's disease || ||	2.99999e-09	0.00205506	461460	Body mass index (BMI) || id:ukb-b-19953
rs10172070	T	C	T	C	0.0161392	0.0106	0.146466	0.0228	54162	0.6405	Alzheimer's disease || ||	6.69993e-09	0.00278352	461460	Body mass index (BMI) || id:ukb-b-19953
rs10182416	G	A	G	A	0.0130378	-0.0135	0.512223	0.0154	54162	0.3817	Alzheimer's disease || ||	3.69999e-11	0.00197134	461460	Body mass index (BMI) || id:ukb-b-19953
rs10423928	A	T	A	T	-0.0340136	0.0019	0.194358	0.0204	54162	0.9247	Alzheimer's disease || ||	3.40017e-42	0.00249869	461460	Body mass index (BMI) || id:ukb-b-19953
rs10505836	C	A	C	A	0.0184851	0.006	0.860012	0.0216	54162	0.7833	Alzheimer's disease || ||	1.2e-10	0.00287086	461460	Body mass index (BMI) || id:ukb-b-19953
rs10510025	T	C	T	C	0.0175643	-0.0295	0.247013	0.0183	54162	0.1075	Alzheimer's disease || ||	2.19989e-14	0.00229886	461460	Body mass index (BMI) || id:ukb-b-19953
rs1064213	A	G	A	G	0.0149301	-0.0065	0.478377	0.0154	54162	0.670601	Alzheimer's disease || ||	3.69999e-14	0.00197196	461460	Body mass index (BMI) || id:ukb-b-19953
rs10742752	C	T	C	T	0.0117979	-0.0216	0.612239	0.0164	54162	0.1886	Alzheimer's disease || ||	6.1e-09	0.00202961	461460	Body mass index (BMI) || id:ukb-b-19953
rs10756714	G	A	G	A	-0.0207862	-0.0144	0.444196	0.0156	54162	0.3552	Alzheimer's disease || ||	1.9002e-25	0.00199408	461460	Body mass index (BMI) || id:ukb-b-19953
rs10756792	T	C	T	C	-0.0190582	-0.049	0.742901	0.0179	54162	0.00624597	Alzheimer's disease || ||	4.90004e-17	0.00227201	461460	Body mass index (BMI) || id:ukb-b-19953
rs10760277	T	C	T	C	0.0138734	0.0205	0.385049	0.0165	54162	0.2131	Alzheimer's disease || ||	1e-11	0.00203825	461460	Body mass index (BMI) || id:ukb-b-19953
rs10780248	A	G	A	G	-0.0121232	0.0033	0.559454	0.0161	54162	0.8384	Alzheimer's disease || ||	1.2e-09	0.00199415	461460	Body mass index (BMI) || id:ukb-b-19953
rs1078141	T	C	T	C	0.0142239	-0.0265	0.383867	0.0164	54162	0.1056	Alzheimer's disease || ||	4.90004e-12	0.00205862	461460	Body mass index (BMI) || id:ukb-b-19953
rs10799778	G	T	G	T	-0.0182237	0.0146	0.833718	0.0205	54162	0.477	Alzheimer's disease || ||	6.00067e-12	0.00264876	461460	Body mass index (BMI) || id:ukb-b-19953
rs10809621	G	C	G	C	-0.0125305	-0.0083	0.350143	0.0163	54162	0.6089	Alzheimer's disease || ||	1.40001e-09	0.00207043	461460	Body mass index (BMI) || id:ukb-b-19953
rs10824211	T	C	T	C	0.0207688	0.0377	0.139491	0.023	54162	0.1013	Alzheimer's disease || ||	4.30031e-13	0.00286631	461460	Body mass index (BMI) || id:ukb-b-19953
rs10832778	G	C	G	C	0.0115628	-0.028	0.623038	0.0159	54162	0.0784097	Alzheimer's disease || ||	1.40001e-08	0.00203985	461460	Body mass index (BMI) || id:ukb-b-19953
rs10887578	C	G	C	G	0.0133212	-0.0064	0.497499	0.0159	54162	0.685799	Alzheimer's disease || ||	2.09991e-11	0.00198909	461460	Body mass index (BMI) || id:ukb-b-19953
rs10927006	C	T	C	T	-0.0168156	0.0036	0.143704	0.0228	54162	0.8746	Alzheimer's disease || ||	2.30001e-09	0.00281467	461460	Body mass index (BMI) || id:ukb-b-19953
rs10965698	T	C	T	C	-0.0112741	0.0013	0.369897	0.0163	54162	0.9387	Alzheimer's disease || ||	3.89996e-08	0.002052	461460	Body mass index (BMI) || id:ukb-b-19953
rs10989067	A	G	A	G	0.0169514	-0.0137	0.31593	0.0165	54162	0.4047	Alzheimer's disease || ||	1.39991e-15	0.00212349	461460	Body mass index (BMI) || id:ukb-b-19953
rs11001963	T	C	T	C	0.0116794	0.0068	0.581338	0.0162	54162	0.6745	Alzheimer's disease || ||	7.29995e-09	0.00201921	461460	Body mass index (BMI) || id:ukb-b-19953
rs11009685	T	C	T	C	-0.0130834	-0.0176	0.244096	0.0189	54162	0.3514	Alzheimer's disease || ||	1.40001e-08	0.00230766	461460	Body mass index (BMI) || id:ukb-b-19953
rs11012732	G	A	G	A	0.0216425	-0.0218	0.331683	0.0165	54162	0.1863	Alzheimer's disease || ||	7.10068e-25	0.00210126	461460	Body mass index (BMI) || id:ukb-b-19953
rs11079849	T	C	T	C	-0.020093	-0.0324	0.328531	0.017	54162	0.0570795	Alzheimer's disease || ||	1.80011e-21	0.00211163	461460	Body mass index (BMI) || id:ukb-b-19953
rs11099020	T	C	T	C	-0.0142038	-0.0068	0.640609	0.0164	54162	0.680201	Alzheimer's disease || ||	5.60015e-12	0.00206202	461460	Body mass index (BMI) || id:ukb-b-19953
rs11122450	G	T	G	T	-0.0116316	0.0086	0.611739	0.0165	54162	0.6011	Alzheimer's disease || ||	9.09997e-09	0.00202425	461460	Body mass index (BMI) || id:ukb-b-19953
rs11134679	G	A	G	A	0.0182459	0.0027	0.684753	0.0165	54162	0.8689	Alzheimer's disease || ||	1.20005e-17	0.00213286	461460	Body mass index (BMI) || id:ukb-b-19953
rs11150745	G	A	G	A	-0.0211611	0.0054	0.317711	0.0168	54162	0.746799	Alzheimer's disease || ||	2.90001e-23	0.00212961	461460	Body mass index (BMI) || id:ukb-b-19953
rs111598585	T	C	T	C	-0.0142245	-0.0094	0.208671	0.0196	54162	0.631499	Alzheimer's disease || ||	5.39995e-09	0.00243798	461460	Body mass index (BMI) || id:ukb-b-19953
rs11165643	T	C	T	C	0.0193319	0.0109	0.590103	0.0158	54162	0.488599	Alzheimer's disease || ||	4.90004e-22	0.00200337	461460	Body mass index (BMI) || id:ukb-b-19953
rs111689389	C	G	C	G	-0.0136706	0.0149	0.282614	0.0171	54162	0.3839	Alzheimer's disease || ||	4.70002e-10	0.00219522	461460	Body mass index (BMI) || id:ukb-b-19953
rs11218510	A	G	A	G	-0.0144616	-0.0031	0.40047	0.0161	54162	0.8493	Alzheimer's disease || ||	8.4004e-13	0.00202121	461460	Body mass index (BMI) || id:ukb-b-19953
rs11250094	C	G	C	G	-0.0202907	0.0116	0.548052	0.016	54162	0.4681	Alzheimer's disease || ||	2.29985e-24	0.00199209	461460	Body mass index (BMI) || id:ukb-b-19953
rs1126930	C	G	C	G	0.0322695	0.0112	0.035271	0.0538	54162	0.8358	Alzheimer's disease || ||	1.7e-09	0.00535892	461460	Body mass index (BMI) || id:ukb-b-19953
rs113603865	T	C	T	C	0.0186013	0.0284	0.21205	0.0195	54162	0.1457	Alzheimer's disease || ||	1.80011e-14	0.00242689	461460	Body mass index (BMI) || id:ukb-b-19953
rs113624107	A	G	A	G	0.0150461	-0.0162	0.22586	0.0188	54162	0.3886	Alzheimer's disease || ||	2.1e-10	0.00236876	461460	Body mass index (BMI) || id:ukb-b-19953
rs115056380	A	G	A	G	-0.0256435	0.0677	0.048344	0.0485	54162	0.1625	Alzheimer's disease || ||	2.5e-08	0.0046006	461460	Body mass index (BMI) || id:ukb-b-19953
rs11525873	C	T	C	T	-0.0239781	0.0061	0.097701	0.0289	54162	0.8332	Alzheimer's disease || ||	6.59933e-13	0.00333603	461460	Body mass index (BMI) || id:ukb-b-19953
rs11607476	C	A	C	A	0.015712	-0.007	0.486574	0.016	54162	0.6605	Alzheimer's disease || ||	3.10027e-15	0.00199179	461460	Body mass index (BMI) || id:ukb-b-19953
rs11610621	A	T	A	T	0.0164869	0.0116	0.148174	0.0231	54162	0.615	Alzheimer's disease || ||	3.09999e-09	0.00278318	461460	Body mass index (BMI) || id:ukb-b-19953
rs11630647	A	G	A	G	-0.012674	-0.0381	0.251739	0.0187	54162	0.0419604	Alzheimer's disease || ||	2.69998e-08	0.00228082	461460	Body mass index (BMI) || id:ukb-b-19953
rs11634851	G	C	G	C	0.0118671	0.0335	0.465442	0.0157	54162	0.0329397	Alzheimer's disease || ||	2.19999e-09	0.00198456	461460	Body mass index (BMI) || id:ukb-b-19953
rs116374395	A	G	A	G	0.0318817	-0.0583	0.035444	0.0416	54162	0.1615	Alzheimer's disease || ||	2.80001e-09	0.00536236	461460	Body mass index (BMI) || id:ukb-b-19953
rs11641179	G	A	G	A	-0.0125461	-0.0094	0.257141	0.0181	54162	0.6038	Alzheimer's disease || ||	3.40001e-08	0.00227364	461460	Body mass index (BMI) || id:ukb-b-19953
rs11642090	C	T	C	T	0.0114184	-0.0202	0.373536	0.0176	54162	0.2506	Alzheimer's disease || ||	2.90001e-08	0.00205925	461460	Body mass index (BMI) || id:ukb-b-19953
rs11656076	A	G	A	G	-0.0154285	-0.0264	0.224774	0.0182	54162	0.1482	Alzheimer's disease || ||	7.59976e-11	0.00237054	461460	Body mass index (BMI) || id:ukb-b-19953
rs1167311	A	G	A	G	-0.0192649	-0.0357	0.681309	0.0173	54162	0.0393904	Alzheimer's disease || ||	1.59993e-19	0.00213109	461460	Body mass index (BMI) || id:ukb-b-19953
rs11675464	G	A	G	A	0.0119751	0.0148	0.562988	0.0157	54162	0.3439	Alzheimer's disease || ||	1.6e-09	0.00198558	461460	Body mass index (BMI) || id:ukb-b-19953
rs11691869	A	C	A	C	-0.0193158	-0.0205	0.362038	0.0171	54162	0.2297	Alzheimer's disease || ||	5.60015e-21	0.00205562	461460	Body mass index (BMI) || id:ukb-b-19953
rs11709402	G	A	G	A	0.0228192	-0.0185	0.278732	0.0175	54162	0.2887	Alzheimer's disease || ||	4.90004e-25	0.00220796	461460	Body mass index (BMI) || id:ukb-b-19953
rs117342986	T	C	T	C	0.0365794	-0.0551	0.026415	0.0519	54162	0.2889	Alzheimer's disease || ||	1.6e-08	0.00646781	461460	Body mass index (BMI) || id:ukb-b-19953
rs11757278	C	T	C	T	-0.0146269	-0.0143	0.303879	0.0168	54162	0.3941	Alzheimer's disease || ||	9.8992e-12	0.00214834	461460	Body mass index (BMI) || id:ukb-b-19953
rs11778219	G	A	G	A	0.015796	0.0065	0.163123	0.0212	54162	0.760801	Alzheimer's disease || ||	4.20001e-09	0.0026874	461460	Body mass index (BMI) || id:ukb-b-19953
rs118136827	T	G	T	G	-0.0132582	0.0104	0.281086	0.0185	54162	0.5743	Alzheimer's disease || ||	1.7e-09	0.0022019	461460	Body mass index (BMI) || id:ukb-b-19953
rs11842871	T	G	T	G	-0.0150426	0.0409	0.259959	0.0185	54162	0.0269501	Alzheimer's disease || ||	2.80027e-11	0.0022601	461460	Body mass index (BMI) || id:ukb-b-19953
rs12001437	C	T	C	T	0.0121836	-0.0047	0.367678	0.0159	54162	0.766699	Alzheimer's disease || ||	2.80001e-09	0.00205069	461460	Body mass index (BMI) || id:ukb-b-19953
rs12072739	G	A	G	A	0.0157008	-0.021	0.224478	0.0187	54162	0.2623	Alzheimer's disease || ||	3.29989e-11	0.00236691	461460	Body mass index (BMI) || id:ukb-b-19953
rs12088284	T	C	T	C	0.0139317	0.0183	0.300838	0.0182	54162	0.3139	Alzheimer's disease || ||	8.9002e-11	0.00214854	461460	Body mass index (BMI) || id:ukb-b-19953
rs12089815	A	G	A	G	-0.0123121	-0.03	0.54861	0.0161	54162	0.0624496	Alzheimer's disease || ||	5.69994e-10	0.00198606	461460	Body mass index (BMI) || id:ukb-b-19953
rs12140153	T	G	T	G	-0.033075	0.0666	0.094252	0.0329	54162	0.0426305	Alzheimer's disease || ||	1.20005e-21	0.0034589	461460	Body mass index (BMI) || id:ukb-b-19953
rs12149660	A	G	A	G	-0.0227338	-0.0654	0.114956	0.0248	54162	0.00835199	Alzheimer's disease || ||	2.99985e-13	0.00311586	461460	Body mass index (BMI) || id:ukb-b-19953
rs12259464	A	G	A	G	0.0130895	-0.0142	0.48447	0.0154	54162	0.3577	Alzheimer's disease || ||	4.49987e-11	0.00198686	461460	Body mass index (BMI) || id:ukb-b-19953
rs12273545	T	C	T	C	0.0248393	0.0072	0.056505	0.0339	54162	0.8325	Alzheimer's disease || ||	6.80002e-09	0.00428551	461460	Body mass index (BMI) || id:ukb-b-19953
rs1229984	C	T	C	T	0.037357	-0.0444	0.972775	0.0424	54162	0.295	Alzheimer's disease || ||	4.60002e-10	0.00599385	461460	Body mass index (BMI) || id:ukb-b-19953
rs12364470	G	T	G	T	0.0192705	0.0221	0.164556	0.0237	54162	0.351	Alzheimer's disease || ||	4.90004e-13	0.0026658	461460	Body mass index (BMI) || id:ukb-b-19953
rs12440603	T	C	T	C	0.0139285	-0.0001	0.433693	0.0155	54162	0.9939	Alzheimer's disease || ||	3.40017e-12	0.0020011	461460	Body mass index (BMI) || id:ukb-b-19953
rs12459368	G	A	G	A	-0.0170141	-0.0086	0.268203	0.0183	54162	0.6398	Alzheimer's disease || ||	2.49977e-14	0.00223235	461460	Body mass index (BMI) || id:ukb-b-19953
rs12462975	A	G	A	G	0.0195822	-0.009	0.329692	0.0178	54162	0.6125	Alzheimer's disease || ||	2.60016e-20	0.00212071	461460	Body mass index (BMI) || id:ukb-b-19953
rs12507026	T	A	T	A	0.0289896	0.0012	0.43475	0.016	54162	0.9418	Alzheimer's disease || ||	6.29941e-48	0.0019931	461460	Body mass index (BMI) || id:ukb-b-19953
rs12541408	C	T	C	T	-0.0143261	0.0192	0.31742	0.017	54162	0.2584	Alzheimer's disease || ||	1.59993e-11	0.00212723	461460	Body mass index (BMI) || id:ukb-b-19953
rs1266874	G	A	G	A	0.0140966	-0.0055	0.349619	0.016	54162	0.732099	Alzheimer's disease || ||	1e-11	0.0020712	461460	Body mass index (BMI) || id:ukb-b-19953
rs12681792	A	C	A	C	0.0148693	0.0099	0.1926	0.0219	54162	0.6503	Alzheimer's disease || ||	3.50002e-09	0.00251693	461460	Body mass index (BMI) || id:ukb-b-19953
rs12692596	T	C	T	C	0.0130872	0.0315	0.37185	0.0166	54162	0.0569994	Alzheimer's disease || ||	1.29999e-10	0.00203738	461460	Body mass index (BMI) || id:ukb-b-19953
rs12696039	G	A	G	A	-0.0152802	0.0046	0.149405	0.0221	54162	0.8338	Alzheimer's disease || ||	3.50002e-08	0.0027705	461460	Body mass index (BMI) || id:ukb-b-19953
rs1286058	A	T	A	T	0.0149126	-0.0147	0.703747	0.0169	54162	0.3825	Alzheimer's disease || ||	6.20012e-12	0.00216922	461460	Body mass index (BMI) || id:ukb-b-19953
rs12881629	G	A	G	A	0.0220748	0.0376	0.08265	0.0406	54162	0.3556	Alzheimer's disease || ||	7.69999e-10	0.00358929	461460	Body mass index (BMI) || id:ukb-b-19953
rs12889639	A	G	A	G	0.0155336	0.0457	0.651265	0.0161	54162	0.004489	Alzheimer's disease || ||	7.70016e-14	0.00207775	461460	Body mass index (BMI) || id:ukb-b-19953
rs12921986	G	A	G	A	0.0203327	-0.0003	0.077984	0.0292	54162	0.9918	Alzheimer's disease || ||	3.79997e-08	0.0036983	461460	Body mass index (BMI) || id:ukb-b-19953
rs12937411	T	C	T	C	-0.017187	-0.0019	0.408167	0.0163	54162	0.9064	Alzheimer's disease || ||	1.39991e-17	0.00201383	461460	Body mass index (BMI) || id:ukb-b-19953
rs1296328	C	A	C	A	-0.018862	0.0269	0.559032	0.0166	54162	0.1063	Alzheimer's disease || ||	3.90032e-21	0.001999	461460	Body mass index (BMI) || id:ukb-b-19953
rs12974458	T	C	T	C	0.0152466	-0.0177	0.543175	0.0171	54162	0.3021	Alzheimer's disease || ||	2.29985e-14	0.00199717	461460	Body mass index (BMI) || id:ukb-b-19953
rs13012070	A	G	A	G	-0.0136501	-0.0022	0.228388	0.0184	54162	0.9054	Alzheimer's disease || ||	6.1e-09	0.00234795	461460	Body mass index (BMI) || id:ukb-b-19953
rs13033310	A	G	A	G	0.012611	0.0041	0.25276	0.0177	54162	0.8149	Alzheimer's disease || ||	3.29997e-08	0.0022826	461460	Body mass index (BMI) || id:ukb-b-19953
rs13097918	A	T	A	T	0.0145561	-0.0281	0.212315	0.019	54162	0.1387	Alzheimer's disease || ||	1.7e-09	0.0024161	461460	Body mass index (BMI) || id:ukb-b-19953
rs13107325	T	C	T	C	0.0475799	0.0509	0.07492	0.0308	54162	0.0982607	Alzheimer's disease || ||	8.49963e-37	0.00375479	461460	Body mass index (BMI) || id:ukb-b-19953
rs13176429	C	T	C	T	0.0141555	-0.0118	0.687609	0.0166	54162	0.4756	Alzheimer's disease || ||	3.10027e-11	0.00213122	461460	Body mass index (BMI) || id:ukb-b-19953
rs1320251	T	C	T	C	-0.0180321	-0.0011	0.454791	0.0158	54162	0.9458	Alzheimer's disease || ||	1.50003e-19	0.00199407	461460	Body mass index (BMI) || id:ukb-b-19953
rs13218383	G	C	G	C	-0.0144025	0.0152	0.335132	0.0166	54162	0.3584	Alzheimer's disease || ||	5.79963e-12	0.00209236	461460	Body mass index (BMI) || id:ukb-b-19953
rs1322842	G	A	G	A	-0.0131292	0.0244	0.609274	0.0169	54162	0.1491	Alzheimer's disease || ||	1.09999e-10	0.00203539	461460	Body mass index (BMI) || id:ukb-b-19953
rs13248187	C	T	C	T	0.015764	-0.0037	0.268557	0.0177	54162	0.8359	Alzheimer's disease || ||	1.99986e-12	0.00224155	461460	Body mass index (BMI) || id:ukb-b-19953
rs1327259	G	A	G	A	-0.0148532	-0.0037	0.387722	0.0159	54162	0.8147	Alzheimer's disease || ||	2.80027e-13	0.00203363	461460	Body mass index (BMI) || id:ukb-b-19953
rs13291723	A	G	A	G	0.0110318	0.0113	0.570683	0.0157	54162	0.4704	Alzheimer's disease || ||	3.40001e-08	0.00199876	461460	Body mass index (BMI) || id:ukb-b-19953
rs1330199	T	G	T	G	-0.0117509	-0.0202	0.483137	0.0157	54162	0.1993	Alzheimer's disease || ||	3.29997e-09	0.00198642	461460	Body mass index (BMI) || id:ukb-b-19953
rs13420048	A	C	A	C	-0.0154817	0.0006	0.365037	0.0164	54162	0.9717	Alzheimer's disease || ||	4.60045e-14	0.00205272	461460	Body mass index (BMI) || id:ukb-b-19953
rs13427822	G	A	G	A	-0.0181515	0.0389	0.271198	0.0182	54162	0.0323899	Alzheimer's disease || ||	5.60015e-16	0.00224142	461460	Body mass index (BMI) || id:ukb-b-19953
rs1346841	A	G	A	G	-0.013056	0.0177	0.405041	0.0157	54162	0.2599	Alzheimer's disease || ||	9.70063e-11	0.0020172	461460	Body mass index (BMI) || id:ukb-b-19953
rs1360201	T	C	T	C	0.0130075	0.0402	0.481546	0.0154	54162	0.00930101	Alzheimer's disease || ||	4.79954e-11	0.00197747	461460	Body mass index (BMI) || id:ukb-b-19953
rs13642	T	A	T	A	-0.0161363	-0.0026	0.360654	0.0162	54162	0.8744	Alzheimer's disease || ||	4.30031e-15	0.00205695	461460	Body mass index (BMI) || id:ukb-b-19953
rs140159717	T	C	T	C	-0.0246882	0.0217	0.082292	0.0625	54162	0.728299	Alzheimer's disease || ||	2.80027e-11	0.00370967	461460	Body mass index (BMI) || id:ukb-b-19953
rs1438945	A	T	A	T	-0.0133824	0.0067	0.715119	0.0173	54162	0.6984	Alzheimer's disease || ||	1.09999e-09	0.00219791	461460	Body mass index (BMI) || id:ukb-b-19953
rs1441264	A	G	A	G	0.0179033	0.004	0.593681	0.0158	54162	0.7985	Alzheimer's disease || ||	3.40017e-18	0.00205854	461460	Body mass index (BMI) || id:ukb-b-19953
rs1451963	T	G	T	G	0.022201	0.0642	0.082266	0.0288	54162	0.0260501	Alzheimer's disease || ||	7.39997e-10	0.00360585	461460	Body mass index (BMI) || id:ukb-b-19953
rs1454687	G	C	G	C	-0.0207916	0.006	0.515371	0.0153	54162	0.696599	Alzheimer's disease || ||	6.09958e-26	0.00197396	461460	Body mass index (BMI) || id:ukb-b-19953
rs1458156	T	C	T	C	0.014075	0.0022	0.488431	0.0165	54162	0.8962	Alzheimer's disease || ||	1.20005e-12	0.00197951	461460	Body mass index (BMI) || id:ukb-b-19953
rs146569428	A	G	A	G	0.0139533	0.0145	0.200749	0.0224	54162	0.517299	Alzheimer's disease || ||	2e-08	0.00248571	461460	Body mass index (BMI) || id:ukb-b-19953
rs1471093	A	G	A	G	0.0134619	0.0195	0.616663	0.0163	54162	0.2304	Alzheimer's disease || ||	4.10015e-11	0.00203996	461460	Body mass index (BMI) || id:ukb-b-19953
rs1471740	C	T	C	T	0.0193576	-0.0149	0.7405	0.0177	54162	0.3991	Alzheimer's disease || ||	8.9002e-18	0.00225404	461460	Body mass index (BMI) || id:ukb-b-19953
rs147568678	C	T	C	T	-0.0133327	0.0061	0.23807	0.0202	54162	0.7614	Alzheimer's disease || ||	1.09999e-08	0.00233034	461460	Body mass index (BMI) || id:ukb-b-19953
rs1477290	C	T	C	T	0.0337772	0.0025	0.136947	0.0222	54162	0.9111	Alzheimer's disease || ||	2.19989e-31	0.00289815	461460	Body mass index (BMI) || id:ukb-b-19953
rs147730268	T	G	T	G	-0.0350799	-0.0156	0.087243	0.032	54162	0.624701	Alzheimer's disease || ||	1.29987e-22	0.00358357	461460	Body mass index (BMI) || id:ukb-b-19953
rs1503526	C	T	C	T	0.0154308	-0.0205	0.480077	0.0161	54162	0.204	Alzheimer's disease || ||	5.90065e-15	0.00197681	461460	Body mass index (BMI) || id:ukb-b-19953
rs156201	C	G	C	G	0.0131899	-0.0041	0.753455	0.0182	54162	0.8204	Alzheimer's disease || ||	8.30004e-09	0.00228932	461460	Body mass index (BMI) || id:ukb-b-19953
rs156914	A	G	A	G	0.0111552	0.0107	0.491786	0.0222	54162	0.6295	Alzheimer's disease || ||	1.6e-08	0.00197308	461460	Body mass index (BMI) || id:ukb-b-19953
rs1582931	A	G	A	G	-0.0133419	0.0107	0.473242	0.0156	54162	0.4934	Alzheimer's disease || ||	2.29985e-11	0.0019956	461460	Body mass index (BMI) || id:ukb-b-19953
rs159037	C	T	C	T	0.0123714	-0.0101	0.253903	0.0199	54162	0.611699	Alzheimer's disease || ||	4.90004e-08	0.00226776	461460	Body mass index (BMI) || id:ukb-b-19953
rs1608113	T	A	T	A	-0.0117766	0.0379	0.364998	0.0449	54162	0.3986	Alzheimer's disease || ||	9.29994e-09	0.00205086	461460	Body mass index (BMI) || id:ukb-b-19953
rs1609010	G	A	G	A	0.0209773	-0.0202	0.565728	0.0156	54162	0.1954	Alzheimer's disease || ||	7.89951e-26	0.0019963	461460	Body mass index (BMI) || id:ukb-b-19953
rs1657930	A	G	A	G	-0.0146839	0.0047	0.802936	0.019	54162	0.8047	Alzheimer's disease || ||	3.50002e-09	0.00248602	461460	Body mass index (BMI) || id:ukb-b-19953
rs16916303	G	A	G	A	-0.0192369	-0.0062	0.119736	0.025	54162	0.8027	Alzheimer's disease || ||	4.20001e-10	0.00307931	461460	Body mass index (BMI) || id:ukb-b-19953
rs17056301	C	T	C	T	0.0135831	0.0159	0.256425	0.0174	54162	0.3612	Alzheimer's disease || ||	2.19999e-09	0.0022697	461460	Body mass index (BMI) || id:ukb-b-19953
rs17132130	C	G	C	G	-0.0178418	0.0243	0.221467	0.0196	54162	0.2163	Alzheimer's disease || ||	7.50067e-14	0.00238564	461460	Body mass index (BMI) || id:ukb-b-19953
rs17218879	G	C	G	C	0.0126549	0.0108	0.33868	0.0161	54162	0.504001	Alzheimer's disease || ||	1.6e-09	0.00209842	461460	Body mass index (BMI) || id:ukb-b-19953
rs17289010	G	A	G	A	-0.0134661	0.01	0.32787	0.017	54162	0.5554	Alzheimer's disease || ||	1.6e-10	0.00210438	461460	Body mass index (BMI) || id:ukb-b-19953
rs17399739	G	A	G	A	0.0270713	0.0137	0.068893	0.0322	54162	0.67	Alzheimer's disease || ||	4.40048e-12	0.00391006	461460	Body mass index (BMI) || id:ukb-b-19953
rs17446299	G	C	G	C	0.0153235	-0.0098	0.165544	0.0214	54162	0.647	Alzheimer's disease || ||	8.9e-09	0.00266515	461460	Body mass index (BMI) || id:ukb-b-19953
rs17544384	C	T	C	T	0.0140931	-0.0145	0.210864	0.0197	54162	0.4598	Alzheimer's disease || ||	5.30005e-09	0.00241434	461460	Body mass index (BMI) || id:ukb-b-19953
rs17668356	G	C	G	C	-0.0230543	0.0195	0.146029	0.0225	54162	0.3844	Alzheimer's disease || ||	1.50003e-16	0.00279318	461460	Body mass index (BMI) || id:ukb-b-19953
rs17770336	T	C	T	C	0.0242931	0.0381	0.322437	0.0165	54162	0.0209002	Alzheimer's disease || ||	1.29987e-30	0.00211161	461460	Body mass index (BMI) || id:ukb-b-19953
rs1778830	A	G	A	G	0.0140775	-0.0196	0.362165	0.0161	54162	0.2233	Alzheimer's disease || ||	7.50067e-12	0.00205596	461460	Body mass index (BMI) || id:ukb-b-19953
rs1788808	G	A	G	A	-0.020404	0.0085	0.49478	0.0155	54162	0.583899	Alzheimer's disease || ||	7.70016e-25	0.00198255	461460	Body mass index (BMI) || id:ukb-b-19953
rs1793636	C	G	C	G	-0.0133343	0.0074	0.309144	0.0179	54162	0.680299	Alzheimer's disease || ||	4.70002e-10	0.0021408	461460	Body mass index (BMI) || id:ukb-b-19953
rs1805123	G	T	G	T	-0.0167569	-0.0099	0.245301	0.0188	54162	0.5975	Alzheimer's disease || ||	2.99985e-13	0.00229711	461460	Body mass index (BMI) || id:ukb-b-19953
rs1834144	A	C	A	C	-0.0140112	0.0079	0.373192	0.016	54162	0.621199	Alzheimer's disease || ||	8.60003e-12	0.00205213	461460	Body mass index (BMI) || id:ukb-b-19953
rs1861410	T	C	T	C	-0.0212558	-0.0227	0.555423	0.016	54162	0.1568	Alzheimer's disease || ||	1.20005e-26	0.00198918	461460	Body mass index (BMI) || id:ukb-b-19953
rs1884897	G	A	G	A	0.020001	-0.0383	0.627378	0.0159	54162	0.01595	Alzheimer's disease || ||	2.29985e-22	0.00205634	461460	Body mass index (BMI) || id:ukb-b-19953
rs1919243	C	T	C	T	0.0116759	0.0033	0.487406	0.016	54162	0.839	Alzheimer's disease || ||	5.49997e-09	0.00200175	461460	Body mass index (BMI) || id:ukb-b-19953
rs1967772	A	G	A	G	-0.0170434	-0.008	0.285117	0.0177	54162	0.650401	Alzheimer's disease || ||	1e-14	0.00220377	461460	Body mass index (BMI) || id:ukb-b-19953
rs2035936	T	G	T	G	0.0370863	0.0252	0.055892	0.0349	54162	0.4701	Alzheimer's disease || ||	1.69981e-17	0.00435778	461460	Body mass index (BMI) || id:ukb-b-19953
rs2051559	C	T	C	T	0.0204078	0.0475	0.13254	0.0241	54162	0.0481404	Alzheimer's disease || ||	2.80027e-12	0.00291963	461460	Body mass index (BMI) || id:ukb-b-19953
rs2075466	C	G	C	G	0.0132903	-0.0239	0.267182	0.0178	54162	0.1792	Alzheimer's disease || ||	2.80001e-09	0.00223627	461460	Body mass index (BMI) || id:ukb-b-19953
rs2102278	G	A	G	A	0.0118583	-0.018	0.322486	0.018	54162	0.3172	Alzheimer's disease || ||	2e-08	0.0021139	461460	Body mass index (BMI) || id:ukb-b-19953
rs2133561	T	A	T	A	-0.014097	0.0159	0.611084	0.0177	54162	0.3677	Alzheimer's disease || ||	5.79963e-12	0.00204744	461460	Body mass index (BMI) || id:ukb-b-19953
rs213518	C	T	C	T	0.0157894	-0.0226	0.145608	0.0227	54162	0.3189	Alzheimer's disease || ||	1.79999e-08	0.00280491	461460	Body mass index (BMI) || id:ukb-b-19953
rs2153740	G	A	G	A	-0.0112551	-0.0201	0.479914	0.0161	54162	0.2102	Alzheimer's disease || ||	1.6e-08	0.00199313	461460	Body mass index (BMI) || id:ukb-b-19953
rs215634	G	A	G	A	-0.0155223	-0.0223	0.611879	0.0157	54162	0.1562	Alzheimer's disease || ||	2.39994e-14	0.00203492	461460	Body mass index (BMI) || id:ukb-b-19953
rs2172131	C	T	C	T	-0.0149382	0.0026	0.578723	0.0159	54162	0.8677	Alzheimer's disease || ||	8.99912e-14	0.00200386	461460	Body mass index (BMI) || id:ukb-b-19953
rs217672	C	A	C	A	0.0170155	-0.0138	0.271741	0.0196	54162	0.4799	Alzheimer's disease || ||	2.39994e-14	0.00223046	461460	Body mass index (BMI) || id:ukb-b-19953
rs2192158	G	A	G	A	-0.015012	0.0197	0.553308	0.016	54162	0.2173	Alzheimer's disease || ||	3.69999e-14	0.00198302	461460	Body mass index (BMI) || id:ukb-b-19953
rs2216931	A	C	A	C	0.0169109	-0.0047	0.661966	0.0166	54162	0.7778	Alzheimer's disease || ||	5.19996e-16	0.00208587	461460	Body mass index (BMI) || id:ukb-b-19953
rs2234458	T	C	T	C	-0.0203841	0.0315	0.639519	0.0164	54162	0.0542001	Alzheimer's disease || ||	3.59998e-23	0.00205579	461460	Body mass index (BMI) || id:ukb-b-19953
rs2248551	A	G	A	G	0.0146523	0.0439	0.164522	0.0217	54162	0.0432703	Alzheimer's disease || ||	3.79997e-08	0.00266497	461460	Body mass index (BMI) || id:ukb-b-19953
rs2253310	G	C	G	C	0.0173213	0.0449	0.626099	0.016	54162	0.00500495	Alzheimer's disease || ||	2.09991e-17	0.00204115	461460	Body mass index (BMI) || id:ukb-b-19953
rs2271189	A	G	A	G	-0.0163086	0.0104	0.40272	0.0164	54162	0.5269	Alzheimer's disease || ||	6.4998e-16	0.00201869	461460	Body mass index (BMI) || id:ukb-b-19953
rs2289379	T	C	T	C	-0.0152765	0.0015	0.395648	0.0168	54162	0.9277	Alzheimer's disease || ||	5.19996e-14	0.00202952	461460	Body mass index (BMI) || id:ukb-b-19953
rs2307111	C	T	C	T	-0.0280042	0.0186	0.395025	0.0161	54162	0.2474	Alzheimer's disease || ||	1.29987e-43	0.00202203	461460	Body mass index (BMI) || id:ukb-b-19953
rs2342892	G	T	G	T	-0.0126972	0.0172	0.516212	0.0159	54162	0.278	Alzheimer's disease || ||	1.29999e-10	0.00197715	461460	Body mass index (BMI) || id:ukb-b-19953
rs2381404	C	T	C	T	0.0139664	-0.0455	0.243837	0.0187	54162	0.01487	Alzheimer's disease || ||	1.29999e-09	0.00229974	461460	Body mass index (BMI) || id:ukb-b-19953
rs2383377	A	G	A	G	0.0161287	-0.0101	0.130687	0.0239	54162	0.673101	Alzheimer's disease || ||	3.89996e-08	0.00293564	461460	Body mass index (BMI) || id:ukb-b-19953
rs2396625	A	T	A	T	-0.018919	0.0191	0.421331	0.0158	54162	0.2257	Alzheimer's disease || ||	5.60015e-21	0.00201335	461460	Body mass index (BMI) || id:ukb-b-19953
rs2398861	G	A	G	A	0.0179932	0.0262	0.259169	0.0178	54162	0.1406	Alzheimer's disease || ||	2.09991e-15	0.00226733	461460	Body mass index (BMI) || id:ukb-b-19953
rs2425816	A	G	A	G	0.0122284	-0.0163	0.415111	0.0157	54162	0.3001	Alzheimer's disease || ||	1.2e-09	0.00201106	461460	Body mass index (BMI) || id:ukb-b-19953
rs2433733	A	G	A	G	-0.0171805	0.0302	0.677659	0.0162	54162	0.0631801	Alzheimer's disease || ||	3.80014e-16	0.00210907	461460	Body mass index (BMI) || id:ukb-b-19953
rs2439823	G	A	G	A	0.0191998	0.004	0.545612	0.0166	54162	0.8117	Alzheimer's disease || ||	5.30029e-22	0.00199108	461460	Body mass index (BMI) || id:ukb-b-19953
rs2482356	C	T	C	T	-0.0113511	0.0009	0.429018	0.0157	54162	0.9519	Alzheimer's disease || ||	1.29999e-08	0.00199506	461460	Body mass index (BMI) || id:ukb-b-19953
rs2512892	C	T	C	T	0.0129468	0.0244	0.566085	0.0166	54162	0.1433	Alzheimer's disease || ||	9.20026e-11	0.00199819	461460	Body mass index (BMI) || id:ukb-b-19953
rs252761	T	G	T	G	-0.0115046	0.0177	0.587966	0.0161	54162	0.2709	Alzheimer's disease || ||	1.2e-08	0.00201769	461460	Body mass index (BMI) || id:ukb-b-19953
rs2568958	A	G	A	G	0.0222928	-0.0156	0.603656	0.0161	54162	0.3303	Alzheimer's disease || ||	1.59993e-28	0.00201204	461460	Body mass index (BMI) || id:ukb-b-19953
rs2569993	C	T	C	T	0.01267	0.0256	0.320327	0.0172	54162	0.1371	Alzheimer's disease || ||	2.39999e-09	0.00212202	461460	Body mass index (BMI) || id:ukb-b-19953
rs2606228	C	A	C	A	-0.0138791	-0.0236	0.646368	0.0169	54162	0.1629	Alzheimer's disease || ||	2.70023e-11	0.00208379	461460	Body mass index (BMI) || id:ukb-b-19953
rs2616143	A	G	A	G	-0.0138738	-0.0142	0.319862	0.0171	54162	0.4068	Alzheimer's disease || ||	6.70039e-11	0.00212547	461460	Body mass index (BMI) || id:ukb-b-19953
rs2618039	T	A	T	A	0.0143963	-0.0081	0.381481	0.016	54162	0.6141	Alzheimer's disease || ||	1.39991e-12	0.0020317	461460	Body mass index (BMI) || id:ukb-b-19953
rs2678204	G	T	G	T	0.024161	0.0088	0.340162	0.0165	54162	0.5956	Alzheimer's disease || ||	3.80014e-31	0.00208158	461460	Body mass index (BMI) || id:ukb-b-19953
rs2725371	G	A	G	A	-0.0160301	-0.0306	0.696115	0.0175	54162	0.0795701	Alzheimer's disease || ||	1.10002e-13	0.00215845	461460	Body mass index (BMI) || id:ukb-b-19953
rs2791643	T	C	T	C	-0.0133837	-0.0087	0.761794	0.018	54162	0.627401	Alzheimer's disease || ||	7.19996e-09	0.00231332	461460	Body mass index (BMI) || id:ukb-b-19953
rs2814942	A	G	A	G	0.0284856	-0.0064	0.329525	0.0162	54162	0.692299	Alzheimer's disease || ||	5.30029e-42	0.00209768	461460	Body mass index (BMI) || id:ukb-b-19953
rs28350	G	A	G	A	-0.0180335	-0.0092	0.820684	0.0206	54162	0.6569	Alzheimer's disease || ||	2.90001e-12	0.00258234	461460	Body mass index (BMI) || id:ukb-b-19953
rs2837996	C	T	C	T	0.0126647	-0.0177	0.651408	0.0161	54162	0.2707	Alzheimer's disease || ||	1.09999e-09	0.00207859	461460	Body mass index (BMI) || id:ukb-b-19953
rs28404639	T	C	T	C	-0.0117129	-0.0258	0.366041	0.0162	54162	0.1108	Alzheimer's disease || ||	1.2e-08	0.00205533	461460	Body mass index (BMI) || id:ukb-b-19953
rs28489620	A	G	A	G	-0.0153737	-0.0375	0.290349	0.0178	54162	0.0356599	Alzheimer's disease || ||	2.80027e-12	0.00220025	461460	Body mass index (BMI) || id:ukb-b-19953
rs28568418	A	G	A	G	-0.0182825	-0.0319	0.107636	0.0249	54162	0.2	Alzheimer's disease || ||	1.2e-08	0.00320812	461460	Body mass index (BMI) || id:ukb-b-19953
rs2861685	C	T	C	T	-0.0171274	-0.0004	0.411984	0.0156	54162	0.9812	Alzheimer's disease || ||	1e-17	0.00199763	461460	Body mass index (BMI) || id:ukb-b-19953
rs28670671	C	T	C	T	-0.0124638	-0.0034	0.286024	0.03	54162	0.9091	Alzheimer's disease || ||	3.69999e-08	0.00226426	461460	Body mass index (BMI) || id:ukb-b-19953
rs2870111	T	C	T	C	-0.0157151	-0.0328	0.412066	0.0158	54162	0.0381601	Alzheimer's disease || ||	7.10068e-15	0.00201912	461460	Body mass index (BMI) || id:ukb-b-19953
rs2875762	C	G	C	G	0.015339	0.0385	0.242953	0.0182	54162	0.0338797	Alzheimer's disease || ||	3.29989e-11	0.0023121	461460	Body mass index (BMI) || id:ukb-b-19953
rs2899644	T	C	T	C	0.0149659	-0.0102	0.229995	0.0193	54162	0.5972	Alzheimer's disease || ||	2.30001e-10	0.0023609	461460	Body mass index (BMI) || id:ukb-b-19953
rs2920503	T	C	T	C	-0.0140307	-0.0154	0.285413	0.0179	54162	0.3891	Alzheimer's disease || ||	1.7e-10	0.00219666	461460	Body mass index (BMI) || id:ukb-b-19953
rs2922757	T	A	T	A	0.0122465	-0.003	0.597368	0.0159	54162	0.8494	Alzheimer's disease || ||	1.29999e-09	0.00201926	461460	Body mass index (BMI) || id:ukb-b-19953
rs2962334	T	G	T	G	0.0432552	0.0206	0.020065	0.0594	54162	0.7289	Alzheimer's disease || ||	7.79992e-10	0.00703547	461460	Body mass index (BMI) || id:ukb-b-19953
rs317656	A	T	A	T	-0.0144763	-0.0252	0.724452	0.017	54162	0.139	Alzheimer's disease || ||	6.09958e-11	0.00221303	461460	Body mass index (BMI) || id:ukb-b-19953
rs3213943	A	C	A	C	-0.0179406	-0.0046	0.131525	0.0199	54162	0.8162	Alzheimer's disease || ||	4.79999e-10	0.00288163	461460	Body mass index (BMI) || id:ukb-b-19953
rs32421	T	A	T	A	0.0132315	0.0135	0.224315	0.0192	54162	0.4803	Alzheimer's disease || ||	2.59998e-08	0.00237757	461460	Body mass index (BMI) || id:ukb-b-19953
rs329118	T	C	T	C	-0.0165734	-0.0304	0.419409	0.0156	54162	0.0513499	Alzheimer's disease || ||	1.29987e-16	0.0020038	461460	Body mass index (BMI) || id:ukb-b-19953
rs34045288	T	C	T	C	0.0234784	0.0046	0.334435	0.0163	54162	0.778999	Alzheimer's disease || ||	3.50026e-29	0.00209371	461460	Body mass index (BMI) || id:ukb-b-19953
rs34153025	C	T	C	T	-0.0389151	-0.0473	0.022158	0.0854	54162	0.5799	Alzheimer's disease || ||	9.59997e-09	0.00678155	461460	Body mass index (BMI) || id:ukb-b-19953
rs34234296	A	G	A	G	-0.014947	-0.0051	0.392437	0.0176	54162	0.7743	Alzheimer's disease || ||	2.39994e-13	0.00204032	461460	Body mass index (BMI) || id:ukb-b-19953
rs34481751	A	C	A	C	-0.0185029	-0.003	0.165329	0.0226	54162	0.8941	Alzheimer's disease || ||	7.8001e-12	0.00270404	461460	Body mass index (BMI) || id:ukb-b-19953
rs34517439	A	C	A	C	0.038848	0.046	0.121787	0.0408	54162	0.2596	Alzheimer's disease || ||	3.59998e-37	0.00304983	461460	Body mass index (BMI) || id:ukb-b-19953
rs34696181	C	T	C	T	0.0114345	0.0007	0.476084	0.0156	54162	0.962	Alzheimer's disease || ||	8.10009e-09	0.00198283	461460	Body mass index (BMI) || id:ukb-b-19953
rs349071	A	G	A	G	-0.0133062	0.0091	0.500388	0.0155	54162	0.5556	Alzheimer's disease || ||	1.9002e-11	0.00198231	461460	Body mass index (BMI) || id:ukb-b-19953
rs35154326	G	A	G	A	-0.0130427	0.0101	0.274044	0.019	54162	0.5943	Alzheimer's disease || ||	5.30005e-09	0.00223442	461460	Body mass index (BMI) || id:ukb-b-19953
rs35364449	T	C	T	C	0.0217069	-0.0147	0.109739	0.0406	54162	0.717599	Alzheimer's disease || ||	9.20026e-12	0.00318335	461460	Body mass index (BMI) || id:ukb-b-19953
rs355777	C	G	C	G	0.0152715	0.0119	0.407537	0.0157	54162	0.4503	Alzheimer's disease || ||	3.29989e-14	0.00201314	461460	Body mass index (BMI) || id:ukb-b-19953
rs35697587	A	G	A	G	-0.0164677	-0.0173	0.508121	0.0155	54162	0.2659	Alzheimer's disease || ||	9.20026e-17	0.00198067	461460	Body mass index (BMI) || id:ukb-b-19953
rs35809007	A	G	A	G	-0.0171009	0.0227	0.363205	0.0164	54162	0.1656	Alzheimer's disease || ||	9.09913e-17	0.00205627	461460	Body mass index (BMI) || id:ukb-b-19953
rs35957544	T	G	T	G	-0.0196429	-0.0019	0.574316	0.016	54162	0.9056	Alzheimer's disease || ||	1.10002e-22	0.00200438	461460	Body mass index (BMI) || id:ukb-b-19953
rs36007635	A	G	A	G	-0.021045	-0.0221	0.137698	0.0224	54162	0.3244	Alzheimer's disease || ||	2.19989e-13	0.00286788	461460	Body mass index (BMI) || id:ukb-b-19953
rs36061954	T	C	T	C	0.0128445	0.0161	0.398747	0.0163	54162	0.3248	Alzheimer's disease || ||	2e-10	0.00201928	461460	Body mass index (BMI) || id:ukb-b-19953
rs3764625	G	T	G	T	-0.0117714	-0.0314	0.587594	0.0161	54162	0.0507902	Alzheimer's disease || ||	5.19996e-09	0.00201523	461460	Body mass index (BMI) || id:ukb-b-19953
rs3784710	C	T	C	T	-0.0297067	-0.0156	0.226602	0.0189	54162	0.4078	Alzheimer's disease || ||	2.49977e-36	0.00236042	461460	Body mass index (BMI) || id:ukb-b-19953
rs3803286	G	A	G	A	-0.0186417	0.0214	0.666815	0.0163	54162	0.1891	Alzheimer's disease || ||	6.4003e-19	0.00209828	461460	Body mass index (BMI) || id:ukb-b-19953
rs3807566	T	G	T	G	-0.0120727	-0.0067	0.43832	0.0155	54162	0.664	Alzheimer's disease || ||	1.5e-09	0.00199583	461460	Body mass index (BMI) || id:ukb-b-19953
rs3814883	T	C	T	C	0.0240107	-0.0287	0.482402	0.016	54162	0.0727194	Alzheimer's disease || ||	1e-33	0.00198424	461460	Body mass index (BMI) || id:ukb-b-19953
rs3851998	G	C	G	C	-0.0136071	-0.02	0.743064	0.0179	54162	0.2635	Alzheimer's disease || ||	2e-09	0.00226874	461460	Body mass index (BMI) || id:ukb-b-19953
rs3866805	A	C	A	C	0.0117835	0.0058	0.355683	0.0161	54162	0.7166	Alzheimer's disease || ||	1.2e-08	0.00206546	461460	Body mass index (BMI) || id:ukb-b-19953
rs3897102	T	C	T	C	0.0120838	0.0538	0.411157	0.0167	54162	0.00130401	Alzheimer's disease || ||	2.5e-09	0.00202716	461460	Body mass index (BMI) || id:ukb-b-19953
rs3902951	G	T	G	T	0.0141019	0.0112	0.237151	0.0195	54162	0.5648	Alzheimer's disease || ||	2e-09	0.00235267	461460	Body mass index (BMI) || id:ukb-b-19953
rs3935190	A	G	A	G	-0.0144864	0.0257	0.536784	0.0173	54162	0.1362	Alzheimer's disease || ||	4.00037e-13	0.00199701	461460	Body mass index (BMI) || id:ukb-b-19953
rs394608	C	T	C	T	0.0186353	-0.0041	0.537697	0.0172	54162	0.8112	Alzheimer's disease || ||	9.49948e-21	0.00199484	461460	Body mass index (BMI) || id:ukb-b-19953
rs396755	G	C	G	C	-0.0123639	-0.0074	0.571164	0.0156	54162	0.6348	Alzheimer's disease || ||	6.29999e-10	0.00199937	461460	Body mass index (BMI) || id:ukb-b-19953
rs40071	C	T	C	T	-0.0261666	0.0276	0.179536	0.0203	54162	0.1741	Alzheimer's disease || ||	3.80014e-24	0.00258163	461460	Body mass index (BMI) || id:ukb-b-19953
rs4017425	T	C	T	C	-0.0125817	0.0081	0.470208	0.0155	54162	0.601501	Alzheimer's disease || ||	2.1e-10	0.00198035	461460	Body mass index (BMI) || id:ukb-b-19953
rs4055791	T	C	T	C	-0.0178082	-0.0168	0.416804	0.0159	54162	0.2924	Alzheimer's disease || ||	7.39946e-19	0.00200801	461460	Body mass index (BMI) || id:ukb-b-19953
rs406388	G	C	G	C	0.015973	-0.0155	0.177266	0.0212	54162	0.4648	Alzheimer's disease || ||	8.30004e-10	0.00260181	461460	Body mass index (BMI) || id:ukb-b-19953
rs41279738	G	T	G	T	0.0684263	-0.0044	0.025988	0.0521	54162	0.9329	Alzheimer's disease || ||	4.00037e-28	0.0062225	461460	Body mass index (BMI) || id:ukb-b-19953
rs4148155	G	A	G	A	-0.0229681	0.0165	0.113268	0.0248	54162	0.506001	Alzheimer's disease || ||	1.39991e-13	0.00310659	461460	Body mass index (BMI) || id:ukb-b-19953
rs4261944	G	T	G	T	0.0138553	0.0134	0.364935	0.0166	54162	0.4218	Alzheimer's disease || ||	1.59993e-11	0.00205652	461460	Body mass index (BMI) || id:ukb-b-19953
rs4267103	C	T	C	T	0.0153916	0.0166	0.186347	0.0209	54162	0.4273	Alzheimer's disease || ||	1.40001e-09	0.00254312	461460	Body mass index (BMI) || id:ukb-b-19953
rs4284600	C	T	C	T	0.0119673	0.0003	0.467122	0.0159	54162	0.9837	Alzheimer's disease || ||	2e-09	0.00199506	461460	Body mass index (BMI) || id:ukb-b-19953
rs429343	G	A	G	A	-0.0173795	0.01	0.576573	0.0158	54162	0.5252	Alzheimer's disease || ||	3.29989e-18	0.00199729	461460	Body mass index (BMI) || id:ukb-b-19953
rs429358	C	T	C	T	-0.0266723	1.3503	0.154166	0.0272	54162	1e-200	Alzheimer's disease || ||	2.39994e-22	0.00274373	461460	Body mass index (BMI) || id:ukb-b-19953
rs4307239	G	A	G	A	0.0121413	0.0026	0.458941	0.0162	54162	0.8705	Alzheimer's disease || ||	1e-09	0.00198816	461460	Body mass index (BMI) || id:ukb-b-19953
rs4419475	T	A	T	A	0.011487	0.013	0.407327	0.0161	54162	0.4174	Alzheimer's disease || ||	1.09999e-08	0.0020106	461460	Body mass index (BMI) || id:ukb-b-19953
rs4444317	G	A	G	A	-0.0161604	-0.0233	0.216141	0.0195	54162	0.2331	Alzheimer's disease || ||	2.49977e-11	0.00242104	461460	Body mass index (BMI) || id:ukb-b-19953
rs4456769	T	C	T	C	0.0146111	-0.0198	0.333444	0.0163	54162	0.225	Alzheimer's disease || ||	3.59998e-12	0.00210138	461460	Body mass index (BMI) || id:ukb-b-19953
rs4477562	T	C	T	C	0.0296118	0.0052	0.128644	0.0239	54162	0.8287	Alzheimer's disease || ||	2.90001e-23	0.00298011	461460	Body mass index (BMI) || id:ukb-b-19953
rs45486197	A	G	A	G	0.025766	0.059	0.065685	0.0452	54162	0.1917	Alzheimer's disease || ||	1.7e-10	0.00403737	461460	Body mass index (BMI) || id:ukb-b-19953
rs4605363	C	A	C	A	0.0163638	-0.0105	0.341595	0.0163	54162	0.5214	Alzheimer's disease || ||	3.29989e-15	0.00207733	461460	Body mass index (BMI) || id:ukb-b-19953
rs4648450	A	C	A	C	-0.014837	-0.0113	0.466824	0.0161	54162	0.4832	Alzheimer's disease || ||	8.4004e-14	0.00198775	461460	Body mass index (BMI) || id:ukb-b-19953
rs4658403	T	C	T	C	-0.0188877	-0.0578	0.833659	0.0212	54162	0.00633199	Alzheimer's disease || ||	1e-12	0.00264997	461460	Body mass index (BMI) || id:ukb-b-19953
rs4672338	T	C	T	C	0.0135646	0.0031	0.336228	0.0164	54162	0.8496	Alzheimer's disease || ||	8.00018e-11	0.00208669	461460	Body mass index (BMI) || id:ukb-b-19953
rs4722398	T	C	T	C	0.0186993	-0.0086	0.136137	0.0224	54162	0.701	Alzheimer's disease || ||	7.89951e-11	0.00287545	461460	Body mass index (BMI) || id:ukb-b-19953
rs4737188	T	A	T	A	-0.0124447	-0.0082	0.473864	0.0157	54162	0.6025	Alzheimer's disease || ||	3.50002e-10	0.00198274	461460	Body mass index (BMI) || id:ukb-b-19953
rs4764949	G	A	G	A	-0.0183924	-0.008	0.325892	0.0168	54162	0.6367	Alzheimer's disease || ||	3.10027e-18	0.00211197	461460	Body mass index (BMI) || id:ukb-b-19953
rs4790292	A	C	A	C	-0.0254509	0.0011	0.153693	0.0232	54162	0.961	Alzheimer's disease || ||	2.60016e-20	0.00275603	461460	Body mass index (BMI) || id:ukb-b-19953
rs4820410	G	A	G	A	-0.0177457	0.0045	0.345317	0.0163	54162	0.7819	Alzheimer's disease || ||	1.69981e-17	0.00208527	461460	Body mass index (BMI) || id:ukb-b-19953
rs4832298	T	C	T	C	-0.015965	-0.0334	0.686142	0.0167	54162	0.04559	Alzheimer's disease || ||	5.40008e-14	0.00212268	461460	Body mass index (BMI) || id:ukb-b-19953
rs4858940	C	T	C	T	0.0229281	-0.0052	0.885569	0.0264	54162	0.8432	Alzheimer's disease || ||	1.39991e-13	0.00309976	461460	Body mass index (BMI) || id:ukb-b-19953
rs4876611	G	A	G	A	0.0197549	-0.0345	0.720243	0.0175	54162	0.0483103	Alzheimer's disease || ||	3.29989e-19	0.00220502	461460	Body mass index (BMI) || id:ukb-b-19953
rs4929923	C	T	C	T	0.0189424	0.0192	0.645204	0.0172	54162	0.2648	Alzheimer's disease || ||	4.49987e-20	0.00206436	461460	Body mass index (BMI) || id:ukb-b-19953
rs5011579	G	C	G	C	0.0140268	-0.0025	0.715152	0.0176	54162	0.8852	Alzheimer's disease || ||	1.6e-10	0.00219322	461460	Body mass index (BMI) || id:ukb-b-19953
rs512121	C	T	C	T	-0.0159359	-0.0032	0.192054	0.0196	54162	0.8693	Alzheimer's disease || ||	2.59998e-10	0.00252176	461460	Body mass index (BMI) || id:ukb-b-19953
rs529200	G	A	G	A	0.0168965	-0.0192	0.527829	0.0156	54162	0.218	Alzheimer's disease || ||	1.29987e-17	0.0019785	461460	Body mass index (BMI) || id:ukb-b-19953
rs539515	C	A	C	A	0.0495291	0.0154	0.204942	0.0198	54162	0.4381	Alzheimer's disease || ||	1.99986e-91	0.0024426	461460	Body mass index (BMI) || id:ukb-b-19953
rs55707359	G	T	G	T	0.0531292	-0.0373	0.015432	0.0693	54162	0.590101	Alzheimer's disease || ||	6.20012e-11	0.00812381	461460	Body mass index (BMI) || id:ukb-b-19953
rs55714539	C	A	C	A	0.0175719	0.0038	0.343587	0.0185	54162	0.8363	Alzheimer's disease || ||	6.00067e-17	0.00210043	461460	Body mass index (BMI) || id:ukb-b-19953
rs55726687	A	G	A	G	0.02483	0.0325	0.209709	0.0208	54162	0.1183	Alzheimer's disease || ||	1.39991e-24	0.00242628	461460	Body mass index (BMI) || id:ukb-b-19953
rs55769038	A	G	A	G	0.0160961	0.0049	0.590384	0.0157	54162	0.7526	Alzheimer's disease || ||	1.20005e-15	0.00201096	461460	Body mass index (BMI) || id:ukb-b-19953
rs558887	G	A	G	A	-0.0129976	-0.025	0.307507	0.0171	54162	0.1428	Alzheimer's disease || ||	1.5e-09	0.00214881	461460	Body mass index (BMI) || id:ukb-b-19953
rs559231	T	G	T	G	0.0134907	-0.0337	0.393053	0.0164	54162	0.0392401	Alzheimer's disease || ||	3.40017e-11	0.00203562	461460	Body mass index (BMI) || id:ukb-b-19953
rs55966114	T	C	T	C	0.0145885	0.0151	0.192958	0.0193	54162	0.4342	Alzheimer's disease || ||	6.49995e-09	0.00251342	461460	Body mass index (BMI) || id:ukb-b-19953
rs56038322	A	G	A	G	0.0139276	0.0047	0.31062	0.0181	54162	0.795	Alzheimer's disease || ||	8.99912e-11	0.00214833	461460	Body mass index (BMI) || id:ukb-b-19953
rs56094641	G	A	G	A	0.0734967	0.0025	0.404564	0.0158	54162	0.8725	Alzheimer's disease || ||	1e-200	0.00201412	461460	Body mass index (BMI) || id:ukb-b-19953
rs56133507	G	T	G	T	0.0137622	0.0176	0.196875	0.0209	54162	0.4017	Alzheimer's disease || ||	2.69998e-08	0.00247385	461460	Body mass index (BMI) || id:ukb-b-19953
rs56143236	T	C	T	C	0.0126667	0.0034	0.256388	0.0176	54162	0.8491	Alzheimer's disease || ||	2.30001e-08	0.00226533	461460	Body mass index (BMI) || id:ukb-b-19953
rs56203622	C	T	C	T	0.0179769	0.0286	0.145529	0.0227	54162	0.2068	Alzheimer's disease || ||	1.40001e-10	0.00280183	461460	Body mass index (BMI) || id:ukb-b-19953
rs56352336	C	T	C	T	-0.016327	-0.0173	0.154894	0.0228	54162	0.4495	Alzheimer's disease || ||	2.90001e-09	0.00275021	461460	Body mass index (BMI) || id:ukb-b-19953
rs56399737	T	C	T	C	-0.0161325	0.0121	0.449124	0.0156	54162	0.4392	Alzheimer's disease || ||	6.4003e-16	0.00199646	461460	Body mass index (BMI) || id:ukb-b-19953
rs56858768	A	G	A	G	0.0159188	0.011	0.296861	0.0172	54162	0.5239	Alzheimer's disease || ||	2.39994e-13	0.00217378	461460	Body mass index (BMI) || id:ukb-b-19953
rs56893062	G	T	G	T	0.0125141	-0.0114	0.303342	0.0171	54162	0.506499	Alzheimer's disease || ||	6.19998e-09	0.00215383	461460	Body mass index (BMI) || id:ukb-b-19953
rs56930105	T	C	T	C	0.0157557	0.0241	0.139295	0.0229	54162	0.2923	Alzheimer's disease || ||	3.69999e-08	0.00286187	461460	Body mass index (BMI) || id:ukb-b-19953
rs57636386	C	T	C	T	-0.0412553	0.0208	0.08383	0.0277	54162	0.4523	Alzheimer's disease || ||	1.10002e-30	0.00358326	461460	Body mass index (BMI) || id:ukb-b-19953
rs57989773	C	T	C	T	0.0133488	-0.0028	0.244995	0.0226	54162	0.9018	Alzheimer's disease || ||	1.6e-08	0.00236315	461460	Body mass index (BMI) || id:ukb-b-19953
rs59068084	T	G	T	G	0.0110552	-0.0204	0.410232	0.0169	54162	0.2295	Alzheimer's disease || ||	3.79997e-08	0.00201048	461460	Body mass index (BMI) || id:ukb-b-19953
rs59086897	A	T	A	T	0.033385	-0.0019	0.487541	0.0164	54162	0.9096	Alzheimer's disease || ||	1.99986e-64	0.00196986	461460	Body mass index (BMI) || id:ukb-b-19953
rs59227842	G	A	G	A	0.0229675	0.0219	0.31149	0.017	54162	0.1985	Alzheimer's disease || ||	1.50003e-26	0.00215313	461460	Body mass index (BMI) || id:ukb-b-19953
rs594024	C	T	C	T	-0.0146771	0.0013	0.554162	0.0164	54162	0.9374	Alzheimer's disease || ||	1.69981e-13	0.00199081	461460	Body mass index (BMI) || id:ukb-b-19953
rs6023655	G	A	G	A	-0.0147346	-0.0067	0.765741	0.0184	54162	0.7172	Alzheimer's disease || ||	3.59998e-10	0.00234997	461460	Body mass index (BMI) || id:ukb-b-19953
rs60764613	T	G	T	G	0.02099	0.0077	0.144883	0.0233	54162	0.740699	Alzheimer's disease || ||	1.10002e-13	0.00282688	461460	Body mass index (BMI) || id:ukb-b-19953
rs61740466	A	G	A	G	-0.0135153	-0.0123	0.237203	0.0181	54162	0.499401	Alzheimer's disease || ||	5.60003e-09	0.00231885	461460	Body mass index (BMI) || id:ukb-b-19953
rs61813324	T	C	T	C	0.0290259	-0.0081	0.135728	0.0348	54162	0.8164	Alzheimer's disease || ||	2.80027e-23	0.00292038	461460	Body mass index (BMI) || id:ukb-b-19953
rs61828641	A	G	A	G	0.0224585	0.0204	0.10925	0.0237	54162	0.3907	Alzheimer's disease || ||	1.20005e-12	0.00315913	461460	Body mass index (BMI) || id:ukb-b-19953
rs61871615	T	C	T	C	-0.0267159	0.1455	0.091551	0.0777	54162	0.0613098	Alzheimer's disease || ||	1e-13	0.00359269	461460	Body mass index (BMI) || id:ukb-b-19953
rs61903695	G	A	G	A	0.0166235	0.0161	0.254964	0.0179	54162	0.3668	Alzheimer's disease || ||	2.49977e-13	0.00227115	461460	Body mass index (BMI) || id:ukb-b-19953
rs61992671	G	A	G	A	-0.0161925	0.0357	0.49195	0.0261	54162	0.171	Alzheimer's disease || ||	5.10035e-15	0.00206924	461460	Body mass index (BMI) || id:ukb-b-19953
rs62007782	A	G	A	G	-0.0167007	-0.0048	0.265091	0.0181	54162	0.7907	Alzheimer's disease || ||	9.3994e-14	0.00224215	461460	Body mass index (BMI) || id:ukb-b-19953
rs62020775	A	T	A	T	-0.0165665	0.0054	0.14168	0.0239	54162	0.821	Alzheimer's disease || ||	7.19996e-09	0.0028635	461460	Body mass index (BMI) || id:ukb-b-19953
rs62072006	C	A	C	A	0.0156492	0.0212	0.144541	0.0242	54162	0.3824	Alzheimer's disease || ||	2.99999e-08	0.00282374	461460	Body mass index (BMI) || id:ukb-b-19953
rs62107261	C	T	C	T	-0.0911559	0.0341	0.048327	0.0606	54162	0.5743	Alzheimer's disease || ||	4.60045e-87	0.00460882	461460	Body mass index (BMI) || id:ukb-b-19953
rs62176243	T	A	T	A	-0.0149699	-0.0019	0.244987	0.0182	54162	0.9169	Alzheimer's disease || ||	6.09958e-11	0.00228878	461460	Body mass index (BMI) || id:ukb-b-19953
rs62190049	C	G	C	G	-0.0111798	-0.002	0.390446	0.0166	54162	0.9039	Alzheimer's disease || ||	4e-08	0.00203614	461460	Body mass index (BMI) || id:ukb-b-19953
rs62241847	G	A	G	A	-0.0124263	0.0002	0.314443	0.0168	54162	0.9886	Alzheimer's disease || ||	5.30005e-09	0.00212897	461460	Body mass index (BMI) || id:ukb-b-19953
rs62246311	A	G	A	G	0.0207539	0.0625	0.102364	0.0252	54162	0.0130401	Alzheimer's disease || ||	1.79999e-10	0.00325487	461460	Body mass index (BMI) || id:ukb-b-19953
rs62379271	G	T	G	T	0.0117237	0.0097	0.578511	0.0159	54162	0.5441	Alzheimer's disease || ||	5e-09	0.00200557	461460	Body mass index (BMI) || id:ukb-b-19953
rs62407562	A	T	A	T	0.0144393	-0.0038	0.268584	0.0179	54162	0.8311	Alzheimer's disease || ||	8.49963e-11	0.00222463	461460	Body mass index (BMI) || id:ukb-b-19953
rs6265	T	C	T	C	-0.0399185	0.0215	0.188472	0.0198	54162	0.278	Alzheimer's disease || ||	3.29989e-56	0.00252719	461460	Body mass index (BMI) || id:ukb-b-19953
rs6430068	A	G	A	G	0.0186066	0.0818	0.108559	0.0246	54162	0.00090099	Alzheimer's disease || ||	5.30005e-09	0.0031882	461460	Body mass index (BMI) || id:ukb-b-19953
rs6444950	A	G	A	G	0.0158525	0.0257	0.237474	0.0181	54162	0.1546	Alzheimer's disease || ||	8.30042e-12	0.00232007	461460	Body mass index (BMI) || id:ukb-b-19953
rs6545714	A	G	A	G	-0.0205219	-0.0259	0.601448	0.0159	54162	0.1037	Alzheimer's disease || ||	2.39994e-24	0.00201573	461460	Body mass index (BMI) || id:ukb-b-19953
rs6560906	C	T	C	T	-0.012198	0.0018	0.691874	0.0178	54162	0.9214	Alzheimer's disease || ||	1.2e-08	0.00214136	461460	Body mass index (BMI) || id:ukb-b-19953
rs6561937	A	T	A	T	-0.015934	-0.0027	0.753587	0.019	54162	0.8865	Alzheimer's disease || ||	4.60045e-12	0.00230346	461460	Body mass index (BMI) || id:ukb-b-19953
rs6567160	C	T	C	T	0.0541723	-0.0354	0.232714	0.0184	54162	0.0543701	Alzheimer's disease || ||	2.30144e-118	0.00234213	461460	Body mass index (BMI) || id:ukb-b-19953
rs6575340	A	G	A	G	0.0207333	-0.0189	0.636038	0.0161	54162	0.24	Alzheimer's disease || ||	8.69961e-24	0.00206189	461460	Body mass index (BMI) || id:ukb-b-19953
rs6597975	G	C	G	C	0.013681	0.0414	0.54389	0.018	54162	0.0212799	Alzheimer's disease || ||	7.10068e-12	0.00199532	461460	Body mass index (BMI) || id:ukb-b-19953
rs66679256	T	C	T	C	0.0148864	-0.0232	0.445826	0.0159	54162	0.1453	Alzheimer's disease || ||	6.89922e-14	0.00198759	461460	Body mass index (BMI) || id:ukb-b-19953
rs6669341	G	A	G	A	-0.0170287	-0.0164	0.582679	0.0164	54162	0.3189	Alzheimer's disease || ||	1.59993e-17	0.0019986	461460	Body mass index (BMI) || id:ukb-b-19953
rs6682438	C	T	C	T	0.0131586	0.0086	0.673081	0.0164	54162	0.5983	Alzheimer's disease || ||	3.69999e-10	0.00210047	461460	Body mass index (BMI) || id:ukb-b-19953
rs6705567	C	T	C	T	-0.0146168	0.0245	0.37596	0.0162	54162	0.1311	Alzheimer's disease || ||	9.79941e-13	0.00204919	461460	Body mass index (BMI) || id:ukb-b-19953
rs6707827	G	A	G	A	0.0119437	0.0007	0.703627	0.0169	54162	0.9649	Alzheimer's disease || ||	3.89996e-08	0.00217332	461460	Body mass index (BMI) || id:ukb-b-19953
rs6710091	G	C	G	C	-0.0116835	-0.0557	0.348174	0.0163	54162	0.000644006	Alzheimer's disease || ||	1.6e-08	0.00206707	461460	Body mass index (BMI) || id:ukb-b-19953
rs6713781	C	G	C	G	-0.0135736	-0.0054	0.401882	0.0158	54162	0.7334	Alzheimer's disease || ||	2.19989e-11	0.00202799	461460	Body mass index (BMI) || id:ukb-b-19953
rs6725931	T	C	T	C	0.0191046	0.0368	0.847658	0.0226	54162	0.1032	Alzheimer's disease || ||	3.29989e-12	0.00274403	461460	Body mass index (BMI) || id:ukb-b-19953
rs6744646	G	A	G	A	0.0554684	-0.0353	0.828299	0.02	54162	0.0781106	Alzheimer's disease || ||	4.49987e-100	0.00261213	461460	Body mass index (BMI) || id:ukb-b-19953
rs6752979	A	G	A	G	0.0125235	0.0232	0.31688	0.0167	54162	0.1638	Alzheimer's disease || ||	3.29997e-09	0.00211721	461460	Body mass index (BMI) || id:ukb-b-19953
rs67609008	C	T	C	T	0.0170863	-0.0214	0.283614	0.0187	54162	0.2521	Alzheimer's disease || ||	8.60003e-15	0.0022021	461460	Body mass index (BMI) || id:ukb-b-19953
rs6769617	T	A	T	A	-0.0135754	0.0027	0.66386	0.0165	54162	0.869	Alzheimer's disease || ||	8.10028e-11	0.00208902	461460	Body mass index (BMI) || id:ukb-b-19953
rs6774894	A	T	A	T	0.0133088	-0.0179	0.358148	0.0177	54162	0.3122	Alzheimer's disease || ||	9.70063e-11	0.00205674	461460	Body mass index (BMI) || id:ukb-b-19953
rs6777784	T	G	T	G	0.0116125	0.008	0.61678	0.0167	54162	0.6313	Alzheimer's disease || ||	1e-08	0.00202753	461460	Body mass index (BMI) || id:ukb-b-19953
rs6831088	A	G	A	G	-0.0115222	-0.0189	0.640139	0.0164	54162	0.2487	Alzheimer's disease || ||	2.19999e-08	0.0020591	461460	Body mass index (BMI) || id:ukb-b-19953
rs6843852	T	C	T	C	0.0130897	-0.0094	0.507861	0.0158	54162	0.553	Alzheimer's disease || ||	3.50026e-11	0.00197607	461460	Body mass index (BMI) || id:ukb-b-19953
rs6909685	T	C	T	C	-0.014612	-0.0106	0.326809	0.0174	54162	0.5427	Alzheimer's disease || ||	4.70002e-12	0.00211352	461460	Body mass index (BMI) || id:ukb-b-19953
rs6922607	G	A	G	A	0.0148848	0.0118	0.189847	0.0197	54162	0.5509	Alzheimer's disease || ||	3.2e-09	0.00251479	461460	Body mass index (BMI) || id:ukb-b-19953
rs6938973	C	T	C	T	0.0182223	0.0242	0.601456	0.0157	54162	0.1234	Alzheimer's disease || ||	1.80011e-19	0.00201872	461460	Body mass index (BMI) || id:ukb-b-19953
rs6950388	A	G	A	G	0.0155219	-0.0192	0.795086	0.0258	54162	0.4579	Alzheimer's disease || ||	2.30001e-10	0.00244806	461460	Body mass index (BMI) || id:ukb-b-19953
rs6962980	C	A	C	A	-0.0159568	0.0164	0.556019	0.0158	54162	0.299	Alzheimer's disease || ||	1e-15	0.00198814	461460	Body mass index (BMI) || id:ukb-b-19953
rs698147	G	A	G	A	-0.0128512	0.0075	0.543596	0.0155	54162	0.6262	Alzheimer's disease || ||	9.60064e-11	0.00198514	461460	Body mass index (BMI) || id:ukb-b-19953
rs7024334	G	T	G	T	-0.0138177	-0.0227	0.77914	0.0192	54162	0.2376	Alzheimer's disease || ||	6.69993e-09	0.00238338	461460	Body mass index (BMI) || id:ukb-b-19953
rs7027304	T	C	T	C	0.0145492	-0.0249	0.652661	0.0169	54162	0.1392	Alzheimer's disease || ||	3.10027e-12	0.00208703	461460	Body mass index (BMI) || id:ukb-b-19953
rs7034554	G	A	G	A	-0.0129826	0.0032	0.373825	0.0159	54162	0.8389	Alzheimer's disease || ||	2.1e-10	0.00204252	461460	Body mass index (BMI) || id:ukb-b-19953
rs7038943	C	T	C	T	-0.0140202	0.0026	0.33879	0.016	54162	0.871	Alzheimer's disease || ||	1.80011e-11	0.00208641	461460	Body mass index (BMI) || id:ukb-b-19953
rs704061	C	T	C	T	0.0146374	0.0061	0.45505	0.0158	54162	0.7014	Alzheimer's disease || ||	1.69981e-13	0.00198552	461460	Body mass index (BMI) || id:ukb-b-19953
rs705158	A	T	A	T	0.0155952	0.0113	0.244747	0.0177	54162	0.5229	Alzheimer's disease || ||	1.29987e-11	0.00230446	461460	Body mass index (BMI) || id:ukb-b-19953
rs7081254	C	T	C	T	-0.0142516	-0.0242	0.205739	0.0192	54162	0.2065	Alzheimer's disease || ||	6.19998e-09	0.00245216	461460	Body mass index (BMI) || id:ukb-b-19953
rs7124681	A	C	A	C	0.0256977	-0.0614	0.408353	0.0157	54162	9.44604e-05	Alzheimer's disease || ||	1.50003e-37	0.0020063	461460	Body mass index (BMI) || id:ukb-b-19953
rs7132908	A	G	A	G	0.0297904	0.0041	0.384458	0.0168	54162	0.8083	Alzheimer's disease || ||	1.39991e-48	0.00203363	461460	Body mass index (BMI) || id:ukb-b-19953
rs71495038	A	G	A	G	0.0277998	-0.007	0.076936	0.0292	54162	0.8095	Alzheimer's disease || ||	6.70039e-14	0.00370969	461460	Body mass index (BMI) || id:ukb-b-19953
rs7201895	A	G	A	G	-0.0149781	0.0192	0.354291	0.0171	54162	0.2629	Alzheimer's disease || ||	6.00067e-13	0.00207999	461460	Body mass index (BMI) || id:ukb-b-19953
rs7206608	G	C	G	C	0.0135122	0.0116	0.32162	0.0169	54162	0.4933	Alzheimer's disease || ||	1.79999e-10	0.00211797	461460	Body mass index (BMI) || id:ukb-b-19953
rs7218014	C	T	C	T	0.0189524	-0.0031	0.197305	0.0193	54162	0.8727	Alzheimer's disease || ||	2.90001e-14	0.00249216	461460	Body mass index (BMI) || id:ukb-b-19953
rs7232171	T	G	T	G	0.0123404	0.0082	0.58263	0.0161	54162	0.611899	Alzheimer's disease || ||	8e-10	0.00200821	461460	Body mass index (BMI) || id:ukb-b-19953
rs723672	T	C	T	C	0.0111273	-0.0118	0.43151	0.0172	54162	0.4933	Alzheimer's disease || ||	2.99999e-08	0.00200698	461460	Body mass index (BMI) || id:ukb-b-19953
rs7250833	T	C	T	C	0.0135041	-0.0191	0.288866	0.0175	54162	0.2738	Alzheimer's disease || ||	6.69993e-10	0.002188	461460	Body mass index (BMI) || id:ukb-b-19953
rs7259070	C	T	C	T	0.021869	-0.0033	0.596062	0.0192	54162	0.8633	Alzheimer's disease || ||	6.59933e-27	0.00203628	461460	Body mass index (BMI) || id:ukb-b-19953
rs72649373	C	T	C	T	0.0178062	-0.0427	0.143188	0.0228	54162	0.0611294	Alzheimer's disease || ||	6.1e-10	0.00287805	461460	Body mass index (BMI) || id:ukb-b-19953
rs72673947	G	A	G	A	0.0218864	-0.0255	0.107031	0.0258	54162	0.3242	Alzheimer's disease || ||	9.8992e-12	0.00321496	461460	Body mass index (BMI) || id:ukb-b-19953
rs72976986	A	G	A	G	-0.0232257	0.0028	0.190123	0.022	54162	0.8989	Alzheimer's disease || ||	7.59976e-20	0.00254712	461460	Body mass index (BMI) || id:ukb-b-19953
rs73026725	A	C	A	C	-0.022318	-0.0175	0.153534	0.0218	54162	0.4218	Alzheimer's disease || ||	4.90004e-16	0.00275052	461460	Body mass index (BMI) || id:ukb-b-19953
rs73052033	C	T	C	T	-0.0303929	-0.0295	0.18493	0.0206	54162	0.1514	Alzheimer's disease || ||	7.70016e-33	0.00254634	461460	Body mass index (BMI) || id:ukb-b-19953
rs7306534	A	G	A	G	-0.0112754	0.0118	0.621712	0.0164	54162	0.4727	Alzheimer's disease || ||	4.09996e-08	0.00205437	461460	Body mass index (BMI) || id:ukb-b-19953
rs73124396	C	T	C	T	-0.0154472	0.0318	0.205144	0.019	54162	0.09448	Alzheimer's disease || ||	3.09999e-10	0.0024548	461460	Body mass index (BMI) || id:ukb-b-19953
rs73142879	T	C	T	C	-0.0266936	-0.007	0.192297	0.0203	54162	0.73	Alzheimer's disease || ||	3.59998e-26	0.00252257	461460	Body mass index (BMI) || id:ukb-b-19953
rs73193736	G	A	G	A	-0.0177165	0.0138	0.243934	0.0183	54162	0.4523	Alzheimer's disease || ||	2.19989e-14	0.00232002	461460	Body mass index (BMI) || id:ukb-b-19953
rs73213484	T	A	T	A	-0.0225766	0.0056	0.141236	0.0215	54162	0.7941	Alzheimer's disease || ||	1.69981e-15	0.0028364	461460	Body mass index (BMI) || id:ukb-b-19953
rs7331420	A	G	A	G	-0.0143702	-0.0069	0.285276	0.017	54162	0.6851	Alzheimer's disease || ||	6.59933e-11	0.00220081	461460	Body mass index (BMI) || id:ukb-b-19953
rs7357754	G	A	G	A	0.0141146	0.0071	0.500139	0.0159	54162	0.6556	Alzheimer's disease || ||	1.10002e-12	0.00198362	461460	Body mass index (BMI) || id:ukb-b-19953
rs73601548	T	C	T	C	0.0177354	0.0448	0.114527	0.0276	54162	0.1042	Alzheimer's disease || ||	1.29999e-08	0.00311639	461460	Body mass index (BMI) || id:ukb-b-19953
rs73985439	C	A	C	A	0.0136616	-0.0273	0.307299	0.0172	54162	0.1118	Alzheimer's disease || ||	1.7e-10	0.00214059	461460	Body mass index (BMI) || id:ukb-b-19953
rs745249	T	C	T	C	0.0176118	0.0305	0.281945	0.018	54162	0.0897098	Alzheimer's disease || ||	1.10002e-15	0.00219724	461460	Body mass index (BMI) || id:ukb-b-19953
rs74750282	C	T	C	T	-0.0196382	0.0213	0.086623	0.0345	54162	0.5374	Alzheimer's disease || ||	2.5e-08	0.00352561	461460	Body mass index (BMI) || id:ukb-b-19953
rs7498665	G	A	G	A	0.0268646	-0.0223	0.399659	0.0162	54162	0.1679	Alzheimer's disease || ||	2.29985e-40	0.00201997	461460	Body mass index (BMI) || id:ukb-b-19953
rs7516554	T	C	T	C	0.0120066	0.0134	0.399941	0.0157	54162	0.3953	Alzheimer's disease || ||	2.59998e-09	0.00201565	461460	Body mass index (BMI) || id:ukb-b-19953
rs7519259	A	G	A	G	0.0140028	0.039	0.52836	0.0155	54162	0.0117501	Alzheimer's disease || ||	1.69981e-12	0.00198381	461460	Body mass index (BMI) || id:ukb-b-19953
rs7539903	A	T	A	T	-0.0131691	-0.0143	0.615562	0.0163	54162	0.3806	Alzheimer's disease || ||	8.30042e-11	0.0020273	461460	Body mass index (BMI) || id:ukb-b-19953
rs754635	G	C	G	C	0.0219925	0.0169	0.886582	0.0247	54162	0.494899	Alzheimer's disease || ||	1.50003e-12	0.0031093	461460	Body mass index (BMI) || id:ukb-b-19953
rs75499503	T	C	T	C	-0.0180331	-0.0041	0.220101	0.0193	54162	0.8315	Alzheimer's disease || ||	8.9002e-14	0.00241845	461460	Body mass index (BMI) || id:ukb-b-19953
rs7568228	C	G	C	G	-0.0119625	0.0054	0.52717	0.0158	54162	0.7347	Alzheimer's disease || ||	1.29999e-09	0.00197288	461460	Body mass index (BMI) || id:ukb-b-19953
rs7571496	G	A	G	A	-0.0158916	-0.0249	0.260545	0.0173	54162	0.1502	Alzheimer's disease || ||	1.80011e-12	0.00225454	461460	Body mass index (BMI) || id:ukb-b-19953
rs76183894	C	T	C	T	-0.0219584	0.0151	0.080747	0.0276	54162	0.5848	Alzheimer's disease || ||	1.7e-09	0.00364437	461460	Body mass index (BMI) || id:ukb-b-19953
rs7619139	A	T	A	T	0.0134537	0.0065	0.588616	0.0163	54162	0.690501	Alzheimer's disease || ||	2.19989e-11	0.00201061	461460	Body mass index (BMI) || id:ukb-b-19953
rs765874	A	T	A	T	-0.0120592	-0.011	0.489362	0.0157	54162	0.4804	Alzheimer's disease || ||	1e-09	0.00197569	461460	Body mass index (BMI) || id:ukb-b-19953
rs76702514	G	C	G	C	-0.0164862	-0.0366	0.210623	0.0192	54162	0.0567401	Alzheimer's disease || ||	1.20005e-11	0.00243278	461460	Body mass index (BMI) || id:ukb-b-19953
rs7683836	A	G	A	G	-0.0122469	0.001	0.557215	0.0162	54162	0.9532	Alzheimer's disease || ||	8.19993e-10	0.00199427	461460	Body mass index (BMI) || id:ukb-b-19953
rs7704382	G	C	G	C	0.0120126	-0.0004	0.433528	0.0158	54162	0.9816	Alzheimer's disease || ||	1.79999e-09	0.00199631	461460	Body mass index (BMI) || id:ukb-b-19953
rs7708584	G	A	G	A	-0.0159321	0.0246	0.572344	0.0155	54162	0.1132	Alzheimer's disease || ||	1.39991e-15	0.0019949	461460	Body mass index (BMI) || id:ukb-b-19953
rs7761673	A	T	A	T	-0.0135915	-0.0064	0.21988	0.0192	54162	0.7399	Alzheimer's disease || ||	1.29999e-08	0.0023901	461460	Body mass index (BMI) || id:ukb-b-19953
rs7762794	G	A	G	A	0.0149077	-0.0054	0.285408	0.0172	54162	0.754699	Alzheimer's disease || ||	9.09913e-12	0.00218606	461460	Body mass index (BMI) || id:ukb-b-19953
rs7774	A	C	A	C	0.014988	0.0368	0.310467	0.0174	54162	0.0344302	Alzheimer's disease || ||	3.29989e-12	0.00215169	461460	Body mass index (BMI) || id:ukb-b-19953
rs7776021	A	G	A	G	0.0123701	0.0005	0.287599	0.0174	54162	0.9751	Alzheimer's disease || ||	1.40001e-08	0.00218251	461460	Body mass index (BMI) || id:ukb-b-19953
rs7802342	G	T	G	T	0.0122748	0.0263	0.288566	0.018	54162	0.1435	Alzheimer's disease || ||	1.79999e-08	0.00218145	461460	Body mass index (BMI) || id:ukb-b-19953
rs7805441	T	C	T	C	0.0133747	0.03	0.502261	0.0158	54162	0.0577298	Alzheimer's disease || ||	1.80011e-11	0.00198884	461460	Body mass index (BMI) || id:ukb-b-19953
rs78086698	C	T	C	T	0.0318357	0.0113	0.039838	0.0423	54162	0.789	Alzheimer's disease || ||	3.59998e-10	0.0050761	461460	Body mass index (BMI) || id:ukb-b-19953
rs784257	C	T	C	T	0.0179315	-0.0013	0.812541	0.0206	54162	0.9486	Alzheimer's disease || ||	1.99986e-12	0.00254968	461460	Body mass index (BMI) || id:ukb-b-19953
rs78605811	C	A	C	A	-0.032737	0.013	0.05405	0.0408	54162	0.750699	Alzheimer's disease || ||	1.80011e-13	0.00444673	461460	Body mass index (BMI) || id:ukb-b-19953
rs7893571	T	G	T	G	0.0140553	-0.0028	0.665897	0.0171	54162	0.8699	Alzheimer's disease || ||	2.29985e-11	0.00210152	461460	Body mass index (BMI) || id:ukb-b-19953
rs7924036	T	G	T	G	-0.0142836	-0.0089	0.503265	0.0157	54162	0.5713	Alzheimer's disease || ||	5.10035e-13	0.0019778	461460	Body mass index (BMI) || id:ukb-b-19953
rs7925100	A	G	A	G	0.014725	0.0055	0.396117	0.0159	54162	0.730999	Alzheimer's disease || ||	3.29989e-13	0.0020221	461460	Body mass index (BMI) || id:ukb-b-19953
rs7928320	G	C	T	C	0.0243383	0.0138	0.056563	0.019	54162	0.4675	Alzheimer's disease || ||	1.29999e-08	0.00428501	461460	Body mass index (BMI) || id:ukb-b-19953
rs7944782	G	T	G	T	0.0157606	-0.022	0.509784	0.017	54162	0.1949	Alzheimer's disease || ||	2.19989e-15	0.00198748	461460	Body mass index (BMI) || id:ukb-b-19953
rs7947143	A	G	A	G	-0.0182782	0.0293	0.163483	0.0209	54162	0.1612	Alzheimer's disease || ||	8.30042e-12	0.00267522	461460	Body mass index (BMI) || id:ukb-b-19953
rs79780963	T	C	T	C	0.0236803	-0.0206	0.077428	0.0288	54162	0.4744	Alzheimer's disease || ||	1.5e-10	0.00369591	461460	Body mass index (BMI) || id:ukb-b-19953
rs7996639	A	G	A	G	0.0145559	-0.0137	0.449354	0.0155	54162	0.3765	Alzheimer's disease || ||	3.59998e-13	0.00200245	461460	Body mass index (BMI) || id:ukb-b-19953
rs8015400	A	C	A	C	0.0213422	0.0076	0.677097	0.0163	54162	0.639501	Alzheimer's disease || ||	6.70039e-24	0.00211709	461460	Body mass index (BMI) || id:ukb-b-19953
rs8020365	A	T	A	T	0.0251068	0.0045	0.220464	0.0202	54162	0.8235	Alzheimer's disease || ||	1e-25	0.00239517	461460	Body mass index (BMI) || id:ukb-b-19953
rs8024137	T	A	T	A	0.0156329	0.007	0.848207	0.0223	54162	0.752501	Alzheimer's disease || ||	1.6e-08	0.00276778	461460	Body mass index (BMI) || id:ukb-b-19953
rs8025516	G	T	G	T	-0.0146558	-0.008	0.645928	0.0161	54162	0.6206	Alzheimer's disease || ||	1.69981e-12	0.00207578	461460	Body mass index (BMI) || id:ukb-b-19953
rs8076669	C	T	C	T	0.0140681	-0.0007	0.561561	0.0157	54162	0.9664	Alzheimer's disease || ||	1.80011e-12	0.00199601	461460	Body mass index (BMI) || id:ukb-b-19953
rs8089514	A	T	A	T	0.012988	0.0327	0.36868	0.017	54162	0.0548403	Alzheimer's disease || ||	3.89996e-10	0.00207588	461460	Body mass index (BMI) || id:ukb-b-19953
rs8112818	G	A	G	A	-0.020696	0.0256	0.400329	0.0167	54162	0.1244	Alzheimer's disease || ||	1.80011e-24	0.00202712	461460	Body mass index (BMI) || id:ukb-b-19953
rs8132491	A	G	A	G	-0.015375	0.0218	0.313023	0.0199	54162	0.2732	Alzheimer's disease || ||	2.39994e-12	0.00219317	461460	Body mass index (BMI) || id:ukb-b-19953
rs815163	C	T	C	T	-0.016485	-0.0081	0.563148	0.0155	54162	0.6002	Alzheimer's disease || ||	1e-16	0.00198582	461460	Body mass index (BMI) || id:ukb-b-19953
rs852042	G	A	G	A	-0.0131207	0.0318	0.758575	0.0183	54162	0.0818408	Alzheimer's disease || ||	1.40001e-08	0.00231309	461460	Body mass index (BMI) || id:ukb-b-19953
rs879620	T	C	T	C	0.0241136	-0.021	0.613237	0.0168	54162	0.2106	Alzheimer's disease || ||	2.29985e-32	0.00203595	461460	Body mass index (BMI) || id:ukb-b-19953
rs909001	G	C	G	C	0.0160597	0.0554	0.17211	0.0221	54162	0.01243	Alzheimer's disease || ||	8e-10	0.00261353	461460	Body mass index (BMI) || id:ukb-b-19953
rs909892	A	G	A	G	-0.0184105	0.0086	0.134817	0.0224	54162	0.7009	Alzheimer's disease || ||	2.59998e-10	0.00291255	461460	Body mass index (BMI) || id:ukb-b-19953
rs923994	G	A	G	A	-0.0145761	-0.0134	0.783195	0.0187	54162	0.4727	Alzheimer's disease || ||	1.29999e-09	0.00240219	461460	Body mass index (BMI) || id:ukb-b-19953
rs9291822	T	C	T	C	-0.014263	-0.0154	0.514868	0.0155	54162	0.3209	Alzheimer's disease || ||	8.60003e-13	0.00199464	461460	Body mass index (BMI) || id:ukb-b-19953
rs9294260	A	G	A	G	0.014782	-0.015	0.476559	0.0158	54162	0.3427	Alzheimer's disease || ||	1e-13	0.00198818	461460	Body mass index (BMI) || id:ukb-b-19953
rs9349235	T	C	T	C	0.0111809	0.0032	0.410635	0.0157	54162	0.8397	Alzheimer's disease || ||	2.59998e-08	0.00200924	461460	Body mass index (BMI) || id:ukb-b-19953
rs935166	A	G	A	G	-0.0161066	-0.0072	0.506805	0.0159	54162	0.6519	Alzheimer's disease || ||	3.19963e-16	0.00197292	461460	Body mass index (BMI) || id:ukb-b-19953
rs9388446	A	T	A	T	0.0111013	0.0179	0.515653	0.0155	54162	0.2474	Alzheimer's disease || ||	2e-08	0.00197919	461460	Body mass index (BMI) || id:ukb-b-19953
rs9463175	T	C	T	C	-0.0115	0.0221	0.338958	0.0169	54162	0.1901	Alzheimer's disease || ||	4.39997e-08	0.00210115	461460	Body mass index (BMI) || id:ukb-b-19953
rs9478496	C	T	C	T	0.0181836	0.0062	0.164225	0.0215	54162	0.771699	Alzheimer's disease || ||	1.10002e-11	0.00267493	461460	Body mass index (BMI) || id:ukb-b-19953
rs9515446	G	A	G	A	0.0151051	-0.0132	0.447709	0.0157	54162	0.3986	Alzheimer's disease || ||	3.19963e-14	0.00199052	461460	Body mass index (BMI) || id:ukb-b-19953
rs9522180	T	C	T	C	-0.0141095	-0.0068	0.553392	0.0165	54162	0.6804	Alzheimer's disease || ||	1.50003e-12	0.00199325	461460	Body mass index (BMI) || id:ukb-b-19953
rs9571687	A	C	A	C	-0.0135388	0.0103	0.329363	0.0165	54162	0.5324	Alzheimer's disease || ||	1.40001e-10	0.0021094	461460	Body mass index (BMI) || id:ukb-b-19953
rs961498	C	G	C	G	0.011981	-0.0029	0.503131	0.0164	54162	0.8605	Alzheimer's disease || ||	1.79999e-09	0.00199336	461460	Body mass index (BMI) || id:ukb-b-19953
rs9638713	G	A	G	A	-0.0361735	0.0777	0.97477	0.058	54162	0.1802	Alzheimer's disease || ||	1.2e-08	0.00635399	461460	Body mass index (BMI) || id:ukb-b-19953
rs9673839	G	A	G	A	0.0130337	0.0057	0.490967	0.0162	54162	0.723901	Alzheimer's disease || ||	5.50047e-11	0.00198783	461460	Body mass index (BMI) || id:ukb-b-19953
rs9674487	G	C	T	C	0.158445	-0.0702	0.001338	0.0411	54162	0.0875004	Alzheimer's disease || ||	3.09999e-08	0.0286171	461460	Body mass index (BMI) || id:ukb-b-19953
rs9830592	A	C	A	C	0.0154849	-0.0219	0.582421	0.0158	54162	0.1655	Alzheimer's disease || ||	1e-14	0.00200164	461460	Body mass index (BMI) || id:ukb-b-19953
rs9839081	A	G	A	G	-0.011701	-0.0103	0.325232	0.0178	54162	0.5622	Alzheimer's disease || ||	4.60002e-08	0.00214045	461460	Body mass index (BMI) || id:ukb-b-19953
rs9843653	C	T	C	T	0.0294509	0.0085	0.511652	0.0156	54162	0.5838	Alzheimer's disease || ||	2.90001e-50	0.00197538	461460	Body mass index (BMI) || id:ukb-b-19953
rs9876664	T	G	T	G	-0.0180478	-0.0031	0.375389	0.0158	54162	0.8423	Alzheimer's disease || ||	9.60064e-19	0.00204174	461460	Body mass index (BMI) || id:ukb-b-19953
rs9888533	T	C	T	C	0.0120038	-0.013	0.538079	0.0218	54162	0.5506	Alzheimer's disease || ||	2.69998e-09	0.0020182	461460	Body mass index (BMI) || id:ukb-b-19953
rs9926784	C	T	C	T	-0.023818	-0.063	0.184576	0.0203	54162	0.001894	Alzheimer's disease || ||	8.60003e-21	0.00254677	461460	Body mass index (BMI) || id:ukb-b-19953
rs9951619	G	T	G	T	0.0144231	0.0115	0.767369	0.0187	54162	0.5387	Alzheimer's disease || ||	9.49992e-10	0.00235777	461460	Body mass index (BMI) || id:ukb-b-19953
rs10019888	G	A	G	A	-0.027	-0.0022	0.1636	0.0208	54162	0.9173	Alzheimer's disease || ||	4.90095e-08	0.0046	187077	HDL cholesterol || id:ieu-a-299
rs10087900	A	G	A	G	-0.0231	0.0048	0.4393	0.0163	54162	0.770699	Alzheimer's disease || ||	2.174e-09	0.0036	183672	HDL cholesterol || id:ieu-a-299
rs102275	C	T	C	T	-0.0391	-0.0098	0.372	0.0167	54162	0.5583	Alzheimer's disease || ||	6.40472e-28	0.0035	187085	HDL cholesterol || id:ieu-a-299
rs103294	T	C	T	C	0.0523	0.0225	0.186	0.0208	54162	0.2793	Alzheimer's disease || ||	3.99485e-30	0.0044	175917	HDL cholesterol || id:ieu-a-299
rs10468017	T	C	T	C	0.1179	-0.0317	0.2757	0.018	54162	0.0782708	Alzheimer's disease || ||	1.2106e-188	0.0038	181223	HDL cholesterol || id:ieu-a-299
rs1047891	A	C	A	C	-0.0269	-0.0154	0.3021	0.0195	54162	0.4316	Alzheimer's disease || ||	8.72991e-10	0.0039	182043	HDL cholesterol || id:ieu-a-299
rs10761771	C	T	C	T	0.0198	-0.0139	0.467	0.0154	54162	0.3681	Alzheimer's disease || ||	4.12003e-09	0.0034	182895	HDL cholesterol || id:ieu-a-299
rs10808546	T	C	T	C	0.0409	-0.0202	0.4459	0.0162	54162	0.2109	Alzheimer's disease || ||	4.10582e-30	0.0034	185835	HDL cholesterol || id:ieu-a-299
rs11045163	G	A	G	A	0.0217	0.0021	0.4063	0.0162	54162	0.8993	Alzheimer's disease || ||	3.19602e-09	0.0035	187075	HDL cholesterol || id:ieu-a-299
rs11065987	G	A	G	A	-0.0222	-0.0123	0.4222	0.0159	54162	0.4368	Alzheimer's disease || ||	1.22501e-09	0.0035	187119	HDL cholesterol || id:ieu-a-299
rs11765979	C	A	C	A	0.0412	0.001	0.4578	0.0159	54162	0.9502	Alzheimer's disease || ||	3.111e-17	0.0048	94311	HDL cholesterol || id:ieu-a-299
rs11789603	T	C	T	C	0.06	0.0209	0.08971	0.0263	54162	0.4274	Alzheimer's disease || ||	3.69488e-21	0.006	184432	HDL cholesterol || id:ieu-a-299
rs12133576	G	A	G	A	-0.0243	0.0316	0.6451	0.0169	54162	0.0612604	Alzheimer's disease || ||	6.15035e-11	0.0035	187123	HDL cholesterol || id:ieu-a-299
rs12145743	G	T	G	T	0.0203	0.0253	0.3311	0.0167	54162	0.129	Alzheimer's disease || ||	1.80302e-08	0.0036	181336	HDL cholesterol || id:ieu-a-299
rs12412743	T	C	T	C	-0.0291	0.0105	0.153	0.0213	54162	0.6234	Alzheimer's disease || ||	1.30701e-09	0.0045	187095	HDL cholesterol || id:ieu-a-299
rs12740374	T	G	T	G	0.0343	0.0004	0.2124	0.0188	54162	0.9811	Alzheimer's disease || ||	1.68694e-15	0.0041	186888	HDL cholesterol || id:ieu-a-299
rs12748152	T	C	T	C	-0.0506	0.0344	0.07124	0.0295	54162	0.2429	Alzheimer's disease || ||	9.73644e-16	0.0062	187057	HDL cholesterol || id:ieu-a-299
rs12801636	A	G	A	G	0.0235	-0.0118	0.2243	0.0185	54162	0.5242	Alzheimer's disease || ||	3.14702e-08	0.0042	187099	HDL cholesterol || id:ieu-a-299
rs13076253	C	A	C	A	-0.0283	-0.002	0.1478	0.0224	54162	0.9274	Alzheimer's disease || ||	4.96101e-09	0.0048	186809	HDL cholesterol || id:ieu-a-299
rs13099479	A	G	A	G	0.036	-0.001	0.08971	0.0273	54162	0.9722	Alzheimer's disease || ||	1.81899e-08	0.0062	187132	HDL cholesterol || id:ieu-a-299
rs13107325	T	C	T	C	-0.0708	0.0509	0.07784	0.0308	54162	0.0982607	Alzheimer's disease || ||	1.06488e-15	0.0078	179316	HDL cholesterol || id:ieu-a-299
rs13702	C	T	C	T	0.1058	0.0071	0.3127	0.0173	54162	0.6798	Alzheimer's disease || ||	1.27938e-160	0.0038	187044	HDL cholesterol || id:ieu-a-299
rs1515110	T	G	T	G	-0.0323	0.0109	0.6187	0.0164	54162	0.506001	Alzheimer's disease || ||	8.03711e-18	0.0035	187081	HDL cholesterol || id:ieu-a-299
rs1689797	A	C	A	C	-0.0358	0.0058	0.3021	0.0162	54162	0.7205	Alzheimer's disease || ||	2.85167e-21	0.0036	187126	HDL cholesterol || id:ieu-a-299
rs16942887	A	G	A	G	0.0831	0.0046	0.1332	0.0237	54162	0.8452	Alzheimer's disease || ||	8.28133e-54	0.0051	185604	HDL cholesterol || id:ieu-a-299
rs16965220	A	C	A	C	0.0219	0.0296	0.2982	0.0168	54162	0.0783394	Alzheimer's disease || ||	7.90897e-09	0.0037	185512	HDL cholesterol || id:ieu-a-299
rs17145738	T	C	T	C	0.0408	0.0255	0.1174	0.0243	54162	0.2943	Alzheimer's disease || ||	4.95222e-13	0.0053	184971	HDL cholesterol || id:ieu-a-299
rs17173637	C	T	C	T	-0.0363	0.0143	0.09763	0.0283	54162	0.6142	Alzheimer's disease || ||	1.89898e-08	0.0057	183901	HDL cholesterol || id:ieu-a-299
rs181360	G	T	G	T	-0.0376	-0.0699	0.1992	0.0203	54162	0.000585801	Alzheimer's disease || ||	9.23847e-18	0.0042	178216	HDL cholesterol || id:ieu-a-299
rs1866956	T	C	T	C	0.0217	0.0093	0.6755	0.0175	54162	0.5944	Alzheimer's disease || ||	7.96398e-10	0.0037	187031	HDL cholesterol || id:ieu-a-299
rs1877031	A	G	A	G	0.0336	0.014	0.6755	0.0163	54162	0.388	Alzheimer's disease || ||	1.20393e-19	0.0036	185471	HDL cholesterol || id:ieu-a-299
rs1883025	T	C	T	C	-0.0698	0.0705	0.2427	0.0182	54162	0.0001037	Alzheimer's disease || ||	1.49589e-65	0.0041	186365	HDL cholesterol || id:ieu-a-299
rs1936800	T	C	T	C	-0.02	0.0061	0.4723	0.0157	54162	0.6995	Alzheimer's disease || ||	3.05499e-10	0.0034	187111	HDL cholesterol || id:ieu-a-299
rs2013208	T	C	T	C	0.0254	-0.0174	0.5053	0.016	54162	0.278	Alzheimer's disease || ||	8.91661e-12	0.0036	169708	HDL cholesterol || id:ieu-a-299
rs205262	G	A	G	A	-0.0283	0.0069	0.2665	0.0171	54162	0.6883	Alzheimer's disease || ||	3.87793e-13	0.0039	181707	HDL cholesterol || id:ieu-a-299
rs2066714	C	T	C	T	0.0453	-0.082	0.1201	0.0332	54162	0.0133999	Alzheimer's disease || ||	7.25805e-10	0.0071	93528	HDL cholesterol || id:ieu-a-299
rs2075650	G	A	G	A	-0.0554	1.0415	0.1266	0.0226	54162	1e-200	Alzheimer's disease || ||	9.71628e-26	0.0051	175421	HDL cholesterol || id:ieu-a-299
rs2241210	G	A	G	A	0.0332	0.021	0.5528	0.0153	54162	0.1717	Alzheimer's disease || ||	2.48886e-20	0.0035	174782	HDL cholesterol || id:ieu-a-299
rs2241770	C	T	C	T	-0.0989	-0.0345	0.1029	0.0268	54162	0.1982	Alzheimer's disease || ||	6.78422e-60	0.0057	185537	HDL cholesterol || id:ieu-a-299
rs2250802	A	G	A	G	-0.034	-0.0117	0.6807	0.0168	54162	0.4866	Alzheimer's disease || ||	2.02209e-17	0.0038	184088	HDL cholesterol || id:ieu-a-299
rs2278236	A	G	A	G	0.0331	-0.0289	0.5435	0.0162	54162	0.0751502	Alzheimer's disease || ||	3.18493e-18	0.0035	185450	HDL cholesterol || id:ieu-a-299
rs2288912	G	C	G	C	0.0297	0.1152	0.4987	0.0165	54162	3.01717e-12	Alzheimer's disease || ||	7.14825e-15	0.0036	178910	HDL cholesterol || id:ieu-a-299
rs2290547	A	G	A	G	-0.0297	-0.0015	0.2111	0.0209	54162	0.9435	Alzheimer's disease || ||	3.69003e-09	0.0046	187142	HDL cholesterol || id:ieu-a-299
rs2293889	G	T	G	T	0.0312	0.0305	0.5871	0.0164	54162	0.0621799	Alzheimer's disease || ||	4.27071e-17	0.0035	180102	HDL cholesterol || id:ieu-a-299
rs2454722	G	A	G	A	0.0351	-0.0376	0.1451	0.0198	54162	0.0577006	Alzheimer's disease || ||	3.30826e-14	0.0044	186355	HDL cholesterol || id:ieu-a-299
rs2602836	G	A	G	A	-0.0192	0.0242	0.5726	0.0156	54162	0.1208	Alzheimer's disease || ||	4.96398e-08	0.0034	187102	HDL cholesterol || id:ieu-a-299
rs2606736	T	C	T	C	-0.0246	-0.0011	0.6055	0.0165	54162	0.9457	Alzheimer's disease || ||	4.79899e-08	0.0043	129328	HDL cholesterol || id:ieu-a-299
rs2642438	G	A	G	A	0.0303	0.0055	0.7454	0.0186	54162	0.7673	Alzheimer's disease || ||	7.78037e-14	0.0039	179439	HDL cholesterol || id:ieu-a-299
rs2925979	C	T	C	T	0.0351	-0.0063	0.7045	0.0175	54162	0.7195	Alzheimer's disease || ||	1.32099e-19	0.0037	185553	HDL cholesterol || id:ieu-a-299
rs3741414	T	C	T	C	0.0296	0.0093	0.1913	0.0193	54162	0.629901	Alzheimer's disease || ||	6.09537e-14	0.004	187090	HDL cholesterol || id:ieu-a-299
rs3822072	A	G	A	G	-0.0251	0.0096	0.4881	0.0157	54162	0.5413	Alzheimer's disease || ||	4.05789e-12	0.0034	187115	HDL cholesterol || id:ieu-a-299
rs3847502	A	C	A	C	0.048	0.0004	0.314	0.0175	54162	0.981	Alzheimer's disease || ||	3.30598e-38	0.0036	187050	HDL cholesterol || id:ieu-a-299
rs3861397	G	A	G	A	-0.024	0.0091	0.3417	0.0172	54162	0.5983	Alzheimer's disease || ||	8.4004e-11	0.0036	187084	HDL cholesterol || id:ieu-a-299
rs4142995	T	G	T	G	-0.0263	-0.0145	0.3839	0.0161	54162	0.3682	Alzheimer's disease || ||	9.36483e-12	0.0037	165161	HDL cholesterol || id:ieu-a-299
rs4148005	G	T	G	T	-0.0283	-0.009	0.2995	0.0168	54162	0.589899	Alzheimer's disease || ||	5.74249e-14	0.0036	184431	HDL cholesterol || id:ieu-a-299
rs4240624	A	G	A	G	0.0818	-0.013	0.9248	0.0279	54162	0.6399	Alzheimer's disease || ||	1.32312e-45	0.0058	185696	HDL cholesterol || id:ieu-a-299
rs424346	T	C	T	C	0.0679	-0.0688	0.04881	0.0476	54162	0.1483	Alzheimer's disease || ||	4.84005e-08	0.0113	128346	HDL cholesterol || id:ieu-a-299
rs4379922	C	T	C	T	0.0247	0.0004	0.3496	0.0173	54162	0.9809	Alzheimer's disease || ||	9.55873e-12	0.0036	186203	HDL cholesterol || id:ieu-a-299
rs4465830	G	A	G	A	-0.0597	0.0066	0.2018	0.0198	54162	0.7406	Alzheimer's disease || ||	5.17488e-40	0.0044	185505	HDL cholesterol || id:ieu-a-299
rs4650994	A	G	A	G	-0.021	0.004	0.4828	0.0155	54162	0.7969	Alzheimer's disease || ||	6.69607e-09	0.0034	186927	HDL cholesterol || id:ieu-a-299
rs4660293	G	A	G	A	-0.0353	0.0181	0.2361	0.0188	54162	0.3358	Alzheimer's disease || ||	2.86286e-18	0.004	187027	HDL cholesterol || id:ieu-a-299
rs4846914	A	G	A	G	0.0479	0.0077	0.5844	0.0166	54162	0.6404	Alzheimer's disease || ||	3.51318e-41	0.0034	186995	HDL cholesterol || id:ieu-a-299
rs4917014	G	T	G	T	0.0222	0.037	0.3404	0.0168	54162	0.02746	Alzheimer's disease || ||	1.02601e-08	0.0036	186868	HDL cholesterol || id:ieu-a-299
rs492571	C	T	C	T	-0.0663	-0.027	0.04222	0.0359	54162	0.4513	Alzheimer's disease || ||	1.26503e-12	0.009	177352	HDL cholesterol || id:ieu-a-299
rs4939883	C	T	C	T	0.0799	-0.0096	0.8193	0.0217	54162	0.6578	Alzheimer's disease || ||	1.79597e-66	0.0045	185576	HDL cholesterol || id:ieu-a-299
rs4969178	G	A	G	A	0.0263	0.0152	0.6266	0.0159	54162	0.3391	Alzheimer's disease || ||	1.53215e-12	0.0035	185426	HDL cholesterol || id:ieu-a-299
rs4983559	A	G	A	G	-0.0197	0.0256	0.6227	0.0173	54162	0.1394	Alzheimer's disease || ||	9.56511e-09	0.0036	183672	HDL cholesterol || id:ieu-a-299
rs499974	A	C	A	C	-0.0263	0.0108	0.1755	0.0212	54162	0.6101	Alzheimer's disease || ||	1.12001e-08	0.0044	186749	HDL cholesterol || id:ieu-a-299
rs6031587	T	C	T	C	-0.0488	0.0446	0.0686	0.0332	54162	0.1796	Alzheimer's disease || ||	1.91902e-09	0.0074	163095	HDL cholesterol || id:ieu-a-299
rs633695	G	A	G	A	0.0885	0.0094	0.285	0.0169	54162	0.5764	Alzheimer's disease || ||	7.81988e-58	0.0054	92820	HDL cholesterol || id:ieu-a-299
rs6450176	A	G	A	G	-0.0254	-0.0201	0.2784	0.0176	54162	0.2553	Alzheimer's disease || ||	6.87496e-10	0.0039	187132	HDL cholesterol || id:ieu-a-299
rs6567160	C	T	C	T	-0.0257	-0.0354	0.2309	0.0184	54162	0.0543701	Alzheimer's disease || ||	2.91803e-09	0.0041	185608	HDL cholesterol || id:ieu-a-299
rs676210	A	G	A	G	0.066	-0.0521	0.2309	0.0187	54162	0.00535994	Alzheimer's disease || ||	2.34477e-54	0.004	187081	HDL cholesterol || id:ieu-a-299
rs6805251	C	T	C	T	-0.02	0.0143	0.6187	0.0157	54162	0.3626	Alzheimer's disease || ||	1.33199e-08	0.0035	186301	HDL cholesterol || id:ieu-a-299
rs686030	A	C	A	C	0.055	0.0126	0.8588	0.022	54162	0.5673	Alzheimer's disease || ||	4.2924e-27	0.0049	187035	HDL cholesterol || id:ieu-a-299
rs687339	T	C	T	C	-0.0316	-0.0201	0.7665	0.0189	54162	0.2863	Alzheimer's disease || ||	7.10722e-13	0.0042	187105	HDL cholesterol || id:ieu-a-299
rs702485	G	A	G	A	0.0243	-0.0486	0.4499	0.0156	54162	0.00188999	Alzheimer's disease || ||	6.4506e-12	0.0034	186974	HDL cholesterol || id:ieu-a-299
rs7112577	G	C	G	C	0.0826	0.0522	NA	0.0447	54162	0.2419	Alzheimer's disease || ||	2.34002e-10	0.0129	89235	HDL cholesterol || id:ieu-a-299
rs7306660	A	G	A	G	-0.0345	-0.0101	0.3694	0.0168	54162	0.5469	Alzheimer's disease || ||	3.34118e-19	0.0036	186939	HDL cholesterol || id:ieu-a-299
rs731839	A	G	A	G	0.022	-0.0102	0.6583	0.0168	54162	0.5428	Alzheimer's disease || ||	3.44096e-09	0.0037	185498	HDL cholesterol || id:ieu-a-299
rs737337	C	T	C	T	-0.0565	0.0416	0.0686	0.0311	54162	0.1821	Alzheimer's disease || ||	4.56352e-17	0.0061	185432	HDL cholesterol || id:ieu-a-299
rs7607980	C	T	C	T	0.0447	-0.0005	0.1491	0.024	54162	0.9832	Alzheimer's disease || ||	1.80717e-15	0.0052	187036	HDL cholesterol || id:ieu-a-299
rs838876	G	A	G	A	-0.0493	-0.0028	0.6741	0.0174	54162	0.8704	Alzheimer's disease || ||	7.32487e-33	0.0039	173066	HDL cholesterol || id:ieu-a-299
rs9457931	G	A	G	A	-0.0552	0.0582	0.0686	0.0342	54162	0.08908	Alzheimer's disease || ||	7.29625e-13	0.0073	171669	HDL cholesterol || id:ieu-a-299
rs964184	C	G	C	G	0.1065	-0.0207	NA	0.0226	54162	0.3617	Alzheimer's disease || ||	6.08555e-48	0.0071	94289	HDL cholesterol || id:ieu-a-299
rs970548	C	A	C	A	0.0258	0.005	0.277	0.0178	54162	0.776699	Alzheimer's disease || ||	1.706e-10	0.0039	186596	HDL cholesterol || id:ieu-a-299
rs998584	A	C	A	C	-0.026	-0.0292	0.5145	0.0181	54162	0.1061	Alzheimer's disease || ||	2.26882e-11	0.0038	183791	HDL cholesterol || id:ieu-a-299
rs9989419	G	A	G	A	0.1473	0.0077	0.595	0.0158	54162	0.6248	Alzheimer's disease || ||	1e-200	0.0036	177532	HDL cholesterol || id:ieu-a-299
rs10073890	G	A	G	A	-0.01262	0.0022	0.7364	0.0177	54162	0.901	Alzheimer's disease || ||	1.10999e-10	0.00196	766345	Years of schooling || id:ieu-a-1239
rs1008078	T	C	T	C	-0.01738	0.0364	0.4099	0.0163	54162	0.0258399	Alzheimer's disease || ||	1.20005e-23	0.00173	766345	Years of schooling || id:ieu-a-1239
rs10189857	G	A	G	A	-0.01725	0.0428	0.4184	0.0163	54162	0.00886503	Alzheimer's disease || ||	6.70039e-24	0.00171	766345	Years of schooling || id:ieu-a-1239
rs10191758	G	A	G	A	0.01631	0.0112	0.381	0.0159	54162	0.4809	Alzheimer's disease || ||	9.60064e-21	0.00175	766345	Years of schooling || id:ieu-a-1239
rs10205801	A	G	A	G	-0.01053	0.0215	0.5068	0.0155	54162	0.165	Alzheimer's disease || ||	7.17001e-10	0.00171	766345	Years of schooling || id:ieu-a-1239
rs10215082	G	A	G	A	0.01303	0.0248	0.5612	0.0167	54162	0.1364	Alzheimer's disease || ||	3.32966e-14	0.00172	766345	Years of schooling || id:ieu-a-1239
rs10240905	C	T	C	T	0.01167	-0.0232	0.6684	0.0161	54162	0.1486	Alzheimer's disease || ||	3.78966e-11	0.00177	766345	Years of schooling || id:ieu-a-1239
rs10460095	A	G	A	G	-0.01066	0.0024	0.5867	0.017	54162	0.8867	Alzheimer's disease || ||	4.87001e-10	0.00171	766345	Years of schooling || id:ieu-a-1239
rs1051474	C	T	C	T	0.01301	-0.0142	0.2738	0.017	54162	0.4037	Alzheimer's disease || ||	4.85959e-12	0.00188	766345	Years of schooling || id:ieu-a-1239
rs10760023	G	C	G	C	0.01095	0.0193	0.3316	0.017	54162	0.2564	Alzheimer's disease || ||	2.12002e-09	0.00183	766345	Years of schooling || id:ieu-a-1239
rs10772644	C	G	C	G	0.01614	0.0048	0.8929	0.0255	54162	0.8508	Alzheimer's disease || ||	1.5e-09	0.00267	766345	Years of schooling || id:ieu-a-1239
rs10773002	T	A	T	A	-0.02191	0.0454	0.7211	0.0177	54162	0.0105201	Alzheimer's disease || ||	8.67961e-29	0.00197	766345	Years of schooling || id:ieu-a-1239
rs10797055	G	A	G	A	0.00986	-0.0152	0.5102	0.0162	54162	0.3472	Alzheimer's disease || ||	1.03999e-08	0.00172	766345	Years of schooling || id:ieu-a-1239
rs10798418	T	C	T	C	-0.00957	-0.0023	0.466	0.016	54162	0.8832	Alzheimer's disease || ||	3.29003e-08	0.00173	766345	Years of schooling || id:ieu-a-1239
rs10856785	T	C	T	C	-0.01132	-0.0204	0.7296	0.0175	54162	0.2436	Alzheimer's disease || ||	3.83001e-09	0.00192	766345	Years of schooling || id:ieu-a-1239
rs10862376	A	T	A	T	0.01616	0.0163	0.1361	0.0216	54162	0.4508	Alzheimer's disease || ||	1.39991e-11	0.00239	766345	Years of schooling || id:ieu-a-1239
rs10875121	C	G	C	G	0.01834	-0.0149	0.8571	0.0213	54162	0.4847	Alzheimer's disease || ||	5.52968e-16	0.00226	766345	Years of schooling || id:ieu-a-1239
rs10887801	T	G	T	G	0.01087	-0.0148	0.4371	0.0161	54162	0.3586	Alzheimer's disease || ||	2.27002e-10	0.00171	766345	Years of schooling || id:ieu-a-1239
rs10940921	G	T	G	T	-0.01089	-0.0143	0.5697	0.0157	54162	0.3621	Alzheimer's disease || ||	7.00003e-10	0.00177	766345	Years of schooling || id:ieu-a-1239
rs10963297	G	C	G	C	0.01904	0.0007	0.2517	0.0181	54162	0.9699	Alzheimer's disease || ||	7.36038e-22	0.00198	766345	Years of schooling || id:ieu-a-1239
rs10994777	A	G	A	G	0.0146	-0.0143	0.1395	0.0217	54162	0.5099	Alzheimer's disease || ||	3.36001e-10	0.00232	766345	Years of schooling || id:ieu-a-1239
rs11023749	A	G	A	G	0.01132	-0.0072	0.6701	0.0164	54162	0.6592	Alzheimer's disease || ||	2.95999e-10	0.0018	766345	Years of schooling || id:ieu-a-1239
rs1105307	A	G	A	G	-0.01173	-0.0025	0.2449	0.0174	54162	0.8839	Alzheimer's disease || ||	1.67001e-09	0.00195	766345	Years of schooling || id:ieu-a-1239
rs1106090	A	G	A	G	0.01173	0.0003	0.6259	0.0159	54162	0.9825	Alzheimer's disease || ||	2.08978e-11	0.00175	766345	Years of schooling || id:ieu-a-1239
rs11081529	C	T	C	T	-0.01311	0.0171	0.2568	0.0194	54162	0.3794	Alzheimer's disease || ||	1.82012e-12	0.00186	766345	Years of schooling || id:ieu-a-1239
rs11123818	A	G	A	G	0.02081	-0.0233	0.3946	0.016	54162	0.1453	Alzheimer's disease || ||	1.71989e-32	0.00175	766345	Years of schooling || id:ieu-a-1239
rs111821073	T	C	T	C	0.01385	0.0073	0.1633	0.0214	54162	0.7339	Alzheimer's disease || ||	4.84998e-09	0.00237	766345	Years of schooling || id:ieu-a-1239
rs112687095	A	G	A	G	0.01325	0.0731	0.165	0.046	54162	0.1121	Alzheimer's disease || ||	2.42003e-08	0.00238	766345	Years of schooling || id:ieu-a-1239
rs112806496	G	C	G	C	0.0187	-0.0641	0.08503	0.0301	54162	0.0333096	Alzheimer's disease || ||	8.27999e-10	0.00305	766345	Years of schooling || id:ieu-a-1239
rs113520408	A	G	A	G	0.01304	0.0148	0.2857	0.0175	54162	0.3991	Alzheimer's disease || ||	1.02e-11	0.00192	766345	Years of schooling || id:ieu-a-1239
rs113615161	T	C	T	C	-0.01472	0.0307	0.1395	0.0241	54162	0.2031	Alzheimer's disease || ||	3.97e-09	0.0025	766345	Years of schooling || id:ieu-a-1239
rs1143770	T	C	T	C	0.01136	0.0134	0.5918	0.0158	54162	0.396	Alzheimer's disease || ||	4.31023e-11	0.00172	766345	Years of schooling || id:ieu-a-1239
rs115000530	T	A	T	A	0.02892	0.0611	0.06122	0.0348	54162	0.0793908	Alzheimer's disease || ||	3.29989e-14	0.00381	766345	Years of schooling || id:ieu-a-1239
rs115454970	T	G	T	G	-0.01185	0.0046	0.3044	0.0185	54162	0.8033	Alzheimer's disease || ||	2.76001e-09	0.00199	766345	Years of schooling || id:ieu-a-1239
rs11601122	G	A	G	A	-0.01947	-0.0237	0.1497	0.0221	54162	0.2838	Alzheimer's disease || ||	2.23975e-17	0.0023	766345	Years of schooling || id:ieu-a-1239
rs11620355	A	G	A	G	0.01756	-0.0161	0.1156	0.0262	54162	0.5389	Alzheimer's disease || ||	4.77002e-09	0.003	766345	Years of schooling || id:ieu-a-1239
rs11627087	G	A	G	A	-0.01788	-0.0383	0.08503	0.0296	54162	0.1961	Alzheimer's disease || ||	3.70997e-08	0.00325	766345	Years of schooling || id:ieu-a-1239
rs11635092	A	G	A	G	-0.01231	0.0149	0.3639	0.0165	54162	0.3649	Alzheimer's disease || ||	3.88956e-12	0.00177	766345	Years of schooling || id:ieu-a-1239
rs11657342	A	G	A	G	0.01404	-0.0247	0.3554	0.0223	54162	0.2678	Alzheimer's disease || ||	1.93999e-13	0.00191	766345	Years of schooling || id:ieu-a-1239
rs11663602	A	C	A	C	-0.01213	-0.0245	0.2568	0.0192	54162	0.202	Alzheimer's disease || ||	1.63999e-10	0.0019	766345	Years of schooling || id:ieu-a-1239
rs11678980	A	G	A	G	-0.01744	-0.0196	0.4456	0.0178	54162	0.2718	Alzheimer's disease || ||	4.29042e-24	0.00172	766345	Years of schooling || id:ieu-a-1239
rs11681861	G	T	G	T	-0.01435	0.0503	0.1565	0.0231	54162	0.0294002	Alzheimer's disease || ||	2.87998e-08	0.00259	766345	Years of schooling || id:ieu-a-1239
rs11694904	T	C	T	C	0.01215	-0.0007	0.3384	0.0171	54162	0.9656	Alzheimer's disease || ||	4.77969e-11	0.00185	766345	Years of schooling || id:ieu-a-1239
rs11732657	A	G	A	G	-0.01274	-0.0396	0.7007	0.0181	54162	0.0286497	Alzheimer's disease || ||	9.53894e-11	0.00197	766345	Years of schooling || id:ieu-a-1239
rs117468730	A	G	A	G	-0.03521	0.0449	0.0119	0.0592	54162	0.4491	Alzheimer's disease || ||	3.79001e-09	0.00597	766345	Years of schooling || id:ieu-a-1239
rs11752914	C	T	C	T	-0.01208	-0.0086	0.1973	0.0199	54162	0.6663	Alzheimer's disease || ||	2.13e-08	0.00216	766345	Years of schooling || id:ieu-a-1239
rs11772580	T	G	T	G	-0.01199	-0.0061	0.2534	0.0189	54162	0.7473	Alzheimer's disease || ||	2.56998e-09	0.00201	766345	Years of schooling || id:ieu-a-1239
rs11871429	G	A	G	A	-0.01425	0.0296	0.2041	0.0185	54162	0.109	Alzheimer's disease || ||	1.91999e-12	0.00202	766345	Years of schooling || id:ieu-a-1239
rs12028010	C	T	C	T	-0.01696	0.0164	0.2228	0.0193	54162	0.3946	Alzheimer's disease || ||	4.51024e-17	0.00202	766345	Years of schooling || id:ieu-a-1239
rs12134151	C	G	C	G	-0.01245	-0.0099	0.5221	0.0157	54162	0.527	Alzheimer's disease || ||	2.41991e-13	0.0017	766345	Years of schooling || id:ieu-a-1239
rs12332731	A	T	A	T	0.01374	-0.0052	0.2024	0.0201	54162	0.797	Alzheimer's disease || ||	3.11997e-10	0.00218	766345	Years of schooling || id:ieu-a-1239
rs12375949	C	T	C	T	0.01447	-0.0113	0.5697	0.0159	54162	0.4797	Alzheimer's disease || ||	3.30979e-17	0.00172	766345	Years of schooling || id:ieu-a-1239
rs12468040	G	T	G	T	-0.01432	0.0081	0.6037	0.0162	54162	0.614601	Alzheimer's disease || ||	2.4598e-16	0.00175	766345	Years of schooling || id:ieu-a-1239
rs12503522	T	C	T	C	-0.01125	-0.0021	0.2483	0.0173	54162	0.9053	Alzheimer's disease || ||	2.24001e-09	0.00188	766345	Years of schooling || id:ieu-a-1239
rs12519073	T	C	T	C	-0.01221	0.008	0.2381	0.0186	54162	0.665001	Alzheimer's disease || ||	1.6e-09	0.00202	766345	Years of schooling || id:ieu-a-1239
rs12574281	C	A	C	A	0.01077	0.0219	0.3997	0.017	54162	0.1973	Alzheimer's disease || ||	8.84993e-10	0.00176	766345	Years of schooling || id:ieu-a-1239
rs12602286	T	G	T	G	0.01701	0.0112	0.8861	0.0249	54162	0.6526	Alzheimer's disease || ||	2.36974e-11	0.00255	766345	Years of schooling || id:ieu-a-1239
rs12643771	T	C	T	C	0.01518	0.0084	0.3112	0.0174	54162	0.6275	Alzheimer's disease || ||	1.6099e-16	0.00184	766345	Years of schooling || id:ieu-a-1239
rs12682775	C	T	C	T	0.01187	-0.0091	0.2143	0.0185	54162	0.621199	Alzheimer's disease || ||	5.99004e-09	0.00204	766345	Years of schooling || id:ieu-a-1239
rs12804787	G	A	G	A	-0.01814	-0.0163	0.06803	0.0387	54162	0.673	Alzheimer's disease || ||	2.95999e-08	0.00327	766345	Years of schooling || id:ieu-a-1239
rs1291818	C	T	C	T	-0.01085	0.0182	0.5153	0.0162	54162	0.2593	Alzheimer's disease || ||	1.78e-10	0.0017	766345	Years of schooling || id:ieu-a-1239
rs12940014	C	T	C	T	0.00936	0.0049	0.5204	0.0158	54162	0.757201	Alzheimer's disease || ||	3.73001e-08	0.0017	766345	Years of schooling || id:ieu-a-1239
rs12955211	A	T	A	T	0.01097	0.0069	0.3554	0.0167	54162	0.68	Alzheimer's disease || ||	1.59001e-09	0.00182	766345	Years of schooling || id:ieu-a-1239
rs13010566	C	A	C	A	0.0106	0.0035	0.5612	0.0155	54162	0.8221	Alzheimer's disease || ||	4.58997e-10	0.0017	766345	Years of schooling || id:ieu-a-1239
rs13029509	A	G	A	G	-0.01049	-0.0076	0.4677	0.0157	54162	0.627401	Alzheimer's disease || ||	7.17001e-10	0.0017	766345	Years of schooling || id:ieu-a-1239
rs13090388	T	C	T	C	0.02852	-0.0082	0.3095	0.0174	54162	0.639401	Alzheimer's disease || ||	4.29042e-54	0.00184	766345	Years of schooling || id:ieu-a-1239
rs13130765	C	G	C	G	-0.01014	0.0349	0.4558	0.0179	54162	0.05118	Alzheimer's disease || ||	4.68997e-09	0.00173	766345	Years of schooling || id:ieu-a-1239
rs13141210	T	C	T	C	0.01361	-0.0016	0.5085	0.0162	54162	0.92	Alzheimer's disease || ||	2.25996e-15	0.00172	766345	Years of schooling || id:ieu-a-1239
rs13145650	T	C	T	C	-0.01918	0.0115	0.90816	0.0285	54162	0.686501	Alzheimer's disease || ||	3.79997e-10	0.00306	766345	Years of schooling || id:ieu-a-1239
rs1334297	A	G	A	G	0.02449	0.0078	0.784	0.0181	54162	0.6675	Alzheimer's disease || ||	3.05985e-37	0.00192	766345	Years of schooling || id:ieu-a-1239
rs13422673	T	C	T	C	-0.01201	-0.0032	0.4847	0.0161	54162	0.8424	Alzheimer's disease || ||	1.7398e-12	0.0017	766345	Years of schooling || id:ieu-a-1239
rs1363862	A	G	A	G	-0.01171	0.0192	0.2602	0.0175	54162	0.2746	Alzheimer's disease || ||	1.02e-09	0.00192	766345	Years of schooling || id:ieu-a-1239
rs1381247	C	T	C	T	-0.01013	-0.0248	0.2908	0.0186	54162	0.1821	Alzheimer's disease || ||	2.45997e-08	0.00182	766345	Years of schooling || id:ieu-a-1239
rs1391438	C	T	C	T	-0.0167	-0.0025	0.6854	0.0169	54162	0.884	Alzheimer's disease || ||	5.79029e-20	0.00183	766345	Years of schooling || id:ieu-a-1239
rs1427298	T	C	T	C	0.0102	0	0.4116	0.016	54162	0.9991	Alzheimer's disease || ||	3.27997e-09	0.00172	766345	Years of schooling || id:ieu-a-1239
rs1450782	G	T	G	T	-0.00945	-0.0146	0.602	0.0162	54162	0.3676	Alzheimer's disease || ||	4.93003e-08	0.00173	766345	Years of schooling || id:ieu-a-1239
rs1455350	A	T	A	T	-0.01614	-0.0019	0.4711	0.0155	54162	0.902	Alzheimer's disease || ||	2.60976e-21	0.0017	766345	Years of schooling || id:ieu-a-1239
rs152603	G	A	G	A	0.01019	0.0013	0.3861	0.0166	54162	0.9385	Alzheimer's disease || ||	9.47e-09	0.00177	766345	Years of schooling || id:ieu-a-1239
rs1558727	T	C	T	C	-0.01069	0.0074	0.4847	0.0155	54162	0.6316	Alzheimer's disease || ||	3.09001e-10	0.0017	766345	Years of schooling || id:ieu-a-1239
rs1566085	T	G	T	G	0.01645	0.0308	0.5697	0.0159	54162	0.05292	Alzheimer's disease || ||	6.90081e-22	0.00171	766345	Years of schooling || id:ieu-a-1239
rs1569092	A	G	A	G	0.01807	-0.0495	0.182	0.0225	54162	0.02784	Alzheimer's disease || ||	1.16011e-14	0.00234	766345	Years of schooling || id:ieu-a-1239
rs1584469	T	C	T	C	-0.01303	-0.0001	0.3112	0.0171	54162	0.9973	Alzheimer's disease || ||	2.09991e-12	0.00185	766345	Years of schooling || id:ieu-a-1239
rs1592757	C	G	C	G	-0.01045	0.0055	0.3759	0.0167	54162	0.743401	Alzheimer's disease || ||	5.88993e-09	0.0018	766345	Years of schooling || id:ieu-a-1239
rs1595973	T	C	T	C	-0.01002	-0.0223	0.5595	0.0156	54162	0.1531	Alzheimer's disease || ||	6.55994e-09	0.00173	766345	Years of schooling || id:ieu-a-1239
rs1618725	T	C	T	C	0.01477	0.0109	0.5204	0.0156	54162	0.4844	Alzheimer's disease || ||	2.22024e-17	0.00174	766345	Years of schooling || id:ieu-a-1239
rs1620977	G	A	G	A	-0.02046	0.0335	0.6905	0.0175	54162	0.0559603	Alzheimer's disease || ||	1.13999e-25	0.00195	766345	Years of schooling || id:ieu-a-1239
rs1671770	C	A	C	A	-0.01342	0.0348	0.8061	0.0198	54162	0.0790005	Alzheimer's disease || ||	1.90999e-09	0.00223	766345	Years of schooling || id:ieu-a-1239
rs16846463	G	A	G	A	-0.02256	-0.0093	0.1173	0.0266	54162	0.7258	Alzheimer's disease || ||	1.38007e-15	0.00283	766345	Years of schooling || id:ieu-a-1239
rs16854920	C	T	C	T	0.01007	-0.0027	0.3554	0.0179	54162	0.879	Alzheimer's disease || ||	2.50998e-08	0.00181	766345	Years of schooling || id:ieu-a-1239
rs1689510	C	G	C	G	0.01761	-0.016	0.3435	0.0165	54162	0.3316	Alzheimer's disease || ||	1.39991e-22	0.0018	766345	Years of schooling || id:ieu-a-1239
rs16995054	T	C	T	C	-0.0139	0.0077	0.2007	0.0192	54162	0.6879	Alzheimer's disease || ||	2.52e-11	0.00208	766345	Years of schooling || id:ieu-a-1239
rs17048855	A	G	A	G	0.01184	-0.0168	0.3248	0.0165	54162	0.3097	Alzheimer's disease || ||	3.26964e-11	0.00179	766345	Years of schooling || id:ieu-a-1239
rs17110109	C	T	C	T	0.01023	-0.0426	0.3776	0.0168	54162	0.0112199	Alzheimer's disease || ||	4.70999e-09	0.00175	766345	Years of schooling || id:ieu-a-1239
rs17126938	C	T	C	T	0.01536	-0.0219	0.1207	0.0224	54162	0.3292	Alzheimer's disease || ||	8.13992e-10	0.0025	766345	Years of schooling || id:ieu-a-1239
rs17425572	G	A	G	A	-0.01224	0.0039	0.5425	0.0156	54162	0.8027	Alzheimer's disease || ||	6.8897e-13	0.0017	766345	Years of schooling || id:ieu-a-1239
rs17489649	G	A	G	A	-0.0139	0.0213	0.3265	0.0163	54162	0.1911	Alzheimer's disease || ||	1.57e-14	0.00181	766345	Years of schooling || id:ieu-a-1239
rs175325	A	T	A	T	-0.01179	-0.0473	0.5816	0.016	54162	0.00309799	Alzheimer's disease || ||	1.10994e-11	0.00174	766345	Years of schooling || id:ieu-a-1239
rs17551064	G	A	G	A	-0.01493	0.0421	0.1599	0.022	54162	0.0558097	Alzheimer's disease || ||	8.61986e-11	0.0023	766345	Years of schooling || id:ieu-a-1239
rs17563464	A	C	A	C	-0.01477	0.0079	0.2041	0.0227	54162	0.729001	Alzheimer's disease || ||	2.89001e-12	0.00212	766345	Years of schooling || id:ieu-a-1239
rs17565975	A	G	A	G	-0.01142	-0.0208	0.5306	0.0157	54162	0.184	Alzheimer's disease || ||	2.55976e-11	0.00171	766345	Years of schooling || id:ieu-a-1239
rs17598675	C	T	C	T	0.01199	0.0092	0.5187	0.0156	54162	0.5561	Alzheimer's disease || ||	1.74985e-12	0.0017	766345	Years of schooling || id:ieu-a-1239
rs176218	T	G	T	G	0.01883	-0.027	0.2007	0.0202	54162	0.1828	Alzheimer's disease || ||	1.85012e-18	0.00215	766345	Years of schooling || id:ieu-a-1239
rs1827540	G	A	G	A	-0.0106	-0.0216	0.466	0.0153	54162	0.1585	Alzheimer's disease || ||	4.49997e-10	0.0017	766345	Years of schooling || id:ieu-a-1239
rs1866823	A	G	A	G	0.01009	-0.0169	0.551	0.0156	54162	0.2791	Alzheimer's disease || ||	3.80996e-09	0.00171	766345	Years of schooling || id:ieu-a-1239
rs1882273	C	G	C	G	-0.01231	0.0377	0.3469	0.0183	54162	0.03971	Alzheimer's disease || ||	1.08993e-11	0.00181	766345	Years of schooling || id:ieu-a-1239
rs1925576	G	A	G	A	0.00997	-0.0347	0.4422	0.0155	54162	0.0249799	Alzheimer's disease || ||	4.94003e-09	0.00171	766345	Years of schooling || id:ieu-a-1239
rs1947114	G	A	G	A	0.01071	0.0031	0.2551	0.0183	54162	0.8644	Alzheimer's disease || ||	2.63998e-08	0.00192	766345	Years of schooling || id:ieu-a-1239
rs1949226	A	T	A	T	-0.00965	0.0023	0.5901	0.0159	54162	0.8872	Alzheimer's disease || ||	2.84001e-08	0.00174	766345	Years of schooling || id:ieu-a-1239
rs2052285	A	G	A	G	0.01123	-0.0298	0.5765	0.0174	54162	0.0866303	Alzheimer's disease || ||	1.33999e-10	0.00175	766345	Years of schooling || id:ieu-a-1239
rs2067854	A	G	A	G	0.01477	0.0271	0.182	0.0204	54162	0.1847	Alzheimer's disease || ||	1.38007e-12	0.00209	766345	Years of schooling || id:ieu-a-1239
rs2179152	C	T	C	T	0.01455	-0.0213	0.6429	0.0167	54162	0.2035	Alzheimer's disease || ||	1.21004e-16	0.00176	766345	Years of schooling || id:ieu-a-1239
rs2182505	C	T	C	T	-0.01086	0.0123	0.7364	0.0177	54162	0.4871	Alzheimer's disease || ||	1.63999e-08	0.00192	766345	Years of schooling || id:ieu-a-1239
rs225291	G	A	G	A	-0.01205	0.014	0.8027	0.0191	54162	0.4623	Alzheimer's disease || ||	1.84001e-08	0.00214	766345	Years of schooling || id:ieu-a-1239
rs2283076	G	A	G	A	-0.01143	0.0142	0.2143	0.0188	54162	0.4507	Alzheimer's disease || ||	2.07e-08	0.00204	766345	Years of schooling || id:ieu-a-1239
rs2287838	A	G	A	G	-0.01152	0.0087	0.534	0.0162	54162	0.5895	Alzheimer's disease || ||	1.53003e-11	0.00171	766345	Years of schooling || id:ieu-a-1239
rs2302761	T	C	T	C	0.01354	-0.0136	0.1905	0.0196	54162	0.4885	Alzheimer's disease || ||	1e-10	0.00209	766345	Years of schooling || id:ieu-a-1239
rs2347526	C	T	C	T	0.01395	-0.0097	0.6378	0.0162	54162	0.5478	Alzheimer's disease || ||	6.84069e-15	0.00179	766345	Years of schooling || id:ieu-a-1239
rs2414072	A	T	A	T	-0.01005	-0.034	0.4864	0.0156	54162	0.0290998	Alzheimer's disease || ||	4.35001e-09	0.00171	766345	Years of schooling || id:ieu-a-1239
rs242093	A	G	A	G	-0.01031	-0.0006	0.5476	0.0154	54162	0.9697	Alzheimer's disease || ||	2.07e-09	0.00172	766345	Years of schooling || id:ieu-a-1239
rs2441111	A	G	A	G	0.01087	-0.0133	0.5323	0.0157	54162	0.3975	Alzheimer's disease || ||	1.78e-10	0.0017	766345	Years of schooling || id:ieu-a-1239
rs2447535	G	A	G	A	0.01181	0.0012	0.7245	0.0171	54162	0.9456	Alzheimer's disease || ||	1.69001e-10	0.00185	766345	Years of schooling || id:ieu-a-1239
rs2478208	C	G	C	G	-0.0106	-0.0317	0.5	0.0159	54162	0.0460405	Alzheimer's disease || ||	4.82003e-10	0.0017	766345	Years of schooling || id:ieu-a-1239
rs2545798	A	T	A	T	-0.01346	-0.0101	0.4949	0.0164	54162	0.5361	Alzheimer's disease || ||	3.11028e-15	0.00171	766345	Years of schooling || id:ieu-a-1239
rs2554835	A	G	A	G	0.00974	-0.0121	0.398	0.0187	54162	0.5166	Alzheimer's disease || ||	2.68999e-08	0.00175	766345	Years of schooling || id:ieu-a-1239
rs2570497	T	C	T	C	-0.01233	-0.0065	0.6735	0.0167	54162	0.6943	Alzheimer's disease || ||	3.0297e-12	0.00177	766345	Years of schooling || id:ieu-a-1239
rs2725370	C	T	C	T	0.01536	-0.0235	0.7109	0.017	54162	0.166	Alzheimer's disease || ||	1.97015e-16	0.00187	766345	Years of schooling || id:ieu-a-1239
rs277828	A	C	A	C	-0.01091	0.0295	0.2568	0.0179	54162	0.0994901	Alzheimer's disease || ||	2.71e-08	0.00196	766345	Years of schooling || id:ieu-a-1239
rs2787101	T	C	T	C	0.00968	-0.0464	0.6173	0.0165	54162	0.004917	Alzheimer's disease || ||	2.5e-08	0.00174	766345	Years of schooling || id:ieu-a-1239
rs2819336	C	T	C	T	-0.01828	-0.0016	0.6616	0.0165	54162	0.9246	Alzheimer's disease || ||	5.46009e-25	0.00177	766345	Years of schooling || id:ieu-a-1239
rs2820314	C	A	C	A	-0.011	0.0109	0.3163	0.0165	54162	0.508	Alzheimer's disease || ||	9.34007e-10	0.0018	766345	Years of schooling || id:ieu-a-1239
rs28373063	C	G	C	G	0.01389	-0.0057	0.2075	0.0226	54162	0.8	Alzheimer's disease || ||	1.22999e-09	0.00229	766345	Years of schooling || id:ieu-a-1239
rs2885198	G	A	G	A	-0.01025	-0.0045	0.5017	0.0164	54162	0.783201	Alzheimer's disease || ||	1.81001e-09	0.0017	766345	Years of schooling || id:ieu-a-1239
rs2905426	T	G	T	G	0.01037	-0.0231	0.6446	0.0175	54162	0.1867	Alzheimer's disease || ||	9.25998e-09	0.00181	766345	Years of schooling || id:ieu-a-1239
rs2923431	C	G	C	G	0.0114	0.0426	0.6446	0.0168	54162	0.0109901	Alzheimer's disease || ||	9.84011e-11	0.00176	766345	Years of schooling || id:ieu-a-1239
rs2971970	G	T	G	T	0.01654	-0.021	0.7721	0.0191	54162	0.2719	Alzheimer's disease || ||	1.24997e-15	0.00207	766345	Years of schooling || id:ieu-a-1239
rs2998315	G	A	G	A	0.01269	-0.0095	0.5782	0.0162	54162	0.5575	Alzheimer's disease || ||	1.11995e-13	0.00171	766345	Years of schooling || id:ieu-a-1239
rs3013014	A	G	A	G	-0.01024	0.012	0.6105	0.0165	54162	0.4667	Alzheimer's disease || ||	2.91998e-09	0.00172	766345	Years of schooling || id:ieu-a-1239
rs301800	C	T	C	T	-0.01516	0.0052	0.8197	0.0195	54162	0.7891	Alzheimer's disease || ||	1.33015e-11	0.00224	766345	Years of schooling || id:ieu-a-1239
rs3026996	C	A	C	A	-0.01537	-0.0004	0.284	0.0191	54162	0.9819	Alzheimer's disease || ||	1.05003e-14	0.00199	766345	Years of schooling || id:ieu-a-1239
rs320693	C	G	C	G	0.01204	-0.0064	0.4728	0.0154	54162	0.6761	Alzheimer's disease || ||	1.58016e-12	0.0017	766345	Years of schooling || id:ieu-a-1239
rs337637	A	G	A	G	0.01123	0.0077	0.3367	0.0162	54162	0.6334	Alzheimer's disease || ||	2.10999e-10	0.00177	766345	Years of schooling || id:ieu-a-1239
rs34316	C	A	C	A	-0.02016	0.0344	0.5799	0.0156	54162	0.0276701	Alzheimer's disease || ||	3.34965e-30	0.00177	766345	Years of schooling || id:ieu-a-1239
rs34394051	G	A	G	A	0.01392	0.0279	0.1599	0.0216	54162	0.1969	Alzheimer's disease || ||	6.19998e-09	0.0024	766345	Years of schooling || id:ieu-a-1239
rs34485537	T	C	T	C	0.01075	0.0075	0.3895	0.0173	54162	0.662599	Alzheimer's disease || ||	5.66996e-10	0.00173	766345	Years of schooling || id:ieu-a-1239
rs34853711	C	G	C	G	-0.01596	-0.0089	0.2466	0.0188	54162	0.6364	Alzheimer's disease || ||	9.88098e-15	0.00206	766345	Years of schooling || id:ieu-a-1239
rs35039375	G	A	G	A	-0.01983	0.0222	0.09354	0.0346	54162	0.5208	Alzheimer's disease || ||	1.22011e-11	0.00293	766345	Years of schooling || id:ieu-a-1239
rs35309068	G	T	G	T	0.01321	-0.018	0.466	0.0157	54162	0.2525	Alzheimer's disease || ||	1.15001e-14	0.00171	766345	Years of schooling || id:ieu-a-1239
rs35316276	T	C	T	C	0.01173	-0.024	0.2942	0.0196	54162	0.2198	Alzheimer's disease || ||	1.51999e-09	0.00194	766345	Years of schooling || id:ieu-a-1239
rs35417702	T	C	T	C	-0.01445	0.0155	0.5765	0.0154	54162	0.3143	Alzheimer's disease || ||	1.93019e-17	0.0017	766345	Years of schooling || id:ieu-a-1239
rs35475880	T	G	T	G	-0.01511	0.0269	0.1837	0.0199	54162	0.1756	Alzheimer's disease || ||	3.80014e-13	0.00208	766345	Years of schooling || id:ieu-a-1239
rs35532491	T	A	T	A	0.02007	0.0146	0.1071	0.0258	54162	0.5721	Alzheimer's disease || ||	2.41991e-12	0.00286	766345	Years of schooling || id:ieu-a-1239
rs36083520	C	T	C	T	0.01629	0.0126	0.1667	0.0217	54162	0.5611	Alzheimer's disease || ||	2.60016e-13	0.00223	766345	Years of schooling || id:ieu-a-1239
rs36119825	A	G	A	G	0.01063	-0.0173	0.4694	0.0156	54162	0.2683	Alzheimer's disease || ||	4.82003e-10	0.00171	766345	Years of schooling || id:ieu-a-1239
rs363096	C	T	C	T	0.01363	-0.002	0.5748	0.0161	54162	0.9	Alzheimer's disease || ||	2.03986e-15	0.00172	766345	Years of schooling || id:ieu-a-1239
rs3747631	C	G	C	G	0.02207	0.0142	0.2279	0.0187	54162	0.4471	Alzheimer's disease || ||	2.9703e-26	0.00208	766345	Years of schooling || id:ieu-a-1239
rs3788556	C	T	C	T	-0.01138	0.0068	0.5408	0.0168	54162	0.6853	Alzheimer's disease || ||	2.77971e-11	0.00171	766345	Years of schooling || id:ieu-a-1239
rs3800546	G	C	G	C	-0.01183	-0.0092	0.2704	0.0186	54162	0.619599	Alzheimer's disease || ||	9.72994e-10	0.00194	766345	Years of schooling || id:ieu-a-1239
rs3809634	G	A	G	A	0.01058	0	0.335	0.0169	54162	0.9977	Alzheimer's disease || ||	1.09001e-08	0.00185	766345	Years of schooling || id:ieu-a-1239
rs3890802	A	G	A	G	-0.01133	0.0153	0.2687	0.0174	54162	0.3779	Alzheimer's disease || ||	2.74e-09	0.00191	766345	Years of schooling || id:ieu-a-1239
rs3897821	G	A	G	A	-0.01502	0.0308	0.3503	0.0163	54162	0.0596705	Alzheimer's disease || ||	8.25087e-17	0.0018	766345	Years of schooling || id:ieu-a-1239
rs401687	C	G	C	G	0.01144	0.0112	0.4558	0.0156	54162	0.4738	Alzheimer's disease || ||	1.85994e-11	0.0017	766345	Years of schooling || id:ieu-a-1239
rs406413	T	A	T	A	-0.01695	-0.0082	0.2109	0.0189	54162	0.6652	Alzheimer's disease || ||	4.83949e-16	0.00209	766345	Years of schooling || id:ieu-a-1239
rs4073894	A	G	A	G	0.01524	-0.0284	0.1769	0.0195	54162	0.1453	Alzheimer's disease || ||	5.40008e-13	0.00211	766345	Years of schooling || id:ieu-a-1239
rs4328757	T	C	T	C	0.01067	0.0036	0.6514	0.0176	54162	0.8382	Alzheimer's disease || ||	9.3901e-10	0.00174	766345	Years of schooling || id:ieu-a-1239
rs4352658	T	C	T	C	-0.0212	-0.0298	0.09014	0.0307	54162	0.3313	Alzheimer's disease || ||	5.55009e-12	0.00308	766345	Years of schooling || id:ieu-a-1239
rs4369924	A	G	A	G	0.01362	0.0043	0.1684	0.0224	54162	0.8487	Alzheimer's disease || ||	5.81996e-09	0.00234	766345	Years of schooling || id:ieu-a-1239
rs4382592	G	T	G	T	0.01636	0.0039	0.699	0.0165	54162	0.811	Alzheimer's disease || ||	1.00995e-18	0.00185	766345	Years of schooling || id:ieu-a-1239
rs4384309	A	G	A	G	0.0109	-0.0088	0.4796	0.0166	54162	0.5944	Alzheimer's disease || ||	2.52e-10	0.00172	766345	Years of schooling || id:ieu-a-1239
rs4392737	G	A	G	A	-0.0097	-0.0191	0.3827	0.016	54162	0.2316	Alzheimer's disease || ||	2.24001e-08	0.00173	766345	Years of schooling || id:ieu-a-1239
rs4442732	G	A	G	A	-0.01063	0.0114	0.5969	0.0164	54162	0.4885	Alzheimer's disease || ||	1.49001e-09	0.00176	766345	Years of schooling || id:ieu-a-1239
rs4497562	G	A	G	A	-0.01204	0.0283	0.2823	0.0172	54162	0.1009	Alzheimer's disease || ||	3.73001e-10	0.00192	766345	Years of schooling || id:ieu-a-1239
rs4667025	A	G	A	G	0.00957	0.0053	0.3878	0.0156	54162	0.7365	Alzheimer's disease || ||	3.84999e-08	0.00174	766345	Years of schooling || id:ieu-a-1239
rs4700393	G	A	G	A	0.02086	-0.0306	0.5289	0.0154	54162	0.0476299	Alzheimer's disease || ||	1.51008e-34	0.0017	766345	Years of schooling || id:ieu-a-1239
rs4726070	A	G	A	G	0.01251	-0.0062	0.6207	0.0158	54162	0.6953	Alzheimer's disease || ||	5.94977e-13	0.00174	766345	Years of schooling || id:ieu-a-1239
rs4733264	C	G	C	G	-0.00954	-0.0174	0.631	0.0161	54162	0.282	Alzheimer's disease || ||	4.53002e-08	0.00174	766345	Years of schooling || id:ieu-a-1239
rs4743923	C	T	C	T	0.00985	-0.0344	0.3673	0.0166	54162	0.0382499	Alzheimer's disease || ||	2.42003e-08	0.00176	766345	Years of schooling || id:ieu-a-1239
rs4757957	C	G	C	G	0.0141	-0.03	0.6514	0.0168	54162	0.0738907	Alzheimer's disease || ||	1.81009e-14	0.00184	766345	Years of schooling || id:ieu-a-1239
rs4766424	G	C	G	C	-0.0141	0.0155	0.91156	0.0242	54162	0.5218	Alzheimer's disease || ||	4.42996e-08	0.00258	766345	Years of schooling || id:ieu-a-1239
rs4778058	C	T	C	T	0.01017	-0.0045	0.5221	0.0165	54162	0.785899	Alzheimer's disease || ||	2.39999e-09	0.0017	766345	Years of schooling || id:ieu-a-1239
rs4787457	G	A	G	A	-0.01741	0.0065	0.3146	0.0162	54162	0.6867	Alzheimer's disease || ||	3.72992e-23	0.00176	766345	Years of schooling || id:ieu-a-1239
rs4810227	A	G	A	G	0.01272	0.0174	0.6344	0.0166	54162	0.2958	Alzheimer's disease || ||	3.57026e-13	0.00175	766345	Years of schooling || id:ieu-a-1239
rs4839155	G	T	G	T	-0.01251	-0.0089	0.25	0.0185	54162	0.6293	Alzheimer's disease || ||	3.94003e-10	0.002	766345	Years of schooling || id:ieu-a-1239
rs4846724	A	G	A	G	0.01018	0.0057	0.4915	0.0161	54162	0.723801	Alzheimer's disease || ||	2.26001e-09	0.0017	766345	Years of schooling || id:ieu-a-1239
rs4870482	G	C	G	C	-0.01083	-0.0088	0.2585	0.0185	54162	0.6344	Alzheimer's disease || ||	1.26999e-08	0.0019	766345	Years of schooling || id:ieu-a-1239
rs4888746	G	A	G	A	-0.00952	0.0141	0.3776	0.0161	54162	0.3811	Alzheimer's disease || ||	4.15002e-08	0.00174	766345	Years of schooling || id:ieu-a-1239
rs4904523	A	G	A	G	-0.00936	0.0072	0.4592	0.0153	54162	0.639	Alzheimer's disease || ||	3.70997e-08	0.0017	766345	Years of schooling || id:ieu-a-1239
rs4945424	A	C	A	C	-0.00992	-0.0146	0.415	0.016	54162	0.3607	Alzheimer's disease || ||	6.94001e-09	0.00171	766345	Years of schooling || id:ieu-a-1239
rs4964046	G	A	G	A	0.01053	0.0169	0.335	0.016	54162	0.2897	Alzheimer's disease || ||	3.36001e-09	0.00178	766345	Years of schooling || id:ieu-a-1239
rs4972400	A	G	A	G	0.01156	-0.021	0.352	0.02	54162	0.2953	Alzheimer's disease || ||	1.7e-10	0.00181	766345	Years of schooling || id:ieu-a-1239
rs4984541	G	A	G	A	0.01233	-0.0081	0.2415	0.0209	54162	0.6984	Alzheimer's disease || ||	2.77e-09	0.00207	766345	Years of schooling || id:ieu-a-1239
rs510706	C	G	C	G	0.01071	0.0394	0.6156	0.016	54162	0.0137499	Alzheimer's disease || ||	2.72998e-09	0.0018	766345	Years of schooling || id:ieu-a-1239
rs535307	G	A	G	A	-0.01004	-0.0305	0.6769	0.0171	54162	0.0736292	Alzheimer's disease || ||	4.72999e-08	0.00184	766345	Years of schooling || id:ieu-a-1239
rs55736314	G	C	G	C	0.01431	-0.0046	0.4167	0.016	54162	0.772499	Alzheimer's disease || ||	1.63005e-16	0.00174	766345	Years of schooling || id:ieu-a-1239
rs55771711	C	G	C	G	0.01555	-0.0121	0.2279	0.0201	54162	0.5472	Alzheimer's disease || ||	5.41003e-15	0.00199	766345	Years of schooling || id:ieu-a-1239
rs56391344	A	G	A	G	0.01571	-0.0058	0.2381	0.0185	54162	0.755899	Alzheimer's disease || ||	1.33999e-15	0.00197	766345	Years of schooling || id:ieu-a-1239
rs575113	A	G	A	G	0.01285	-0.0058	0.2772	0.0175	54162	0.7387	Alzheimer's disease || ||	5.30029e-12	0.00186	766345	Years of schooling || id:ieu-a-1239
rs59123361	A	G	A	G	-0.02094	0.0581	0.1054	0.031	54162	0.0610506	Alzheimer's disease || ||	5.86949e-13	0.00291	766345	Years of schooling || id:ieu-a-1239
rs59480703	C	G	C	G	-0.01237	-0.0211	0.1633	0.0209	54162	0.3126	Alzheimer's disease || ||	8.31994e-09	0.00215	766345	Years of schooling || id:ieu-a-1239
rs60483752	C	G	C	G	0.01078	-0.0314	0.5816	0.0162	54162	0.0528105	Alzheimer's disease || ||	3.89e-10	0.00172	766345	Years of schooling || id:ieu-a-1239
rs6122735	T	C	T	C	0.0105	0.0114	0.4133	0.0158	54162	0.4725	Alzheimer's disease || ||	1.49001e-09	0.00174	766345	Years of schooling || id:ieu-a-1239
rs6123924	G	A	G	A	-0.01528	0.0143	0.1599	0.0223	54162	0.52	Alzheimer's disease || ||	7.54918e-11	0.00235	766345	Years of schooling || id:ieu-a-1239
rs613872	T	G	T	G	-0.0175	0.0121	0.8282	0.021	54162	0.5623	Alzheimer's disease || ||	1.20005e-14	0.00227	766345	Years of schooling || id:ieu-a-1239
rs61747885	T	G	T	G	0.01383	0.0307	0.1412	0.022	54162	0.1622	Alzheimer's disease || ||	4.13e-09	0.00235	766345	Years of schooling || id:ieu-a-1239
rs62097985	T	C	T	C	-0.01288	-0.0211	0.4116	0.0159	54162	0.1845	Alzheimer's disease || ||	6.06038e-14	0.00172	766345	Years of schooling || id:ieu-a-1239
rs62157915	C	T	C	T	0.02091	0.0155	0.05952	0.0325	54162	0.6336	Alzheimer's disease || ||	1.96002e-09	0.00348	766345	Years of schooling || id:ieu-a-1239
rs62183776	T	C	T	C	-0.01308	0.0096	0.1905	0.0211	54162	0.648	Alzheimer's disease || ||	1.64999e-09	0.00217	766345	Years of schooling || id:ieu-a-1239
rs62184480	T	C	T	C	-0.01528	0.0263	0.2449	0.0178	54162	0.1395	Alzheimer's disease || ||	1.27997e-15	0.00191	766345	Years of schooling || id:ieu-a-1239
rs622169	T	C	T	C	0.00999	-0.0123	0.4677	0.0182	54162	0.4984	Alzheimer's disease || ||	1.88999e-08	0.00178	766345	Years of schooling || id:ieu-a-1239
rs62439690	A	G	A	G	-0.01087	0.0212	0.267	0.0178	54162	0.235	Alzheimer's disease || ||	2.18002e-08	0.00194	766345	Years of schooling || id:ieu-a-1239
rs62444881	T	C	T	C	0.01815	0.0283	0.1905	0.0195	54162	0.1459	Alzheimer's disease || ||	5.79029e-17	0.00217	766345	Years of schooling || id:ieu-a-1239
rs6493265	T	C	T	C	-0.01385	0.0208	0.3895	0.0162	54162	0.1982	Alzheimer's disease || ||	1.69981e-15	0.00174	766345	Years of schooling || id:ieu-a-1239
rs6513959	G	A	G	A	-0.01177	-0.0291	0.2789	0.0169	54162	0.0845999	Alzheimer's disease || ||	1.88001e-10	0.00185	766345	Years of schooling || id:ieu-a-1239
rs6557171	C	T	C	T	0.01567	-0.0355	0.7245	0.0171	54162	0.0382701	Alzheimer's disease || ||	4.14954e-18	0.00181	766345	Years of schooling || id:ieu-a-1239
rs663234	G	C	G	C	-0.01005	0.0319	0.6122	0.0161	54162	0.0477705	Alzheimer's disease || ||	7.38992e-09	0.00174	766345	Years of schooling || id:ieu-a-1239
rs66568921	G	T	G	T	0.01565	0.0068	0.3639	0.0164	54162	0.676901	Alzheimer's disease || ||	7.49031e-18	0.00182	766345	Years of schooling || id:ieu-a-1239
rs6731373	A	G	A	G	-0.01256	0.008	0.3367	0.0179	54162	0.655101	Alzheimer's disease || ||	3.46976e-12	0.00181	766345	Years of schooling || id:ieu-a-1239
rs6731967	C	G	C	G	-0.01186	0.0359	0.2092	0.0188	54162	0.0562795	Alzheimer's disease || ||	2.35999e-09	0.00199	766345	Years of schooling || id:ieu-a-1239
rs67885444	T	C	T	C	0.01406	0.0654	0.1718	0.0214	54162	0.00226298	Alzheimer's disease || ||	1.47999e-09	0.00232	766345	Years of schooling || id:ieu-a-1239
rs67890737	A	C	A	C	-0.01141	-0.0101	0.3265	0.016	54162	0.5301	Alzheimer's disease || ||	2.01002e-10	0.00179	766345	Years of schooling || id:ieu-a-1239
rs6803651	T	G	T	G	0.01131	-0.0222	0.415	0.0169	54162	0.1886	Alzheimer's disease || ||	4.36014e-11	0.00172	766345	Years of schooling || id:ieu-a-1239
rs6805241	C	T	C	T	-0.01413	0.0234	0.1973	0.0193	54162	0.2236	Alzheimer's disease || ||	3.0903e-12	0.00203	766345	Years of schooling || id:ieu-a-1239
rs6867851	C	G	C	G	-0.012	0.0019	0.4235	0.0163	54162	0.9081	Alzheimer's disease || ||	3.97009e-12	0.00173	766345	Years of schooling || id:ieu-a-1239
rs6938002	A	G	A	G	-0.01008	0.0194	0.3963	0.0163	54162	0.2332	Alzheimer's disease || ||	5.41003e-09	0.00173	766345	Years of schooling || id:ieu-a-1239
rs6959891	G	A	G	A	-0.01136	0.0148	0.2959	0.0177	54162	0.4039	Alzheimer's disease || ||	1.74e-09	0.00189	766345	Years of schooling || id:ieu-a-1239
rs7012546	T	C	T	C	0.01009	-0.0034	0.4201	0.0163	54162	0.8326	Alzheimer's disease || ||	4.93003e-09	0.00172	766345	Years of schooling || id:ieu-a-1239
rs7016302	G	C	G	C	0.01243	-0.0389	0.1769	0.0209	54162	0.0621098	Alzheimer's disease || ||	4.98001e-08	0.00228	766345	Years of schooling || id:ieu-a-1239
rs702606	C	T	C	T	-0.01427	-0.006	0.1701	0.0228	54162	0.7927	Alzheimer's disease || ||	1.12001e-08	0.0025	766345	Years of schooling || id:ieu-a-1239
rs7029718	A	G	A	G	0.02439	-0.0239	0.4354	0.0172	54162	0.1661	Alzheimer's disease || ||	1.85012e-44	0.00174	766345	Years of schooling || id:ieu-a-1239
rs7031698	C	T	C	T	0.01248	0.0046	0.7755	0.0203	54162	0.8195	Alzheimer's disease || ||	1.26e-09	0.00206	766345	Years of schooling || id:ieu-a-1239
rs710629	A	G	A	G	0.01053	0.0018	0.6565	0.0162	54162	0.9095	Alzheimer's disease || ||	2.95999e-09	0.00177	766345	Years of schooling || id:ieu-a-1239
rs71646142	T	C	T	C	0.01286	0.006	0.1735	0.0198	54162	0.763199	Alzheimer's disease || ||	3.11e-09	0.00217	766345	Years of schooling || id:ieu-a-1239
rs7233920	A	G	A	G	-0.01315	0.0172	0.216	0.0184	54162	0.3474	Alzheimer's disease || ||	7.13017e-11	0.00202	766345	Years of schooling || id:ieu-a-1239
rs7257460	C	T	C	T	-0.01145	-0.0156	0.2704	0.0176	54162	0.376	Alzheimer's disease || ||	1.25e-09	0.00189	766345	Years of schooling || id:ieu-a-1239
rs7278859	T	A	T	A	0.01013	-0.0133	0.3078	0.0166	54162	0.4222	Alzheimer's disease || ||	4.15002e-08	0.00185	766345	Years of schooling || id:ieu-a-1239
rs72807818	A	G	A	G	0.01915	-0.0082	0.1241	0.0225	54162	0.7146	Alzheimer's disease || ||	2.78997e-14	0.00252	766345	Years of schooling || id:ieu-a-1239
rs72828517	C	T	C	T	0.01836	-0.0055	0.1412	0.0204	54162	0.7872	Alzheimer's disease || ||	2.83009e-16	0.00224	766345	Years of schooling || id:ieu-a-1239
rs72840994	G	T	G	T	0.01247	0.0155	0.182	0.0201	54162	0.4403	Alzheimer's disease || ||	7.76998e-09	0.00216	766345	Years of schooling || id:ieu-a-1239
rs730384	A	G	A	G	0.01016	-0.0034	0.4558	0.0154	54162	0.8278	Alzheimer's disease || ||	3.01002e-09	0.00171	766345	Years of schooling || id:ieu-a-1239
rs7315713	T	A	T	A	-0.01022	0.019	0.6633	0.0169	54162	0.2612	Alzheimer's disease || ||	4.34e-08	0.00187	766345	Years of schooling || id:ieu-a-1239
rs7321274	G	A	G	A	-0.01275	0.002	0.1956	0.0191	54162	0.9186	Alzheimer's disease || ||	1.59001e-09	0.00211	766345	Years of schooling || id:ieu-a-1239
rs73301698	A	G	A	G	-0.01291	0.0063	0.2262	0.0189	54162	0.7388	Alzheimer's disease || ||	5.81005e-10	0.00208	766345	Years of schooling || id:ieu-a-1239
rs7332724	T	C	T	C	-0.01149	0.012	0.2619	0.0173	54162	0.4897	Alzheimer's disease || ||	1.26e-09	0.00189	766345	Years of schooling || id:ieu-a-1239
rs73344830	G	A	G	A	-0.0172	-0.0043	0.602	0.0161	54162	0.788401	Alzheimer's disease || ||	1.94984e-23	0.00172	766345	Years of schooling || id:ieu-a-1239
rs736282	C	T	C	T	-0.01082	-0.0115	0.5153	0.0155	54162	0.4574	Alzheimer's disease || ||	2.07e-10	0.0017	766345	Years of schooling || id:ieu-a-1239
rs73874335	T	C	T	C	-0.0199	-0.0312	0.05952	0.0322	54162	0.3323	Alzheimer's disease || ||	3.40001e-08	0.00361	766345	Years of schooling || id:ieu-a-1239
rs743316	C	T	C	T	-0.01185	-0.0023	0.182	0.0199	54162	0.9071	Alzheimer's disease || ||	1.2e-08	0.00208	766345	Years of schooling || id:ieu-a-1239
rs74643044	C	T	C	T	0.02323	0.0629	0.02721	0.0455	54162	0.1668	Alzheimer's disease || ||	1.79999e-09	0.00386	766345	Years of schooling || id:ieu-a-1239
rs74701752	T	G	T	G	0.01591	-0.0327	0.09524	0.0272	54162	0.2288	Alzheimer's disease || ||	2.38002e-08	0.00285	766345	Years of schooling || id:ieu-a-1239
rs7481514	G	A	G	A	0.01072	-0.014	0.665	0.017	54162	0.4115	Alzheimer's disease || ||	1.55998e-09	0.00178	766345	Years of schooling || id:ieu-a-1239
rs74998289	G	T	G	T	-0.01821	-0.0519	0.2398	0.022	54162	0.0180801	Alzheimer's disease || ||	1.31009e-17	0.00213	766345	Years of schooling || id:ieu-a-1239
rs7594904	C	T	C	T	0.00969	-0.0091	0.4184	0.0156	54162	0.559099	Alzheimer's disease || ||	2.04998e-08	0.00173	766345	Years of schooling || id:ieu-a-1239
rs76076331	T	C	T	C	0.01873	0.0054	0.131	0.024	54162	0.823	Alzheimer's disease || ||	4.40048e-14	0.00248	766345	Years of schooling || id:ieu-a-1239
rs7650602	C	T	C	T	0.00939	-0.0223	0.4286	0.0164	54162	0.1719	Alzheimer's disease || ||	4.10998e-08	0.00171	766345	Years of schooling || id:ieu-a-1239
rs77025239	A	G	A	G	-0.01422	0.0223	0.1088	0.0224	54162	0.3182	Alzheimer's disease || ||	1.32999e-09	0.00234	766345	Years of schooling || id:ieu-a-1239
rs77702622	A	G	A	G	-0.02447	0.0574	0.07653	0.0381	54162	0.132	Alzheimer's disease || ||	2.9902e-12	0.00351	766345	Years of schooling || id:ieu-a-1239
rs77835879	G	A	G	A	-0.01601	-0.0108	0.09014	0.029	54162	0.7097	Alzheimer's disease || ||	2.67997e-08	0.00288	766345	Years of schooling || id:ieu-a-1239
rs7796203	A	G	A	G	-0.01074	-0.0041	0.5255	0.0157	54162	0.7922	Alzheimer's disease || ||	3.59998e-10	0.00171	766345	Years of schooling || id:ieu-a-1239
rs7808399	G	A	G	A	0.0107	-0.0283	0.5476	0.0156	54162	0.0703704	Alzheimer's disease || ||	3.77998e-10	0.00171	766345	Years of schooling || id:ieu-a-1239
rs7833201	C	G	C	G	-0.01532	0.0744	0.1344	0.0283	54162	0.00857808	Alzheimer's disease || ||	5.04998e-09	0.00262	766345	Years of schooling || id:ieu-a-1239
rs7863447	A	G	A	G	0.01678	0.0159	0.8333	0.0222	54162	0.4719	Alzheimer's disease || ||	5.91017e-13	0.00233	766345	Years of schooling || id:ieu-a-1239
rs78721320	A	G	A	G	0.01307	-0.0126	0.2041	0.0241	54162	0.601999	Alzheimer's disease || ||	2.27997e-09	0.00219	766345	Years of schooling || id:ieu-a-1239
rs7924036	T	G	T	G	0.01501	-0.0089	0.5391	0.0157	54162	0.5713	Alzheimer's disease || ||	1.07004e-18	0.0017	766345	Years of schooling || id:ieu-a-1239
rs79265434	G	A	G	A	0.02331	-0.0124	0.1173	0.025	54162	0.6194	Alzheimer's disease || ||	6.07995e-19	0.00262	766345	Years of schooling || id:ieu-a-1239
rs79269403	A	G	A	G	0.01447	-0.0144	0.2228	0.019	54162	0.4496	Alzheimer's disease || ||	1.17004e-12	0.00204	766345	Years of schooling || id:ieu-a-1239
rs7928622	T	A	T	A	0.01011	-0.0155	0.3078	0.0174	54162	0.3743	Alzheimer's disease || ||	2.52e-08	0.00181	766345	Years of schooling || id:ieu-a-1239
rs795230	T	C	T	C	0.00952	0.0004	0.4184	0.016	54162	0.979	Alzheimer's disease || ||	2.97002e-08	0.00172	766345	Years of schooling || id:ieu-a-1239
rs79523955	G	A	G	A	-0.01802	0.0278	0.09524	0.0506	54162	0.582801	Alzheimer's disease || ||	1.86999e-10	0.00283	766345	Years of schooling || id:ieu-a-1239
rs7977614	G	A	G	A	0.01325	0.0096	0.3078	0.0187	54162	0.6095	Alzheimer's disease || ||	2.08978e-11	0.00198	766345	Years of schooling || id:ieu-a-1239
rs7993663	C	T	C	T	0.0118	-0.016	0.3571	0.016	54162	0.3168	Alzheimer's disease || ||	3.25012e-11	0.00178	766345	Years of schooling || id:ieu-a-1239
rs8008382	C	T	C	T	0.01208	-0.0482	0.6871	0.017	54162	0.00453701	Alzheimer's disease || ||	6.12068e-11	0.00185	766345	Years of schooling || id:ieu-a-1239
rs80171383	A	G	A	G	0.0145	-0.0118	0.1241	0.0237	54162	0.617	Alzheimer's disease || ||	1.83e-09	0.00241	766345	Years of schooling || id:ieu-a-1239
rs8020034	A	G	A	G	0.01782	-0.0332	0.2058	0.0206	54162	0.1073	Alzheimer's disease || ||	1.17004e-15	0.00223	766345	Years of schooling || id:ieu-a-1239
rs818415	G	T	G	T	0.01235	0.0005	0.182	0.0195	54162	0.9791	Alzheimer's disease || ||	1.72001e-08	0.00219	766345	Years of schooling || id:ieu-a-1239
rs837080	C	T	C	T	0.01092	-0.019	0.4932	0.0156	54162	0.2228	Alzheimer's disease || ||	1.43001e-10	0.0017	766345	Years of schooling || id:ieu-a-1239
rs892612	C	A	C	A	0.01464	-0.009	0.8418	0.0216	54162	0.6754	Alzheimer's disease || ||	6.62995e-10	0.00237	766345	Years of schooling || id:ieu-a-1239
rs894067	A	G	A	G	0.01041	-0.0221	0.3929	0.0159	54162	0.1627	Alzheimer's disease || ||	2.74e-09	0.00175	766345	Years of schooling || id:ieu-a-1239
rs9289300	C	T	C	T	0.01512	-0.0285	0.1837	0.0213	54162	0.1808	Alzheimer's disease || ||	1.09999e-10	0.00234	766345	Years of schooling || id:ieu-a-1239
rs9320493	G	A	G	A	-0.01394	0.014	0.8639	0.0217	54162	0.518	Alzheimer's disease || ||	6.12999e-09	0.0024	766345	Years of schooling || id:ieu-a-1239
rs9342482	T	G	T	G	0.01264	-0.0011	0.2908	0.018	54162	0.9528	Alzheimer's disease || ||	1.36e-10	0.00197	766345	Years of schooling || id:ieu-a-1239
rs9349956	C	A	C	A	0.01881	0.0249	0.2398	0.022	54162	0.2583	Alzheimer's disease || ||	6.28058e-17	0.00225	766345	Years of schooling || id:ieu-a-1239
rs9372625	A	G	A	G	0.02383	-0.0257	0.4133	0.0162	54162	0.1124	Alzheimer's disease || ||	6.75927e-42	0.00176	766345	Years of schooling || id:ieu-a-1239
rs9384679	T	C	T	C	-0.00959	-0.0437	0.4082	0.0165	54162	0.00828705	Alzheimer's disease || ||	4.88e-08	0.00176	766345	Years of schooling || id:ieu-a-1239
rs9386319	G	A	G	A	0.00991	0.0025	0.4269	0.0158	54162	0.8732	Alzheimer's disease || ||	1.26999e-08	0.00174	766345	Years of schooling || id:ieu-a-1239
rs9386787	G	A	G	A	0.00958	0.0368	0.5136	0.0155	54162	0.0172898	Alzheimer's disease || ||	1.81999e-08	0.0017	766345	Years of schooling || id:ieu-a-1239
rs9436866	C	A	C	A	0.01882	-0.0237	0.09524	0.0258	54162	0.3586	Alzheimer's disease || ||	7.45075e-11	0.00289	766345	Years of schooling || id:ieu-a-1239
rs9503598	A	G	A	G	0.01079	0.0048	0.4388	0.0158	54162	0.763099	Alzheimer's disease || ||	3.11997e-10	0.00171	766345	Years of schooling || id:ieu-a-1239
rs9529119	G	C	G	C	-0.01295	0.0282	0.8027	0.0189	54162	0.1359	Alzheimer's disease || ||	2.13e-10	0.00204	766345	Years of schooling || id:ieu-a-1239
rs9556958	T	C	T	C	-0.0108	-0.025	0.5289	0.0158	54162	0.1142	Alzheimer's disease || ||	2.38002e-10	0.0017	766345	Years of schooling || id:ieu-a-1239
rs9616906	A	G	A	G	0.01497	0.0041	0.4235	0.0175	54162	0.8147	Alzheimer's disease || ||	2.92012e-18	0.00172	766345	Years of schooling || id:ieu-a-1239
rs9679654	C	T	C	T	0.01042	-0.005	0.4847	0.0161	54162	0.754201	Alzheimer's disease || ||	1.29e-09	0.00172	766345	Years of schooling || id:ieu-a-1239
rs9882532	C	T	C	T	-0.01208	-0.0029	0.3639	0.0161	54162	0.8571	Alzheimer's disease || ||	8.16959e-12	0.00177	766345	Years of schooling || id:ieu-a-1239
rs9914918	A	G	A	G	0.01155	-0.0137	0.2823	0.0172	54162	0.4272	Alzheimer's disease || ||	8.9e-10	0.00189	766345	Years of schooling || id:ieu-a-1239
rs9933256	G	A	G	A	-0.01134	0.046	0.4082	0.019	54162	0.0157899	Alzheimer's disease || ||	4.56983e-11	0.00172	766345	Years of schooling || id:ieu-a-1239
rs9936270	T	C	T	C	-0.0136	-0.0264	0.3078	0.0184	54162	0.1511	Alzheimer's disease || ||	6.42984e-12	0.00198	766345	Years of schooling || id:ieu-a-1239
rs9938678	T	A	T	A	0.01355	-0.0168	0.2432	0.0186	54162	0.3669	Alzheimer's disease || ||	4.12003e-11	0.00205	766345	Years of schooling || id:ieu-a-1239
rs9964724	T	C	T	C	0.01978	-0.0023	0.6599	0.0171	54162	0.893	Alzheimer's disease || ||	2.66011e-27	0.00183	766345	Years of schooling || id:ieu-a-1239
rs9995567	A	G	A	G	0.00998	-0.0146	0.3827	0.016	54162	0.3618	Alzheimer's disease || ||	1.93001e-08	0.00178	766345	Years of schooling || id:ieu-a-1239
rs10077431	A	C	A	C	-0.0487	-0.0139	0.214668	0.019	54162	0.4642	Alzheimer's disease || ||	4.75499e-08	0.0089	62892	Type 2 diabetes || id:ebi-a-GCST006867
rs10087241	A	G	A	G	-0.0475	-0.016	0.594893	0.0161	54162	0.3193	Alzheimer's disease || ||	2.79602e-09	0.008	62892	Type 2 diabetes || id:ebi-a-GCST006867
rs10100265	C	A	C	A	-0.0491	-0.0051	0.61049	0.0159	54162	0.750699	Alzheimer's disease || ||	6.28796e-10	0.0079	62892	Type 2 diabetes || id:ebi-a-GCST006867
rs10114341	C	T	C	T	-0.0409	-0.0057	0.440754	0.0159	54162	0.7173	Alzheimer's disease || ||	1.15101e-08	0.0072	62892	Type 2 diabetes || id:ebi-a-GCST006867
rs10401969	C	T	C	T	0.0921	-0.0163	0.0765858	0.0346	54162	0.6368	Alzheimer's disease || ||	4.13143e-12	0.0133	62892	Type 2 diabetes || id:ebi-a-GCST006867
rs1050226	G	A	G	A	-0.0491	-0.0395	0.406792	0.0159	54162	0.0129399	Alzheimer's disease || ||	3.34195e-11	0.0074	62892	Type 2 diabetes || id:ebi-a-GCST006867
rs1061813	A	G	A	G	-0.0429	-0.0006	0.537119	0.0164	54162	0.9699	Alzheimer's disease || ||	3.37202e-09	0.0073	62892	Type 2 diabetes || id:ebi-a-GCST006867
rs10740322	A	G	A	G	0.0477	0.0251	0.687104	0.0168	54162	0.1368	Alzheimer's disease || ||	2.10902e-08	0.0085	62892	Type 2 diabetes || id:ebi-a-GCST006867
rs10811661	C	T	C	T	-0.1569	0.0059	0.173605	0.0207	54162	0.7759	Alzheimer's disease || ||	4.13238e-58	0.0098	62892	Type 2 diabetes || id:ebi-a-GCST006867
rs10830963	G	C	G	C	0.0909	0.0146	0.275768	0.0193	54162	0.4473	Alzheimer's disease || ||	5.84655e-30	0.008	62892	Type 2 diabetes || id:ebi-a-GCST006867
rs10842994	T	C	T	C	-0.0755	-0.0191	0.197025	0.0206	54162	0.354	Alzheimer's disease || ||	1.01508e-16	0.0091	62892	Type 2 diabetes || id:ebi-a-GCST006867
rs10974438	C	A	C	A	0.0591	0.004	0.351215	0.0171	54162	0.8148	Alzheimer's disease || ||	3.01301e-15	0.0075	62892	Type 2 diabetes || id:ebi-a-GCST006867
rs11098676	C	T	C	T	0.054	-0.0012	0.787639	0.0186	54162	0.9485	Alzheimer's disease || ||	2.02698e-08	0.0096	62892	Type 2 diabetes || id:ebi-a-GCST006867
rs11107116	T	G	T	G	0.0467	0.0164	0.219714	0.0192	54162	0.3928	Alzheimer's disease || ||	3.74999e-08	0.0085	62892	Type 2 diabetes || id:ebi-a-GCST006867
rs11257655	T	C	T	C	0.0737	0.0041	0.206773	0.0198	54162	0.8356	Alzheimer's disease || ||	1.96607e-17	0.0087	62892	Type 2 diabetes || id:ebi-a-GCST006867
rs1127655	T	C	T	C	-0.0438	-0.001	0.529064	0.0159	54162	0.9514	Alzheimer's disease || ||	2.47098e-08	0.0079	62892	Type 2 diabetes || id:ebi-a-GCST006867
rs11708067	G	A	G	A	-0.0965	-0.0354	0.23899	0.0189	54162	0.0612604	Alzheimer's disease || ||	5.93335e-29	0.0086	62892	Type 2 diabetes || id:ebi-a-GCST006867
rs11925227	A	G	A	G	-0.0534	0.0131	0.183439	0.0228	54162	0.5644	Alzheimer's disease || ||	2.24999e-08	0.0095	62892	Type 2 diabetes || id:ebi-a-GCST006867
rs11926707	C	T	C	T	0.0463	-0.0055	0.625556	0.017	54162	0.7462	Alzheimer's disease || ||	1.68601e-08	0.0082	62892	Type 2 diabetes || id:ebi-a-GCST006867
rs12088739	G	A	G	A	-0.0884	-0.0249	0.0898481	0.0265	54162	0.3481	Alzheimer's disease || ||	9.79264e-12	0.013	62892	Type 2 diabetes || id:ebi-a-GCST006867
rs12299509	G	A	G	A	0.0467	-0.0223	0.478622	0.018	54162	0.2153	Alzheimer's disease || ||	2.08699e-10	0.0073	62892	Type 2 diabetes || id:ebi-a-GCST006867
rs12617659	T	C	T	C	-0.0685	0.0003	0.147238	0.024	54162	0.9891	Alzheimer's disease || ||	2.82683e-11	0.0103	62892	Type 2 diabetes || id:ebi-a-GCST006867
rs12910825	G	A	G	A	0.0517	0.0241	0.360391	0.0165	54162	0.1449	Alzheimer's disease || ||	2.16421e-12	0.0074	62892	Type 2 diabetes || id:ebi-a-GCST006867
rs12945601	C	T	C	T	-0.048	-0.0118	0.613603	0.0158	54162	0.4559	Alzheimer's disease || ||	1.71799e-09	0.008	62892	Type 2 diabetes || id:ebi-a-GCST006867
rs12970134	A	G	A	G	0.0555	-0.0352	0.26512	0.0175	54162	0.0443905	Alzheimer's disease || ||	5.30884e-12	0.008	62892	Type 2 diabetes || id:ebi-a-GCST006867
rs13234269	A	T	A	T	-0.0583	0	0.492515	0.0161	54162	0.9984	Alzheimer's disease || ||	6.9775e-14	0.0078	62892	Type 2 diabetes || id:ebi-a-GCST006867
rs13239186	T	C	T	C	0.0539	-0.0001	0.302029	0.0178	54162	0.9968	Alzheimer's disease || ||	2.70402e-10	0.0085	62892	Type 2 diabetes || id:ebi-a-GCST006867
rs1333039	C	G	C	G	0.0534	0.0444	0.598788	0.0161	54162	0.00565002	Alzheimer's disease || ||	5.64157e-13	0.0074	62892	Type 2 diabetes || id:ebi-a-GCST006867
rs13330951	G	A	G	A	-0.0456	0.0118	0.488314	0.016	54162	0.4605	Alzheimer's disease || ||	1.53801e-08	0.0081	62892	Type 2 diabetes || id:ebi-a-GCST006867
rs13389219	T	C	T	C	-0.0722	-0.0271	0.394368	0.0159	54162	0.0887095	Alzheimer's disease || ||	2.1062e-22	0.0074	62892	Type 2 diabetes || id:ebi-a-GCST006867
rs1359790	A	G	A	G	-0.0796	0.0004	0.2867	0.0178	54162	0.9803	Alzheimer's disease || ||	2.79512e-23	0.008	62892	Type 2 diabetes || id:ebi-a-GCST006867
rs1496653	G	A	G	A	-0.0769	0.0041	0.204782	0.0193	54162	0.8327	Alzheimer's disease || ||	2.57217e-18	0.0088	62892	Type 2 diabetes || id:ebi-a-GCST006867
rs1552224	C	A	C	A	-0.1034	0.005	0.15421	0.0218	54162	0.8171	Alzheimer's disease || ||	8.63575e-25	0.0101	62892	Type 2 diabetes || id:ebi-a-GCST006867
rs16988333	G	A	G	A	-0.0745	0.0383	0.0904035	0.0274	54162	0.1624	Alzheimer's disease || ||	9.16896e-09	0.013	62892	Type 2 diabetes || id:ebi-a-GCST006867
rs17086692	T	G	T	G	-0.0467	0.0258	0.313426	0.0164	54162	0.1171	Alzheimer's disease || ||	2.48102e-08	0.0084	62892	Type 2 diabetes || id:ebi-a-GCST006867
rs17168486	T	C	T	C	0.0742	-0.0254	0.173603	0.0215	54162	0.2364	Alzheimer's disease || ||	2.17721e-15	0.0094	62892	Type 2 diabetes || id:ebi-a-GCST006867
rs17334919	T	C	T	C	-0.1398	-0.0708	0.100218	0.027	54162	0.00871706	Alzheimer's disease || ||	6.68652e-28	0.0128	62892	Type 2 diabetes || id:ebi-a-GCST006867
rs17405722	A	G	A	G	0.087	0.0113	0.0741526	0.0296	54162	0.702	Alzheimer's disease || ||	2.27798e-09	0.0146	62892	Type 2 diabetes || id:ebi-a-GCST006867
rs17411031	G	C	G	C	-0.045	0.0081	0.261729	0.0171	54162	0.636	Alzheimer's disease || ||	3.03501e-08	0.0081	62892	Type 2 diabetes || id:ebi-a-GCST006867
rs1758632	G	C	G	C	0.0491	-0.002	0.623407	0.0159	54162	0.9023	Alzheimer's disease || ||	1.36e-09	0.0081	62892	Type 2 diabetes || id:ebi-a-GCST006867
rs17631783	T	C	T	C	-0.0487	0.0289	0.26346	0.019	54162	0.1272	Alzheimer's disease || ||	3.94903e-08	0.0089	62892	Type 2 diabetes || id:ebi-a-GCST006867
rs17791483	G	A	G	A	-0.102	0.0031	0.0625883	0.0332	54162	0.9249	Alzheimer's disease || ||	3.41901e-12	0.0147	62892	Type 2 diabetes || id:ebi-a-GCST006867
rs1899951	T	C	T	C	-0.1118	-0.0297	0.123288	0.0243	54162	0.2208	Alzheimer's disease || ||	1.63682e-24	0.0109	62892	Type 2 diabetes || id:ebi-a-GCST006867
rs2191348	T	G	T	G	0.0652	0.0113	0.546935	0.0159	54162	0.4793	Alzheimer's disease || ||	3.44429e-19	0.0073	62892	Type 2 diabetes || id:ebi-a-GCST006867
rs2237892	T	C	T	C	-0.096	0.0175	0.0624896	0.0341	54162	0.608199	Alzheimer's disease || ||	8.74601e-10	0.0157	62892	Type 2 diabetes || id:ebi-a-GCST006867
rs2261181	T	C	T	C	0.0985	-0.0287	0.09647	0.0258	54162	0.2662	Alzheimer's disease || ||	9.1791e-17	0.0118	62892	Type 2 diabetes || id:ebi-a-GCST006867
rs2292662	T	C	T	C	-0.0629	0.0105	0.151272	0.0219	54162	0.6316	Alzheimer's disease || ||	1.236e-08	0.0111	62892	Type 2 diabetes || id:ebi-a-GCST006867
rs2294120	G	A	G	A	-0.0443	0.0141	0.455879	0.0166	54162	0.3957	Alzheimer's disease || ||	1.61801e-08	0.0079	62892	Type 2 diabetes || id:ebi-a-GCST006867
rs2296173	G	A	G	A	0.065	0.0291	0.212011	0.0195	54162	0.1364	Alzheimer's disease || ||	7.65773e-14	0.0087	62892	Type 2 diabetes || id:ebi-a-GCST006867
rs2299383	T	C	T	C	0.0412	0.0282	0.423455	0.0161	54162	0.0797701	Alzheimer's disease || ||	1.49001e-08	0.0073	62892	Type 2 diabetes || id:ebi-a-GCST006867
rs243019	C	T	C	T	0.0566	-0.0154	0.455831	0.0156	54162	0.3248	Alzheimer's disease || ||	2.28981e-15	0.0071	62892	Type 2 diabetes || id:ebi-a-GCST006867
rs2493394	G	A	G	A	0.073	0.006	0.107338	0.0251	54162	0.8096	Alzheimer's disease || ||	1.15101e-10	0.0113	62892	Type 2 diabetes || id:ebi-a-GCST006867
rs2796441	A	G	A	G	-0.0715	0.014	0.416458	0.017	54162	0.4106	Alzheimer's disease || ||	1.962e-22	0.0073	62892	Type 2 diabetes || id:ebi-a-GCST006867
rs2820426	G	A	G	A	0.0521	-0.0221	0.610058	0.0165	54162	0.1806	Alzheimer's disease || ||	1.30197e-12	0.0073	62892	Type 2 diabetes || id:ebi-a-GCST006867
rs2867125	C	T	C	T	0.0601	-0.036	0.827825	0.0207	54162	0.0821107	Alzheimer's disease || ||	4.32504e-10	0.0096	62892	Type 2 diabetes || id:ebi-a-GCST006867
rs2908282	A	G	A	G	0.0552	0.0155	0.177395	0.0204	54162	0.4478	Alzheimer's disease || ||	4.25001e-09	0.0094	62892	Type 2 diabetes || id:ebi-a-GCST006867
rs2925979	C	T	C	T	-0.0534	-0.0063	0.70085	0.0175	54162	0.7195	Alzheimer's disease || ||	9.0615e-12	0.0078	62892	Type 2 diabetes || id:ebi-a-GCST006867
rs2972144	G	A	G	A	0.0913	0.0129	0.645367	0.0159	54162	0.4165	Alzheimer's disease || ||	2.55094e-34	0.0075	62892	Type 2 diabetes || id:ebi-a-GCST006867
rs340874	C	T	C	T	0.0626	-0.0372	0.563904	0.0161	54162	0.0213398	Alzheimer's disease || ||	8.40621e-18	0.0073	62892	Type 2 diabetes || id:ebi-a-GCST006867
rs348330	A	G	A	G	-0.0487	0.0047	0.633451	0.017	54162	0.780001	Alzheimer's disease || ||	1.86402e-09	0.0081	62892	Type 2 diabetes || id:ebi-a-GCST006867
rs3756784	G	T	G	T	0.0505	0.0249	0.185838	0.021	54162	0.2361	Alzheimer's disease || ||	2.58899e-08	0.0091	62892	Type 2 diabetes || id:ebi-a-GCST006867
rs3802177	A	G	A	G	-0.1217	-0.0334	0.311281	0.0171	54162	0.0508195	Alzheimer's disease || ||	2.32113e-52	0.008	62892	Type 2 diabetes || id:ebi-a-GCST006867
rs4506565	T	A	T	A	0.2796	-0.008	0.313058	0.0166	54162	0.6295	Alzheimer's disease || ||	1e-200	0.0075	62892	Type 2 diabetes || id:ebi-a-GCST006867
rs459193	G	A	G	A	0.0711	-0.0007	0.745338	0.0185	54162	0.9681	Alzheimer's disease || ||	8.80846e-18	0.0083	62892	Type 2 diabetes || id:ebi-a-GCST006867
rs4686471	C	T	C	T	0.0534	-0.0075	0.609775	0.0158	54162	0.6344	Alzheimer's disease || ||	4.28154e-11	0.0081	62892	Type 2 diabetes || id:ebi-a-GCST006867
rs4810426	T	C	T	C	0.0726	0.0146	0.0967888	0.0255	54162	0.5671	Alzheimer's disease || ||	2.14798e-08	0.013	62892	Type 2 diabetes || id:ebi-a-GCST006867
rs4823182	G	A	G	A	0.0482	-0.0176	0.335748	0.0163	54162	0.2777	Alzheimer's disease || ||	3.35799e-10	0.0077	62892	Type 2 diabetes || id:ebi-a-GCST006867
rs4865796	A	G	A	G	0.053	0.0123	0.69309	0.0167	54162	0.4635	Alzheimer's disease || ||	1.32892e-11	0.0078	62892	Type 2 diabetes || id:ebi-a-GCST006867
rs516946	C	T	C	T	0.0824	-0.0122	0.760633	0.0179	54162	0.4957	Alzheimer's disease || ||	3.15864e-22	0.0085	62892	Type 2 diabetes || id:ebi-a-GCST006867
rs5215	T	C	T	C	-0.0678	-0.0291	0.639941	0.0165	54162	0.0778198	Alzheimer's disease || ||	2.08882e-20	0.0073	62892	Type 2 diabetes || id:ebi-a-GCST006867
rs576674	A	G	A	G	-0.0654	-0.0123	0.832515	0.0208	54162	0.554201	Alzheimer's disease || ||	1.79184e-11	0.0097	62892	Type 2 diabetes || id:ebi-a-GCST006867
rs6059662	G	A	G	A	0.0446	-0.0112	0.663176	0.0172	54162	0.515901	Alzheimer's disease || ||	1.51199e-08	0.0079	62892	Type 2 diabetes || id:ebi-a-GCST006867
rs6066138	A	G	A	G	-0.049	-0.0272	0.278362	0.0177	54162	0.1239	Alzheimer's disease || ||	1.92899e-09	0.0082	62892	Type 2 diabetes || id:ebi-a-GCST006867
rs61953351	T	G	T	G	-0.07	-0.01	0.249902	0.0188	54162	0.596401	Alzheimer's disease || ||	1.97606e-14	0.0091	62892	Type 2 diabetes || id:ebi-a-GCST006867
rs622217	C	T	C	T	-0.0485	0.0249	0.483932	0.0156	54162	0.1114	Alzheimer's disease || ||	3.12903e-10	0.0077	62892	Type 2 diabetes || id:ebi-a-GCST006867
rs6494307	G	C	G	C	-0.0443	0.0052	0.426225	0.0157	54162	0.7395	Alzheimer's disease || ||	1.66802e-08	0.0078	62892	Type 2 diabetes || id:ebi-a-GCST006867
rs6515236	C	A	C	A	-0.0504	-0.0161	0.24933	0.018	54162	0.3706	Alzheimer's disease || ||	3.34303e-08	0.0091	62892	Type 2 diabetes || id:ebi-a-GCST006867
rs67232546	T	C	T	C	0.0596	0.006	0.209222	0.0209	54162	0.772999	Alzheimer's disease || ||	4.66101e-10	0.0096	62892	Type 2 diabetes || id:ebi-a-GCST006867
rs6795735	T	C	T	C	-0.0558	-0.0176	0.410912	0.0162	54162	0.2759	Alzheimer's disease || ||	1.63005e-14	0.0073	62892	Type 2 diabetes || id:ebi-a-GCST006867
rs7138300	T	C	T	C	-0.0443	0.0142	0.556835	0.0154	54162	0.3577	Alzheimer's disease || ||	5.64898e-10	0.0072	62892	Type 2 diabetes || id:ebi-a-GCST006867
rs7144011	T	G	T	G	0.0482	0.0029	0.221063	0.0206	54162	0.8863	Alzheimer's disease || ||	1.63599e-08	0.0085	62892	Type 2 diabetes || id:ebi-a-GCST006867
rs7177055	A	G	A	G	0.0647	-0.0129	0.718289	0.017	54162	0.4458	Alzheimer's disease || ||	2.746e-16	0.0079	62892	Type 2 diabetes || id:ebi-a-GCST006867
rs7185735	G	A	G	A	0.1056	0.0098	0.397306	0.0161	54162	0.542199	Alzheimer's disease || ||	1.59001e-47	0.0073	62892	Type 2 diabetes || id:ebi-a-GCST006867
rs7240767	C	T	C	T	0.0451	-0.0148	0.383677	0.0165	54162	0.3707	Alzheimer's disease || ||	2.157e-08	0.0081	62892	Type 2 diabetes || id:ebi-a-GCST006867
rs735949	C	T	C	T	-0.0711	0.0076	0.14115	0.0229	54162	0.7413	Alzheimer's disease || ||	1.94581e-11	0.0106	62892	Type 2 diabetes || id:ebi-a-GCST006867
rs7561798	G	A	G	A	0.04	-0.0036	0.482171	0.0155	54162	0.8136	Alzheimer's disease || ||	2.79402e-08	0.0072	62892	Type 2 diabetes || id:ebi-a-GCST006867
rs7572970	G	A	G	A	0.059	-0.0069	0.722047	0.0171	54162	0.687401	Alzheimer's disease || ||	1.39091e-11	0.0087	62892	Type 2 diabetes || id:ebi-a-GCST006867
rs7619041	A	T	A	T	-0.0431	-0.0311	0.512919	0.0155	54162	0.0441896	Alzheimer's disease || ||	2.756e-08	0.0078	62892	Type 2 diabetes || id:ebi-a-GCST006867
rs7651090	G	A	G	A	0.1204	0.015	0.313377	0.0166	54162	0.3653	Alzheimer's disease || ||	3.8539e-57	0.0076	62892	Type 2 diabetes || id:ebi-a-GCST006867
rs7685296	T	C	T	C	-0.0511	0.046	0.279365	0.0186	54162	0.0132501	Alzheimer's disease || ||	2.31702e-10	0.0081	62892	Type 2 diabetes || id:ebi-a-GCST006867
rs77258096	A	C	A	C	-0.1171	0.0265	0.101383	0.0299	54162	0.3749	Alzheimer's disease || ||	1.7832e-18	0.0134	62892	Type 2 diabetes || id:ebi-a-GCST006867
rs7729395	T	C	T	C	0.1373	0.0609	0.0509409	0.0615	54162	0.3224	Alzheimer's disease || ||	1.10103e-17	0.016	62892	Type 2 diabetes || id:ebi-a-GCST006867
rs7756992	G	A	G	A	0.1297	-0.0078	0.266896	0.0171	54162	0.650401	Alzheimer's disease || ||	5.99929e-62	0.0078	62892	Type 2 diabetes || id:ebi-a-GCST006867
rs7786095	G	A	G	A	-0.0743	0.0141	0.10386	0.0303	54162	0.6428	Alzheimer's disease || ||	9.64295e-09	0.0129	62892	Type 2 diabetes || id:ebi-a-GCST006867
rs780094	C	T	C	T	0.0692	0.0027	0.612845	0.0161	54162	0.8673	Alzheimer's disease || ||	5.15941e-21	0.0074	62892	Type 2 diabetes || id:ebi-a-GCST006867
rs7845219	C	T	C	T	-0.0422	0.0485	0.492786	0.016	54162	0.002399	Alzheimer's disease || ||	4.54496e-09	0.0072	62892	Type 2 diabetes || id:ebi-a-GCST006867
rs7923866	T	C	T	C	-0.0972	0.0017	0.378775	0.0163	54162	0.9177	Alzheimer's disease || ||	9.33684e-40	0.0074	62892	Type 2 diabetes || id:ebi-a-GCST006867
rs7929543	C	A	C	A	0.0828	0.0604	0.0831599	0.0278	54162	0.0297297	Alzheimer's disease || ||	2.19902e-09	0.0138	62892	Type 2 diabetes || id:ebi-a-GCST006867
rs8068804	A	G	A	G	0.0587	-0.0258	0.325097	0.0165	54162	0.1193	Alzheimer's disease || ||	4.41062e-14	0.0078	62892	Type 2 diabetes || id:ebi-a-GCST006867
rs8108269	G	T	G	T	0.0644	-0.0367	0.281015	0.0176	54162	0.03708	Alzheimer's disease || ||	3.11387e-16	0.0079	62892	Type 2 diabetes || id:ebi-a-GCST006867
rs825476	T	C	T	C	0.0524	-0.0074	0.580549	0.0159	54162	0.643	Alzheimer's disease || ||	6.80456e-13	0.0073	62892	Type 2 diabetes || id:ebi-a-GCST006867
rs840967	A	C	A	C	-0.0497	-0.0332	0.605922	0.0159	54162	0.0362903	Alzheimer's disease || ||	5.44202e-10	0.008	62892	Type 2 diabetes || id:ebi-a-GCST006867
rs849135	A	G	A	G	-0.0999	0.0418	0.499052	0.0155	54162	0.00707799	Alzheimer's disease || ||	1.04112e-43	0.0072	62892	Type 2 diabetes || id:ebi-a-GCST006867
rs853974	C	T	C	T	-0.0601	0.0103	0.737586	0.0176	54162	0.5582	Alzheimer's disease || ||	7.85778e-12	0.0088	62892	Type 2 diabetes || id:ebi-a-GCST006867
rs9369425	A	G	A	G	-0.0546	-0.0248	0.708185	0.0178	54162	0.1631	Alzheimer's disease || ||	1.12899e-10	0.0085	62892	Type 2 diabetes || id:ebi-a-GCST006867
rs963740	T	A	T	A	-0.0479	-0.0227	0.294299	0.0169	54162	0.1793	Alzheimer's disease || ||	2.23198e-08	0.0086	62892	Type 2 diabetes || id:ebi-a-GCST006867
rs982077	G	A	G	A	-0.0453	0.0024	0.565521	0.0163	54162	0.882	Alzheimer's disease || ||	2.57697e-10	0.0072	62892	Type 2 diabetes || id:ebi-a-GCST006867
rs9844972	C	G	C	G	0.0956	-0.072	0.0697229	0.0321	54162	0.02476	Alzheimer's disease || ||	1.02601e-10	0.0148	62892	Type 2 diabetes || id:ebi-a-GCST006867
rs9894220	G	A	G	A	-0.0585	-0.0025	0.43374	0.016	54162	0.8766	Alzheimer's disease || ||	1.51705e-13	0.0079	62892	Type 2 diabetes || id:ebi-a-GCST006867
rs993380	G	A	G	A	-0.0507	-0.0087	0.66555	0.0161	54162	0.5864	Alzheimer's disease || ||	4.58701e-10	0.0081	62892	Type 2 diabetes || id:ebi-a-GCST006867
rs9940149	A	G	A	G	-0.058	0.0076	0.178556	0.0216	54162	0.7258	Alzheimer's disease || ||	9.29095e-10	0.0095	62892	Type 2 diabetes || id:ebi-a-GCST006867
rs10088180	G	A	G	A	-0.0228	-0.0302	0.6781	0.0178	54162	0.09064	Alzheimer's disease || ||	6.01797e-10	0.004	187142	Total cholesterol || id:ieu-a-301
rs10468017	T	C	T	C	0.0617	-0.0317	0.2757	0.018	54162	0.0782708	Alzheimer's disease || ||	7.23269e-48	0.004	181378	Total cholesterol || id:ieu-a-301
rs10773003	A	G	A	G	0.0369	-0.0303	0.08839	0.026	54162	0.2444	Alzheimer's disease || ||	4.08301e-09	0.0058	187101	Total cholesterol || id:ieu-a-301
rs10832962	T	C	T	C	0.0315	-0.0006	0.719	0.0183	54162	0.9758	Alzheimer's disease || ||	1.53886e-14	0.0039	187161	Total cholesterol || id:ieu-a-301
rs10900221	A	G	A	G	0.0255	0.0055	0.2731	0.0179	54162	0.760901	Alzheimer's disease || ||	7.96306e-09	0.0041	186785	Total cholesterol || id:ieu-a-301
rs10904908	G	A	G	A	0.025	0.0024	0.4538	0.0159	54162	0.8826	Alzheimer's disease || ||	2.60076e-11	0.0036	187112	Total cholesterol || id:ieu-a-301
rs11153594	T	C	T	C	-0.029	0.0184	0.3918	0.0157	54162	0.2404	Alzheimer's disease || ||	1.2659e-14	0.0036	187230	Total cholesterol || id:ieu-a-301
rs112201728	T	C	T	C	0.0581	-0.0681	0.05805	0.03	54162	0.0233002	Alzheimer's disease || ||	1.19501e-08	0.0099	92668	Total cholesterol || id:ieu-a-301
rs11220462	A	G	A	G	0.0474	0.0183	0.1425	0.0225	54162	0.4154	Alzheimer's disease || ||	5.48656e-15	0.0058	156953	Total cholesterol || id:ieu-a-301
rs11563251	T	C	T	C	0.0368	0.0315	0.1253	0.0265	54162	0.2342	Alzheimer's disease || ||	1.26599e-09	0.0059	187107	Total cholesterol || id:ieu-a-301
rs11694172	G	A	G	A	0.0277	0.0049	0.2164	0.0193	54162	0.7986	Alzheimer's disease || ||	1.95101e-09	0.0041	187092	Total cholesterol || id:ieu-a-301
rs11753995	A	G	A	G	0.0489	-0.0038	0.1464	0.0212	54162	0.859	Alzheimer's disease || ||	1.83908e-23	0.0048	187264	Total cholesterol || id:ieu-a-301
rs11789603	T	C	T	C	0.0427	0.0209	0.08971	0.0263	54162	0.4274	Alzheimer's disease || ||	1.43913e-11	0.0062	186565	Total cholesterol || id:ieu-a-301
rs11802413	T	C	T	C	0.0287	0.0105	0.5369	0.0159	54162	0.5096	Alzheimer's disease || ||	1.57616e-14	0.0035	187138	Total cholesterol || id:ieu-a-301
rs12412743	T	C	T	C	-0.0298	0.0105	0.153	0.0213	54162	0.6234	Alzheimer's disease || ||	6.97606e-10	0.0047	187282	Total cholesterol || id:ieu-a-301
rs12670798	C	T	C	T	0.0364	0.0086	0.2243	0.019	54162	0.6529	Alzheimer's disease || ||	9.47764e-17	0.0041	187287	Total cholesterol || id:ieu-a-301
rs12916	C	T	C	T	0.0684	0.0047	0.4314	0.0164	54162	0.7734	Alzheimer's disease || ||	4.54674e-74	0.0036	182530	Total cholesterol || id:ieu-a-301
rs13315871	A	G	A	G	-0.0355	-0.003	0.08047	0.0264	54162	0.9103	Alzheimer's disease || ||	3.48001e-08	0.0061	187287	Total cholesterol || id:ieu-a-301
rs138777	G	A	G	A	-0.0214	-0.0096	0.6517	0.0163	54162	0.5554	Alzheimer's disease || ||	4.74002e-08	0.0037	185274	Total cholesterol || id:ieu-a-301
rs1535	G	A	G	A	-0.0497	-0.0115	0.3628	0.0163	54162	0.4792	Alzheimer's disease || ||	8.62383e-39	0.0037	182527	Total cholesterol || id:ieu-a-301
rs17526895	G	A	G	A	-0.042	-0.0455	0.07784	0.0289	54162	0.115	Alzheimer's disease || ||	5.77697e-09	0.0067	184199	Total cholesterol || id:ieu-a-301
rs1800562	A	G	A	G	-0.0565	-0.0171	0.04617	0.0328	54162	0.6022	Alzheimer's disease || ||	1.90502e-12	0.0077	185469	Total cholesterol || id:ieu-a-301
rs1800961	T	C	T	C	-0.1062	0.0596	0.0343	0.0467	54162	0.2016	Alzheimer's disease || ||	1.34215e-24	0.0101	156406	Total cholesterol || id:ieu-a-301
rs181360	G	T	G	T	-0.0278	-0.0699	0.1992	0.0203	54162	0.000585801	Alzheimer's disease || ||	7.31897e-10	0.0043	178322	Total cholesterol || id:ieu-a-301
rs1883025	T	C	T	C	-0.0671	0.0705	0.2427	0.0182	54162	0.0001037	Alzheimer's disease || ||	5.7491e-53	0.0042	186557	Total cholesterol || id:ieu-a-301
rs1997243	G	A	G	A	0.0332	0.0249	0.1306	0.021	54162	0.2364	Alzheimer's disease || ||	2.719e-10	0.005	183314	Total cholesterol || id:ieu-a-301
rs2000999	A	G	A	G	0.0617	-0.0082	0.1847	0.0195	54162	0.676401	Alzheimer's disease || ||	6.80456e-41	0.0044	185692	Total cholesterol || id:ieu-a-301
rs2030746	T	C	T	C	0.0199	-0.0047	0.3984	0.0165	54162	0.7756	Alzheimer's disease || ||	3.60296e-08	0.0037	187289	Total cholesterol || id:ieu-a-301
rs2066714	C	T	C	T	0.0442	-0.082	0.1201	0.0332	54162	0.0133999	Alzheimer's disease || ||	1.136e-08	0.0076	93811	Total cholesterol || id:ieu-a-301
rs2073547	G	A	G	A	0.0456	-0.0247	0.1939	0.0211	54162	0.2428	Alzheimer's disease || ||	3.83001e-21	0.0047	184098	Total cholesterol || id:ieu-a-301
rs2156552	T	A	T	A	0.057	-0.0104	0.8219	0.0216	54162	0.630999	Alzheimer's disease || ||	1.2471e-31	0.0047	183439	Total cholesterol || id:ieu-a-301
rs2228603	T	C	T	C	-0.1217	0.0144	0.07124	0.0321	54162	0.653	Alzheimer's disease || ||	1.04906e-62	0.0069	170510	Total cholesterol || id:ieu-a-301
rs2235367	G	A	G	A	0.0357	0.0101	0.4565	0.0153	54162	0.5097	Alzheimer's disease || ||	7.21938e-25	0.0035	185691	Total cholesterol || id:ieu-a-301
rs2244608	G	A	G	A	0.0313	-0.0167	0.3391	0.0169	54162	0.3214	Alzheimer's disease || ||	9.61834e-18	0.0037	187223	Total cholesterol || id:ieu-a-301
rs2255141	G	A	G	A	-0.0314	-0.0129	0.6807	0.0168	54162	0.4451	Alzheimer's disease || ||	6.51328e-16	0.0039	187266	Total cholesterol || id:ieu-a-301
rs2277862	T	C	T	C	-0.0349	0.018	0.1319	0.0218	54162	0.4102	Alzheimer's disease || ||	5.25654e-11	0.0052	185738	Total cholesterol || id:ieu-a-301
rs2287623	A	G	A	G	-0.0273	-0.021	0.595	0.0158	54162	0.184	Alzheimer's disease || ||	4.08507e-12	0.0036	184257	Total cholesterol || id:ieu-a-301
rs2315065	A	C	A	C	0.1102	-0.1055	0.08707	0.0508	54162	0.0378303	Alzheimer's disease || ||	1.09799e-11	0.0158	68430	Total cholesterol || id:ieu-a-301
rs247616	T	C	T	C	0.0499	0.0015	0.2929	0.017	54162	0.9274	Alzheimer's disease || ||	4.46992e-32	0.004	185621	Total cholesterol || id:ieu-a-301
rs2642438	G	A	G	A	0.037	0.0055	0.7454	0.0186	54162	0.7673	Alzheimer's disease || ||	1.28292e-18	0.004	179599	Total cholesterol || id:ieu-a-301
rs2737252	A	G	A	G	-0.0331	0.0331	0.2559	0.0174	54162	0.0566005	Alzheimer's disease || ||	1.63418e-16	0.0039	187202	Total cholesterol || id:ieu-a-301
rs281393	T	C	T	C	-0.0322	-0.0168	0.3734	0.0175	54162	0.3369	Alzheimer's disease || ||	4.25598e-08	0.0055	93067	Total cholesterol || id:ieu-a-301
rs2814982	T	C	T	C	-0.0441	0.0008	0.1069	0.0261	54162	0.9744	Alzheimer's disease || ||	3.6779e-15	0.0057	187263	Total cholesterol || id:ieu-a-301
rs2886232	C	T	C	T	-0.0358	0.0063	0.8799	0.0295	54162	0.8319	Alzheimer's disease || ||	3.874e-08	0.0062	176571	Total cholesterol || id:ieu-a-301
rs2954029	T	A	T	A	-0.0622	-0.0137	0.4683	0.016	54162	0.3908	Alzheimer's disease || ||	2.42103e-65	0.0035	187216	Total cholesterol || id:ieu-a-301
rs314253	C	T	C	T	-0.0233	0.0244	0.3351	0.0166	54162	0.1417	Alzheimer's disease || ||	2.80802e-10	0.0037	183868	Total cholesterol || id:ieu-a-301
rs3184504	C	T	C	T	0.0318	0.0252	0.5343	0.0159	54162	0.1134	Alzheimer's disease || ||	1.62293e-17	0.0037	177714	Total cholesterol || id:ieu-a-301
rs3757354	T	C	T	C	-0.0348	0.0127	0.2098	0.0197	54162	0.5209	Alzheimer's disease || ||	2.21513e-15	0.0042	187247	Total cholesterol || id:ieu-a-301
rs3780181	G	A	G	A	-0.0442	-0.0707	0.05277	0.0306	54162	0.02088	Alzheimer's disease || ||	6.66807e-10	0.0071	186134	Total cholesterol || id:ieu-a-301
rs386003	T	G	T	G	0.0344	0.0207	0.1992	0.0213	54162	0.3301	Alzheimer's disease || ||	4.51898e-08	0.0058	92419	Total cholesterol || id:ieu-a-301
rs4253772	T	C	T	C	0.0322	0.009	0.1187	0.0255	54162	0.724001	Alzheimer's disease || ||	9.8519e-09	0.0058	185188	Total cholesterol || id:ieu-a-301
rs4530754	A	G	A	G	0.0228	0.0216	0.5818	0.0155	54162	0.1621	Alzheimer's disease || ||	1.67799e-09	0.0035	187272	Total cholesterol || id:ieu-a-301
rs4752805	G	A	G	A	0.0251	0.0326	0.2467	0.0184	54162	0.0765297	Alzheimer's disease || ||	1.617e-09	0.0041	187233	Total cholesterol || id:ieu-a-301
rs4883201	G	A	G	A	-0.035	-0.0249	0.1135	0.0263	54162	0.3451	Alzheimer's disease || ||	1.74201e-09	0.0056	187211	Total cholesterol || id:ieu-a-301
rs4988235	A	G	A	G	-0.0308	-0.0203	0.5237	0.0179	54162	0.2575	Alzheimer's disease || ||	3.97466e-14	0.004	183761	Total cholesterol || id:ieu-a-301
rs515135	C	T	C	T	0.1238	-0.0105	0.7823	0.0201	54162	0.6028	Alzheimer's disease || ||	6.38263e-151	0.0046	187291	Total cholesterol || id:ieu-a-301
rs558971	G	A	G	A	0.0398	0.0188	0.5303	0.0157	54162	0.2291	Alzheimer's disease || ||	7.02425e-28	0.0036	187254	Total cholesterol || id:ieu-a-301
rs579459	C	T	C	T	0.062	-0.0004	0.215	0.0193	54162	0.9816	Alzheimer's disease || ||	8.82877e-42	0.0044	186925	Total cholesterol || id:ieu-a-301
rs581080	C	G	C	G	0.0377	0.0163	0.8206	0.0208	54162	0.4346	Alzheimer's disease || ||	1.02212e-13	0.0047	187121	Total cholesterol || id:ieu-a-301
rs6016373	G	A	G	A	-0.0319	-0.0201	0.3734	0.0159	54162	0.2062	Alzheimer's disease || ||	1.00207e-17	0.0036	185730	Total cholesterol || id:ieu-a-301
rs633695	G	A	G	A	0.0433	0.0094	0.285	0.0169	54162	0.5764	Alzheimer's disease || ||	1.0539e-14	0.0058	93067	Total cholesterol || id:ieu-a-301
rs646776	T	C	T	C	0.1272	0.007	0.7876	0.0192	54162	0.717599	Alzheimer's disease || ||	4.77529e-187	0.0042	187288	Total cholesterol || id:ieu-a-301
rs6504872	T	C	T	C	0.025	-0.0515	0.4723	0.0162	54162	0.00144301	Alzheimer's disease || ||	6.98715e-12	0.0035	185712	Total cholesterol || id:ieu-a-301
rs6511720	T	G	T	G	-0.1851	-0.0095	0.09763	0.026	54162	0.714301	Alzheimer's disease || ||	1e-200	0.0059	184764	Total cholesterol || id:ieu-a-301
rs6544713	C	T	C	T	-0.0773	0.0183	0.7058	0.0173	54162	0.2891	Alzheimer's disease || ||	1.685e-81	0.004	187199	Total cholesterol || id:ieu-a-301
rs6573778	C	T	C	T	-0.0263	0.0263	0.529	0.0173	54162	0.1288	Alzheimer's disease || ||	2.95801e-11	0.0039	187079	Total cholesterol || id:ieu-a-301
rs6603981	T	C	T	C	0.0351	-0.0314	0.8061	0.0198	54162	0.1127	Alzheimer's disease || ||	7.84513e-15	0.0043	187329	Total cholesterol || id:ieu-a-301
rs6709904	G	A	G	A	-0.0545	-0.0371	0.1135	0.0242	54162	0.1258	Alzheimer's disease || ||	8.39499e-10	0.0083	94558	Total cholesterol || id:ieu-a-301
rs6818397	G	T	G	T	-0.0254	0.0066	0.5871	0.0169	54162	0.693999	Alzheimer's disease || ||	9.51043e-11	0.0039	186903	Total cholesterol || id:ieu-a-301
rs6882076	C	T	C	T	0.0508	0.0084	0.6662	0.0169	54162	0.619001	Alzheimer's disease || ||	5.35427e-41	0.0037	187270	Total cholesterol || id:ieu-a-301
rs7412	T	C	T	C	-0.3736	-0.3871	0.06596	0.0395	54162	1.23396e-22	Alzheimer's disease || ||	1e-200	0.0096	92046	Total cholesterol || id:ieu-a-301
rs7534572	G	C	G	C	0.0629	-0.0332	0.69	0.0164	54162	0.0433002	Alzheimer's disease || ||	3.59667e-28	0.0055	83151	Total cholesterol || id:ieu-a-301
rs7551981	T	G	T	G	0.0358	-0.0221	0.595	0.0166	54162	0.1847	Alzheimer's disease || ||	7.49722e-22	0.0037	187282	Total cholesterol || id:ieu-a-301
rs75687619	T	G	T	G	0.1592	1.0714	0.02375	0.0609	54162	3.03389e-69	Alzheimer's disease || ||	3.60911e-22	0.0153	91543	Total cholesterol || id:ieu-a-301
rs7616006	G	A	G	A	-0.0315	0.0039	0.4446	0.0155	54162	0.8014	Alzheimer's disease || ||	8.40621e-17	0.0036	187246	Total cholesterol || id:ieu-a-301
rs7640978	T	C	T	C	-0.0376	-0.0136	0.1055	0.0282	54162	0.6293	Alzheimer's disease || ||	1.65798e-08	0.0066	186485	Total cholesterol || id:ieu-a-301
rs780093	C	T	C	T	-0.0515	0.0044	0.5871	0.0161	54162	0.783201	Alzheimer's disease || ||	2.59119e-42	0.0036	186446	Total cholesterol || id:ieu-a-301
rs7832643	T	G	T	G	0.0289	0.019	0.405	0.0177	54162	0.2836	Alzheimer's disease || ||	3.12104e-13	0.0037	178980	Total cholesterol || id:ieu-a-301
rs8103315	A	C	A	C	0.0422	0.2823	0.1359	0.0227	54162	1.52405e-35	Alzheimer's disease || ||	5.94155e-15	0.0055	156370	Total cholesterol || id:ieu-a-301
rs9272775	C	T	C	T	0.0317	-0.0495	0.2823	0.0226	54162	0.0286003	Alzheimer's disease || ||	2.12501e-08	0.0055	89534	Total cholesterol || id:ieu-a-301
rs9306897	C	T	C	T	-0.0488	0.0043	0.6966	0.0167	54162	0.7951	Alzheimer's disease || ||	7.5145e-37	0.0037	185808	Total cholesterol || id:ieu-a-301
rs9376090	C	T	C	T	-0.0254	0.0006	0.2718	0.018	54162	0.9717	Alzheimer's disease || ||	2.59502e-09	0.004	187263	Total cholesterol || id:ieu-a-301
rs964184	C	G	C	G	-0.1214	-0.0207	NA	0.0226	54162	0.3617	Alzheimer's disease || ||	2.83792e-55	0.0076	94573	Total cholesterol || id:ieu-a-301
rs10134246	A	G	A	G	0.0115497	0.0403	0.909375	0.0256	54162	0.1161	Alzheimer's disease || ||	7.29995e-09	0.00199674	462434	Current tobacco smoking || id:ukb-b-223
rs11096777	C	T	C	T	0.00945455	0.0511	0.18038	0.0209	54162	0.01431	Alzheimer's disease || ||	1.7e-10	0.00148135	462434	Current tobacco smoking || id:ukb-b-223
rs11596214	A	G	A	G	-0.00641136	-0.0065	0.406984	0.0158	54162	0.679499	Alzheimer's disease || ||	4.09996e-08	0.00116851	462434	Current tobacco smoking || id:ukb-b-223
rs12469094	C	A	C	A	-0.00685575	0.0126	0.68186	0.0167	54162	0.452	Alzheimer's disease || ||	2.19999e-08	0.00122457	462434	Current tobacco smoking || id:ukb-b-223
rs12666306	G	A	G	A	-0.00920045	0.0368	0.498932	0.0154	54162	0.0170899	Alzheimer's disease || ||	8.80035e-16	0.00114399	462434	Current tobacco smoking || id:ukb-b-223
rs1452787	G	A	G	A	0.00705403	0.0206	0.276265	0.0173	54162	0.2325	Alzheimer's disease || ||	2.80001e-08	0.00127089	462434	Current tobacco smoking || id:ukb-b-223
rs1549212	T	C	T	C	-0.00751493	0.0129	0.626264	0.0176	54162	0.464	Alzheimer's disease || ||	1.7e-10	0.00117745	462434	Current tobacco smoking || id:ukb-b-223
rs2047502	A	C	A	C	0.00713317	0.0071	0.411335	0.0158	54162	0.6532	Alzheimer's disease || ||	7.79992e-10	0.00116004	462434	Current tobacco smoking || id:ukb-b-223
rs214904	T	C	T	C	-0.00657698	0.0341	0.398277	0.0157	54162	0.0298099	Alzheimer's disease || ||	1.6e-08	0.0011636	462434	Current tobacco smoking || id:ukb-b-223
rs2588978	C	T	C	T	-0.00651265	0.0003	0.519271	0.0161	54162	0.9866	Alzheimer's disease || ||	1e-08	0.00113776	462434	Current tobacco smoking || id:ukb-b-223
rs2740776	T	C	T	C	-0.00720834	0.0459	0.727232	0.0174	54162	0.00835795	Alzheimer's disease || ||	1.89998e-08	0.0012828	462434	Current tobacco smoking || id:ukb-b-223
rs28545614	T	C	T	C	0.00893084	0.0273	0.156729	0.0229	54162	0.2331	Alzheimer's disease || ||	1.29999e-08	0.00157156	462434	Current tobacco smoking || id:ukb-b-223
rs3001723	A	G	A	G	0.00721497	-0.009	0.301175	0.0173	54162	0.6031	Alzheimer's disease || ||	5.69994e-09	0.00123869	462434	Current tobacco smoking || id:ukb-b-223
rs3025316	C	T	C	T	0.0196756	-0.0257	0.11429	0.0268	54162	0.3364	Alzheimer's disease || ||	5.00035e-28	0.00179265	462434	Current tobacco smoking || id:ukb-b-223
rs3087898	A	G	A	G	-0.00641507	-0.0071	0.424573	0.0158	54162	0.6531	Alzheimer's disease || ||	2.59998e-08	0.00115214	462434	Current tobacco smoking || id:ukb-b-223
rs329120	T	C	T	C	-0.00666687	-0.0352	0.419332	0.016	54162	0.0276898	Alzheimer's disease || ||	7.69999e-09	0.00115429	462434	Current tobacco smoking || id:ukb-b-223
rs34488670	C	T	C	T	0.00979043	-0.0036	0.21112	0.0189	54162	0.8487	Alzheimer's disease || ||	2.70023e-12	0.00139999	462434	Current tobacco smoking || id:ukb-b-223
rs3742365	C	T	C	T	0.00667236	-0.0041	0.404833	0.0164	54162	0.801	Alzheimer's disease || ||	9.49992e-09	0.0011627	462434	Current tobacco smoking || id:ukb-b-223
rs4543592	C	T	C	T	0.00629793	-0.02	0.480069	0.016	54162	0.2099	Alzheimer's disease || ||	3.40001e-08	0.00114096	462434	Current tobacco smoking || id:ukb-b-223
rs4955411	G	A	G	A	-0.00751747	-0.014	0.778828	0.0185	54162	0.4507	Alzheimer's disease || ||	4.09996e-08	0.00137006	462434	Current tobacco smoking || id:ukb-b-223
rs56113850	C	T	C	T	-0.0126594	0.027	0.577585	0.0228	54162	0.235	Alzheimer's disease || ||	4.19952e-28	0.0011517	462434	Current tobacco smoking || id:ukb-b-223
rs58040999	C	G	C	G	0.00676278	0.0018	0.463299	0.0156	54162	0.9079	Alzheimer's disease || ||	3.50002e-09	0.00114524	462434	Current tobacco smoking || id:ukb-b-223
rs6727997	G	A	G	A	0.00737776	0.031	0.654335	0.0182	54162	0.0883609	Alzheimer's disease || ||	8.99995e-10	0.00120444	462434	Current tobacco smoking || id:ukb-b-223
rs7155595	C	A	C	A	0.00695048	-0.0164	0.325737	0.0168	54162	0.3282	Alzheimer's disease || ||	1.2e-08	0.00121953	462434	Current tobacco smoking || id:ukb-b-223
rs72804566	T	A	T	A	0.0172183	-0.0231	0.03574	0.0443	54162	0.6029	Alzheimer's disease || ||	2e-08	0.00307032	462434	Current tobacco smoking || id:ukb-b-223
rs7569203	C	A	C	A	0.00691663	0.0021	0.311269	0.0178	54162	0.9054	Alzheimer's disease || ||	2e-08	0.00123291	462434	Current tobacco smoking || id:ukb-b-223
rs7807019	G	A	G	A	0.00745097	0.0228	0.459691	0.0157	54162	0.1467	Alzheimer's disease || ||	6.89922e-11	0.00114226	462434	Current tobacco smoking || id:ukb-b-223
rs8031550	A	G	A	G	-0.00797846	-0.0078	0.240382	0.0178	54162	0.6635	Alzheimer's disease || ||	2.1e-09	0.00133233	462434	Current tobacco smoking || id:ukb-b-223
rs9607805	T	C	T	C	0.00825078	-0.0423	0.726456	0.0176	54162	0.0165299	Alzheimer's disease || ||	1.2e-10	0.00128174	462434	Current tobacco smoking || id:ukb-b-223
rs10195252	C	T	C	T	-0.016	-0.0265	0.442	0.0162	54162	0.102	Alzheimer's disease || ||	4.87001e-10	0.0026	108557	Fasting insulin || id:ieu-a-779
rs1121980	A	G	A	G	0.02	0.0005	0.518	0.0157	54162	0.9724	Alzheimer's disease || ||	8.35988e-16	0.0025	108557	Fasting insulin || id:ieu-a-779
rs1167800	A	G	A	G	0.016	-0.009	0.451	0.0163	54162	0.5802	Alzheimer's disease || ||	2.61e-09	0.0026	108557	Fasting insulin || id:ieu-a-779
rs1260326	C	T	C	T	0.019	0.0008	0.42	0.0161	54162	0.9608	Alzheimer's disease || ||	3.83972e-14	0.0026	108557	Fasting insulin || id:ieu-a-779
rs1530559	G	A	G	A	-0.014	0.0357	0.597	0.0191	54162	0.0617504	Alzheimer's disease || ||	3.37e-08	0.0026	108557	Fasting insulin || id:ieu-a-779
rs2745353	T	C	T	C	0.014	0.0089	0.45	0.0156	54162	0.5681	Alzheimer's disease || ||	5.47999e-09	0.0025	108557	Fasting insulin || id:ieu-a-779
rs2972143	G	A	G	A	0.014	0.0143	0.371	0.0159	54162	0.37	Alzheimer's disease || ||	3.15e-08	0.0026	108557	Fasting insulin || id:ieu-a-779
rs4865796	A	G	A	G	0.015	0.0123	0.292	0.0167	54162	0.4635	Alzheimer's disease || ||	2.09002e-08	0.0026	108557	Fasting insulin || id:ieu-a-779
rs731839	A	G	A	G	-0.014	-0.0102	0.341	0.0168	54162	0.5428	Alzheimer's disease || ||	1.72001e-08	0.0026	108557	Fasting insulin || id:ieu-a-779
rs7903146	T	C	T	C	-0.018	-0.0054	0.721	0.0173	54162	0.753199	Alzheimer's disease || ||	6.13056e-11	0.0028	108557	Fasting insulin || id:ieu-a-779
rs860598	A	G	A	G	0.018	0.0111	0.136	0.0207	54162	0.594101	Alzheimer's disease || ||	1.63999e-08	0.0032	108557	Fasting insulin || id:ieu-a-779
rs983309	G	T	G	T	-0.029	-0.0237	0.097	0.0255	54162	0.3539	Alzheimer's disease || ||	3.80978e-14	0.0038	108557	Fasting insulin || id:ieu-a-779
rs9884482	C	T	C	T	0.016	0.0162	0.65	0.016	54162	0.3104	Alzheimer's disease || ||	1.39991e-11	0.0024	108557	Fasting insulin || id:ieu-a-779
rs10195252	C	T	C	T	-0.0238	-0.0265	0.4182	0.0162	54162	0.102	Alzheimer's disease || ||	3.81197e-08	0.0039	157208	LDL cholesterol || id:ieu-a-300
rs10490626	A	G	A	G	-0.0508	-0.0451	0.07916	0.0286	54162	0.1152	Alzheimer's disease || ||	1.69707e-12	0.0069	173044	LDL cholesterol || id:ieu-a-300
rs10832962	T	C	T	C	0.032	-0.0006	0.719	0.0183	54162	0.9758	Alzheimer's disease || ||	6.61912e-14	0.004	172920	LDL cholesterol || id:ieu-a-300
rs10893499	A	G	A	G	0.0521	0.0179	0.1438	0.0227	54162	0.4305	Alzheimer's disease || ||	3.861e-21	0.0053	172980	LDL cholesterol || id:ieu-a-300
rs10903129	G	A	G	A	0.0328	0.0111	0.5369	0.0155	54162	0.4723	Alzheimer's disease || ||	3.0297e-17	0.0037	169920	LDL cholesterol || id:ieu-a-300
rs112201728	T	C	T	C	0.0675	-0.0681	0.05805	0.03	54162	0.0233002	Alzheimer's disease || ||	8.51393e-10	0.0104	83123	LDL cholesterol || id:ieu-a-300
rs11563251	T	C	T	C	0.0345	0.0315	0.1253	0.0265	54162	0.2342	Alzheimer's disease || ||	4.49904e-08	0.0062	172855	LDL cholesterol || id:ieu-a-300
rs1169288	C	A	C	A	0.0375	-0.0167	0.3338	0.0169	54162	0.3213	Alzheimer's disease || ||	6.44763e-21	0.004	163086	LDL cholesterol || id:ieu-a-300
rs12066643	T	C	T	C	-0.0389	-0.0118	0.1187	0.0252	54162	0.6382	Alzheimer's disease || ||	1.06299e-08	0.0064	171295	LDL cholesterol || id:ieu-a-300
rs1250229	C	T	C	T	0.0243	0.0183	0.7889	0.0188	54162	0.3303	Alzheimer's disease || ||	3.12997e-08	0.0042	173032	LDL cholesterol || id:ieu-a-300
rs12748152	T	C	T	C	0.0499	0.0344	0.07124	0.0295	54162	0.2429	Alzheimer's disease || ||	3.20922e-12	0.0066	172988	LDL cholesterol || id:ieu-a-300
rs12916	C	T	C	T	0.0733	0.0047	0.4314	0.0164	54162	0.7734	Alzheimer's disease || ||	7.79112e-78	0.0038	168357	LDL cholesterol || id:ieu-a-300
rs13277801	T	C	T	C	-0.0338	-0.0033	0.653	0.0162	54162	0.8409	Alzheimer's disease || ||	3.99393e-17	0.0038	173010	LDL cholesterol || id:ieu-a-300
rs1367117	A	G	A	G	0.1186	0.0057	0.2876	0.0172	54162	0.74	Alzheimer's disease || ||	9.48418e-183	0.004	173007	LDL cholesterol || id:ieu-a-300
rs1408272	G	T	G	T	-0.052	0.0015	0.05277	0.0385	54162	0.9689	Alzheimer's disease || ||	3.67502e-09	0.0083	167888	LDL cholesterol || id:ieu-a-300
rs1564348	C	T	C	T	0.0481	0.0074	0.1451	0.0219	54162	0.7366	Alzheimer's disease || ||	2.76185e-21	0.005	172989	LDL cholesterol || id:ieu-a-300
rs16831243	T	C	T	C	0.0378	0.0004	0.1807	0.0218	54162	0.9844	Alzheimer's disease || ||	9.06358e-12	0.0055	162945	LDL cholesterol || id:ieu-a-300
rs16891156	C	A	C	A	0.0965	-0.0755	0.01847	0.0692	54162	0.2752	Alzheimer's disease || ||	8.23304e-09	0.0171	90465	LDL cholesterol || id:ieu-a-300
rs17404153	T	G	T	G	-0.0336	-0.014	0.1438	0.0245	54162	0.5682	Alzheimer's disease || ||	1.83202e-09	0.0054	172898	LDL cholesterol || id:ieu-a-300
rs174583	T	C	T	C	-0.0522	-0.0076	0.3747	0.017	54162	0.656299	Alzheimer's disease || ||	7.00326e-41	0.0038	172982	LDL cholesterol || id:ieu-a-300
rs1800961	T	C	T	C	-0.0685	0.0596	0.0343	0.0467	54162	0.2016	Alzheimer's disease || ||	6.03407e-10	0.0106	142698	LDL cholesterol || id:ieu-a-300
rs1801689	C	A	C	A	0.1028	-0.1437	0.03694	0.0759	54162	0.0583203	Alzheimer's disease || ||	9.80844e-12	0.0139	111143	LDL cholesterol || id:ieu-a-300
rs1883025	T	C	T	C	-0.0296	0.0705	0.2427	0.0182	54162	0.0001037	Alzheimer's disease || ||	6.14045e-11	0.0044	172330	LDL cholesterol || id:ieu-a-300
rs2000999	A	G	A	G	0.065	-0.0082	0.1847	0.0195	54162	0.676401	Alzheimer's disease || ||	4.21891e-41	0.0046	171510	LDL cholesterol || id:ieu-a-300
rs2030746	T	C	T	C	0.0214	-0.0047	0.3984	0.0165	54162	0.7756	Alzheimer's disease || ||	8.60498e-09	0.0038	173024	LDL cholesterol || id:ieu-a-300
rs2073547	G	A	G	A	0.0485	-0.0247	0.1939	0.0211	54162	0.2428	Alzheimer's disease || ||	1.92309e-21	0.0049	169889	LDL cholesterol || id:ieu-a-300
rs2228603	T	C	T	C	-0.104	0.0144	0.07124	0.0321	54162	0.653	Alzheimer's disease || ||	4.43302e-44	0.0072	158643	LDL cholesterol || id:ieu-a-300
rs2315065	A	C	A	C	0.1102	-0.1055	0.08707	0.0508	54162	0.0378303	Alzheimer's disease || ||	5.22998e-12	0.0158	67446	LDL cholesterol || id:ieu-a-300
rs2328223	C	A	C	A	0.0299	0.0428	0.2493	0.0198	54162	0.0310099	Alzheimer's disease || ||	5.63197e-09	0.005	170762	LDL cholesterol || id:ieu-a-300
rs2390536	A	G	A	G	0.0223	0.0017	0.3681	0.0162	54162	0.918	Alzheimer's disease || ||	2.037e-08	0.0038	172981	LDL cholesterol || id:ieu-a-300
rs2419604	G	A	G	A	-0.0302	-0.0132	0.6821	0.0168	54162	0.4334	Alzheimer's disease || ||	7.49031e-14	0.004	172807	LDL cholesterol || id:ieu-a-300
rs247616	T	C	T	C	-0.0547	0.0015	0.2929	0.017	54162	0.9274	Alzheimer's disease || ||	2.56626e-37	0.0041	171458	LDL cholesterol || id:ieu-a-300
rs2495495	C	T	C	T	-0.0342	-0.0335	0.8654	0.0242	54162	0.1665	Alzheimer's disease || ||	3.51998e-08	0.0059	162403	LDL cholesterol || id:ieu-a-300
rs2587534	A	G	A	G	0.0391	0.0174	0.5277	0.0157	54162	0.2673	Alzheimer's disease || ||	8.05564e-25	0.0037	172966	LDL cholesterol || id:ieu-a-300
rs2642438	G	A	G	A	0.0352	0.0055	0.7454	0.0186	54162	0.7673	Alzheimer's disease || ||	7.31813e-16	0.0042	165470	LDL cholesterol || id:ieu-a-300
rs267733	G	A	G	A	-0.0331	-0.0409	0.1372	0.0217	54162	0.0592598	Alzheimer's disease || ||	5.28506e-09	0.0053	164562	LDL cholesterol || id:ieu-a-300
rs2710642	A	G	A	G	0.0239	0.0046	0.6187	0.0162	54162	0.7752	Alzheimer's disease || ||	6.08906e-09	0.0038	172994	LDL cholesterol || id:ieu-a-300
rs2737252	A	G	A	G	-0.0314	0.0331	0.2559	0.0174	54162	0.0566005	Alzheimer's disease || ||	7.03882e-14	0.0041	172950	LDL cholesterol || id:ieu-a-300
rs2886232	C	T	C	T	-0.0451	0.0063	0.8799	0.0295	54162	0.8319	Alzheimer's disease || ||	3.87614e-11	0.0064	162498	LDL cholesterol || id:ieu-a-300
rs2954029	T	A	T	A	-0.0564	-0.0137	0.4683	0.016	54162	0.3908	Alzheimer's disease || ||	2.09508e-50	0.0036	172963	LDL cholesterol || id:ieu-a-300
rs2965157	C	T	C	T	-0.1886	-0.1309	0.02111	0.0591	54162	0.0265901	Alzheimer's disease || ||	7.29122e-62	0.0112	170260	LDL cholesterol || id:ieu-a-300
rs314253	C	T	C	T	-0.0242	0.0244	0.3351	0.0166	54162	0.1417	Alzheimer's disease || ||	3.43598e-10	0.0038	169706	LDL cholesterol || id:ieu-a-300
rs3184504	C	T	C	T	0.0268	0.0252	0.5343	0.0159	54162	0.1134	Alzheimer's disease || ||	4.20339e-12	0.0038	164996	LDL cholesterol || id:ieu-a-300
rs364585	G	A	G	A	0.0249	-0.0137	0.6332	0.0158	54162	0.385	Alzheimer's disease || ||	4.27799e-10	0.0038	171526	LDL cholesterol || id:ieu-a-300
rs3757354	T	C	T	C	-0.0382	0.0127	0.2098	0.0197	54162	0.5209	Alzheimer's disease || ||	2.08689e-17	0.0044	172987	LDL cholesterol || id:ieu-a-300
rs3780181	G	A	G	A	-0.0445	-0.0707	0.05277	0.0306	54162	0.02088	Alzheimer's disease || ||	1.76401e-09	0.0074	171976	LDL cholesterol || id:ieu-a-300
rs4253776	G	A	G	A	0.0311	0.0178	0.124	0.0255	54162	0.4862	Alzheimer's disease || ||	3.35297e-08	0.0059	171071	LDL cholesterol || id:ieu-a-300
rs4530754	A	G	A	G	0.0275	0.0216	0.5818	0.0155	54162	0.1621	Alzheimer's disease || ||	3.57602e-12	0.0036	173003	LDL cholesterol || id:ieu-a-300
rs4722551	C	T	C	T	0.0391	-0.0221	0.1702	0.0216	54162	0.3072	Alzheimer's disease || ||	3.94912e-14	0.0049	172946	LDL cholesterol || id:ieu-a-300
rs4942486	C	T	C	T	-0.0243	-0.0131	0.5383	0.0159	54162	0.408	Alzheimer's disease || ||	2.261e-11	0.0037	171930	LDL cholesterol || id:ieu-a-300
rs4970712	C	A	C	A	0.0339	-0.0309	0.8061	0.0198	54162	0.1186	Alzheimer's disease || ||	2.4581e-13	0.0044	173036	LDL cholesterol || id:ieu-a-300
rs4970834	T	C	T	C	-0.1503	-0.0056	0.1873	0.0206	54162	0.786901	Alzheimer's disease || ||	1e-200	0.0047	172825	LDL cholesterol || id:ieu-a-300
rs5763662	T	C	T	C	0.0767	0.0183	0.02507	0.0508	54162	0.719399	Alzheimer's disease || ||	1.191e-08	0.0121	162777	LDL cholesterol || id:ieu-a-300
rs579459	C	T	C	T	0.0665	-0.0004	0.215	0.0193	54162	0.9816	Alzheimer's disease || ||	2.4188e-44	0.0045	172706	LDL cholesterol || id:ieu-a-300
rs6016373	G	A	G	A	-0.0349	-0.0201	0.3734	0.0159	54162	0.2062	Alzheimer's disease || ||	7.94694e-19	0.0037	171559	LDL cholesterol || id:ieu-a-300
rs6065311	C	T	C	T	0.0417	0.0045	0.4604	0.0159	54162	0.774901	Alzheimer's disease || ||	1.65615e-30	0.0036	171333	LDL cholesterol || id:ieu-a-300
rs6504872	T	C	T	C	0.0274	-0.0515	0.4723	0.0162	54162	0.00144301	Alzheimer's disease || ||	3.47937e-13	0.0037	171519	LDL cholesterol || id:ieu-a-300
rs6511720	T	G	T	G	-0.2209	-0.0095	0.09763	0.026	54162	0.714301	Alzheimer's disease || ||	1e-200	0.0061	170608	LDL cholesterol || id:ieu-a-300
rs6544713	C	T	C	T	-0.0806	0.0183	0.7058	0.0173	54162	0.2891	Alzheimer's disease || ||	4.84284e-83	0.0041	172940	LDL cholesterol || id:ieu-a-300
rs6693893	C	T	C	T	-0.0767	0.0093	0.03562	0.0452	54162	0.8377	Alzheimer's disease || ||	2.87601e-08	0.0132	83065	LDL cholesterol || id:ieu-a-300
rs6709904	G	A	G	A	-0.055	-0.0371	0.1135	0.0242	54162	0.1258	Alzheimer's disease || ||	4.57699e-10	0.0085	89852	LDL cholesterol || id:ieu-a-300
rs676388	C	T	C	T	0.0265	0.0281	0.4631	0.0162	54162	0.0824708	Alzheimer's disease || ||	1.31009e-11	0.0039	166830	LDL cholesterol || id:ieu-a-300
rs6818397	G	T	G	T	-0.0224	0.0066	0.5871	0.0169	54162	0.693999	Alzheimer's disease || ||	1.67699e-08	0.004	172685	LDL cholesterol || id:ieu-a-300
rs6882076	C	T	C	T	0.0456	0.0084	0.6662	0.0169	54162	0.619001	Alzheimer's disease || ||	3.30979e-31	0.0038	173006	LDL cholesterol || id:ieu-a-300
rs6909746	T	C	T	C	-0.0263	0.0105	0.3918	0.0163	54162	0.5213	Alzheimer's disease || ||	7.85959e-11	0.0037	170097	LDL cholesterol || id:ieu-a-300
rs7254892	A	G	A	G	-0.4853	-0.25	0.03166	0.0569	54162	1.11699e-05	Alzheimer's disease || ||	1e-200	0.0119	139198	LDL cholesterol || id:ieu-a-300
rs72902576	G	T	G	T	-0.0933	-0.0035	0.03694	0.0475	54162	0.9409	Alzheimer's disease || ||	9.57635e-12	0.0133	82068	LDL cholesterol || id:ieu-a-300
rs7534572	G	C	G	C	0.0407	-0.0332	0.69	0.0164	54162	0.0433002	Alzheimer's disease || ||	1.28795e-11	0.0058	75145	LDL cholesterol || id:ieu-a-300
rs7551981	T	G	T	G	0.0472	-0.0221	0.595	0.0166	54162	0.1847	Alzheimer's disease || ||	1.36207e-33	0.0038	173021	LDL cholesterol || id:ieu-a-300
rs75687619	T	G	T	G	0.1735	1.0714	0.02375	0.0609	54162	3.03389e-69	Alzheimer's disease || ||	8.05193e-24	0.0161	82003	LDL cholesterol || id:ieu-a-300
rs7640978	T	C	T	C	-0.0392	-0.0136	0.1055	0.0282	54162	0.6293	Alzheimer's disease || ||	9.83694e-09	0.0069	172228	LDL cholesterol || id:ieu-a-300
rs7832643	T	G	T	G	0.0339	0.019	0.405	0.0177	54162	0.2836	Alzheimer's disease || ||	2.67116e-17	0.0038	164854	LDL cholesterol || id:ieu-a-300
rs8017377	A	G	A	G	0.0303	-0.0092	0.4591	0.016	54162	0.567799	Alzheimer's disease || ||	2.51594e-15	0.0038	172866	LDL cholesterol || id:ieu-a-300
rs964184	C	G	C	G	-0.0855	-0.0207	NA	0.0226	54162	0.3617	Alzheimer's disease || ||	2.00817e-26	0.0078	89866	LDL cholesterol || id:ieu-a-300
rs9875338	A	G	A	G	-0.027	0.0153	0.3879	0.0156	54162	0.328	Alzheimer's disease || ||	2.21004e-11	0.0037	172895	LDL cholesterol || id:ieu-a-300
rs10747083	A	G	A	G	0.013	0.0317	0.25	0.0207	54162	0.126	Alzheimer's disease || ||	7.57007e-09	0.0023	133010	Fasting glucose || id:ieu-a-777
rs10811661	C	T	C	T	-0.024	0.0059	0.801	0.0207	54162	0.7759	Alzheimer's disease || ||	5.64937e-18	0.0028	133010	Fasting glucose || id:ieu-a-777
rs10814916	C	A	C	A	0.016	0.0111	0.434	0.0155	54162	0.475501	Alzheimer's disease || ||	2.25996e-13	0.0022	133010	Fasting glucose || id:ieu-a-777
rs10830963	G	C	G	C	0.078	0.0146	0.7	0.0193	54162	0.4473	Alzheimer's disease || ||	1e-200	0.0025	133010	Fasting glucose || id:ieu-a-777
rs11195502	T	C	T	C	-0.032	0.0173	0.925	0.0269	54162	0.5205	Alzheimer's disease || ||	1.97015e-18	0.0037	133010	Fasting glucose || id:ieu-a-777
rs11558471	G	A	G	A	-0.029	-0.0323	0.748	0.0171	54162	0.0594593	Alzheimer's disease || ||	7.8001e-37	0.0023	133010	Fasting glucose || id:ieu-a-777
rs11603334	A	G	A	G	-0.019	0.0008	0.871	0.0221	54162	0.9725	Alzheimer's disease || ||	1.11995e-11	0.0028	133010	Fasting glucose || id:ieu-a-777
rs11607883	A	G	A	G	-0.021	-0.0476	0.531	0.0155	54162	0.00208401	Alzheimer's disease || ||	6.31975e-24	0.0021	133010	Fasting glucose || id:ieu-a-777
rs11619319	G	A	G	A	0.02	-0.0149	0.788	0.0191	54162	0.4356	Alzheimer's disease || ||	1.33015e-15	0.0024	133010	Fasting glucose || id:ieu-a-777
rs11708067	G	A	G	A	-0.023	-0.0354	0.774	0.0189	54162	0.0612604	Alzheimer's disease || ||	1.29987e-18	0.0026	133010	Fasting glucose || id:ieu-a-777
rs11715915	T	C	T	C	-0.012	-0.0102	0.726	0.0175	54162	0.5586	Alzheimer's disease || ||	4.90004e-08	0.0022	133010	Fasting glucose || id:ieu-a-777
rs1260326	C	T	C	T	0.029	0.0008	0.42	0.0161	54162	0.9608	Alzheimer's disease || ||	2.1702e-41	0.0021	133010	Fasting glucose || id:ieu-a-777
rs1280	C	T	C	T	-0.026	0.0382	0.863	0.023	54162	0.097389	Alzheimer's disease || ||	8.56052e-18	0.0031	133010	Fasting glucose || id:ieu-a-777
rs16913693	G	T	G	T	-0.043	0.0487	0.983	0.0615	54162	0.428	Alzheimer's disease || ||	3.50994e-11	0.0066	133010	Fasting glucose || id:ieu-a-777
rs17168486	T	C	T	C	0.031	-0.0254	0.827	0.0215	54162	0.2364	Alzheimer's disease || ||	3.1703e-28	0.0028	133010	Fasting glucose || id:ieu-a-777
rs174576	A	C	A	C	-0.02	-0.0077	0.655	0.0163	54162	0.6344	Alzheimer's disease || ||	1.18005e-18	0.0022	133010	Fasting glucose || id:ieu-a-777
rs2191349	T	G	T	G	0.029	0.0186	0.533	0.0156	54162	0.2339	Alzheimer's disease || ||	1.27997e-42	0.0021	133010	Fasting glucose || id:ieu-a-777
rs2302593	G	C	G	C	-0.014	0.0582	0.525	0.0164	54162	0.000392302	Alzheimer's disease || ||	9.25998e-10	0.0023	133010	Fasting glucose || id:ieu-a-777
rs3783347	T	G	T	G	-0.017	0.0125	0.781	0.0188	54162	0.5057	Alzheimer's disease || ||	1.31999e-10	0.0026	133010	Fasting glucose || id:ieu-a-777
rs3829109	A	G	A	G	-0.017	-0.0439	0.655	0.0199	54162	0.02733	Alzheimer's disease || ||	1.13e-10	0.0027	133010	Fasting glucose || id:ieu-a-777
rs4502156	C	T	C	T	-0.022	0.0062	0.58	0.0166	54162	0.710901	Alzheimer's disease || ||	1.38007e-25	0.0021	133010	Fasting glucose || id:ieu-a-777
rs4869272	T	C	T	C	0.018	0.0072	0.677	0.0171	54162	0.672901	Alzheimer's disease || ||	1.02e-15	0.0022	133010	Fasting glucose || id:ieu-a-777
rs560887	C	T	C	T	0.071	0.0232	0.326	0.0174	54162	0.1822	Alzheimer's disease || ||	1.39959e-178	0.0025	133010	Fasting glucose || id:ieu-a-777
rs6072275	A	G	A	G	0.016	0.0184	0.858	0.0216	54162	0.3931	Alzheimer's disease || ||	1.66001e-08	0.0028	133010	Fasting glucose || id:ieu-a-777
rs6113722	A	G	A	G	-0.035	-0.0189	0.96	0.0387	54162	0.6256	Alzheimer's disease || ||	2.49e-11	0.0053	133010	Fasting glucose || id:ieu-a-777
rs6943153	C	T	C	T	-0.015	-0.0032	0.279	0.0173	54162	0.8554	Alzheimer's disease || ||	1.63005e-12	0.0022	133010	Fasting glucose || id:ieu-a-777
rs6975024	C	T	C	T	0.061	0.0153	0.8	0.0203	54162	0.452	Alzheimer's disease || ||	2.88005e-99	0.0029	133010	Fasting glucose || id:ieu-a-777
rs749067	C	T	C	T	-0.017	0.0621	0.376	0.0164	54162	0.0001487	Alzheimer's disease || ||	6.12068e-15	0.0022	133010	Fasting glucose || id:ieu-a-777
rs7651090	G	A	G	A	0.013	0.015	0.704	0.0166	54162	0.3653	Alzheimer's disease || ||	1.75001e-08	0.0023	133010	Fasting glucose || id:ieu-a-777
rs7903146	T	C	T	C	0.022	-0.0054	0.721	0.0173	54162	0.753199	Alzheimer's disease || ||	2.71019e-20	0.0024	133010	Fasting glucose || id:ieu-a-777
rs882020	T	C	T	C	0.021	0.0237	0.879	0.0225	54162	0.2922	Alzheimer's disease || ||	3.04018e-12	0.003	133010	Fasting glucose || id:ieu-a-777
rs9368222	A	C	A	C	0.014	-0.0155	0.719	0.0178	54162	0.3857	Alzheimer's disease || ||	1e-09	0.0023	133010	Fasting glucose || id:ieu-a-777
rs983309	G	T	G	T	-0.026	-0.0237	0.097	0.0255	54162	0.3539	Alzheimer's disease || ||	6.29071e-15	0.0033	133010	Fasting glucose || id:ieu-a-777
